# Supplementary material for: OpenNahele: the open Hawaiian forest plot database
Source: Biodivers Data J. 2018 Sep 27;(6):e28406. doi: 10.3897/BDJ.6.e28406 (PMC6172291; doi:10.3897/BDJ.6.e28406)
Supplement: Supplementary material 1 — OpenNahele forest plot data [file bdj-06-e28406-s001.csv]

Island	PlotID	Study	Plot_Area	Longitude	Latitude	Year	Census	Tree_ID	Scientific_name	Family	Angiosperm	Monocot	Native_Status	Cultivated_Status	Abundance	Abundance_ha	DBH_cm
Hawai'i Island	2	Zimmerman	1017.88	-154.91	19.444	2003	1	6219	Cibotium glaucum	14	0	0	native	NA	1	39.3	14.3
Hawai'i Island	2	Zimmerman	1017.88	-154.91	19.444	2003	1	6202	Cibotium glaucum	14	0	0	native	NA	1	39.3	13.5
Hawai'i Island	2	Zimmerman	1017.88	-154.91	19.444	2003	1	6193	Cibotium glaucum	14	0	0	native	NA	1	39.3	17.8
Hawai'i Island	2	Zimmerman	1017.88	-154.91	19.444	2003	1	6248	Cibotium glaucum	14	0	0	native	NA	1	39.3	7.2
Hawai'i Island	2	Zimmerman	1017.88	-154.91	19.444	2003	1	6239	Cibotium glaucum	14	0	0	native	NA	1	9.82	30.9
Hawai'i Island	2	Zimmerman	1017.88	-154.91	19.444	2003	1	6241	Cibotium glaucum	14	0	0	native	NA	1	39.3	14.2
Hawai'i Island	2	Zimmerman	1017.88	-154.91	19.444	2003	1	6266	Cibotium glaucum	14	0	0	native	NA	1	39.3	24.8
Hawai'i Island	2	Zimmerman	1017.88	-154.91	19.444	2003	1	6274	Cibotium glaucum	14	0	0	native	NA	1	39.3	20
Hawai'i Island	2	Zimmerman	1017.88	-154.91	19.444	2003	1	6264	Cibotium glaucum	14	0	0	native	NA	1	39.3	20
Hawai'i Island	2	Zimmerman	1017.88	-154.91	19.444	2003	1	6289	Cibotium glaucum	14	0	0	native	NA	1	39.3	14.5
Hawai'i Island	2	Zimmerman	1017.88	-154.91	19.444	2003	1	6263	Cibotium glaucum	14	0	0	native	NA	1	39.3	8.9
Hawai'i Island	2	Zimmerman	1017.88	-154.91	19.444	2003	1	6273	Cibotium glaucum	14	0	0	native	NA	1	39.3	21.4
Hawai'i Island	2	Zimmerman	1017.88	-154.91	19.444	2003	1	6278	Cibotium glaucum	14	0	0	native	NA	1	39.3	10.6
Hawai'i Island	2	Zimmerman	1017.88	-154.91	19.444	2003	1	6216	Cibotium menziesii	14	0	0	native	NA	1	39.3	17.6
Hawai'i Island	2	Zimmerman	1017.88	-154.91	19.444	2003	1	6206	Cibotium menziesii	14	0	0	native	NA	1	39.3	23.1
Hawai'i Island	2	Zimmerman	1017.88	-154.91	19.444	2003	1	6233	Cibotium menziesii	14	0	0	native	NA	1	39.3	17
Hawai'i Island	2	Zimmerman	1017.88	-154.91	19.444	2003	1	6230	Cibotium menziesii	14	0	0	native	NA	1	39.3	12.8
Hawai'i Island	2	Zimmerman	1017.88	-154.91	19.444	2003	1	6277	Cibotium menziesii	14	0	0	native	NA	1	39.3	13.5
Hawai'i Island	2	Zimmerman	1017.88	-154.91	19.444	2003	1	6276	Cibotium spp.	14	0	0	native	NA	1	39.3	15.1
Hawai'i Island	2	Zimmerman	1017.88	-154.91	19.444	2003	1	6222	Diospyros sandwicensis	21	1	0	native	NA	1	39.3	10.8
Hawai'i Island	2	Zimmerman	1017.88	-154.91	19.444	2003	1	6255	Diospyros sandwicensis	21	1	0	native	NA	1	39.3	10.8
Hawai'i Island	2	Zimmerman	1017.88	-154.91	19.444	2003	1	6254	Diospyros sandwicensis	21	1	0	native	NA	1	39.3	7.3
Hawai'i Island	2	Zimmerman	1017.88	-154.91	19.444	2003	1	6260	Diospyros sandwicensis	21	1	0	native	NA	1	39.3	25
Hawai'i Island	2	Zimmerman	1017.88	-154.91	19.444	2003	1	6190	Metrosideros polymorpha	34	1	0	native	NA	1	9.82	40.9
Hawai'i Island	2	Zimmerman	1017.88	-154.91	19.444	2003	1	6197	Metrosideros polymorpha	34	1	0	native	NA	1	9.82	54.1
Hawai'i Island	2	Zimmerman	1017.88	-154.91	19.444	2003	1	6205	Metrosideros polymorpha	34	1	0	native	NA	1	39.3	14.5
Hawai'i Island	2	Zimmerman	1017.88	-154.91	19.444	2003	1	6207	Metrosideros polymorpha	34	1	0	native	NA	1	9.82	54.2
Hawai'i Island	2	Zimmerman	1017.88	-154.91	19.444	2003	1	6208	Metrosideros polymorpha	34	1	0	native	NA	1	9.82	59.7
Hawai'i Island	2	Zimmerman	1017.88	-154.91	19.444	2003	1	6210	Metrosideros polymorpha	34	1	0	native	NA	1	39.3	5.2
Hawai'i Island	2	Zimmerman	1017.88	-154.91	19.444	2003	1	6211	Metrosideros polymorpha	34	1	0	native	NA	1	39.3	12.2
Hawai'i Island	2	Zimmerman	1017.88	-154.91	19.444	2003	1	6213	Metrosideros polymorpha	34	1	0	native	NA	1	39.3	15.8
Hawai'i Island	2	Zimmerman	1017.88	-154.91	19.444	2003	1	6215	Metrosideros polymorpha	34	1	0	native	NA	1	9.82	46.4
Hawai'i Island	2	Zimmerman	1017.88	-154.91	19.444	2003	1	6223	Metrosideros polymorpha	34	1	0	native	NA	1	9.82	31.2
Hawai'i Island	2	Zimmerman	1017.88	-154.91	19.444	2003	1	6224	Metrosideros polymorpha	34	1	0	native	NA	1	9.82	30.3
Hawai'i Island	2	Zimmerman	1017.88	-154.91	19.444	2003	1	6225	Metrosideros polymorpha	34	1	0	native	NA	1	9.82	39.8
Hawai'i Island	2	Zimmerman	1017.88	-154.91	19.444	2003	1	6227	Metrosideros polymorpha	34	1	0	native	NA	1	39.3	15.6
Hawai'i Island	2	Zimmerman	1017.88	-154.91	19.444	2003	1	6231	Metrosideros polymorpha	34	1	0	native	NA	1	39.3	5
Hawai'i Island	2	Zimmerman	1017.88	-154.91	19.444	2003	1	6232	Metrosideros polymorpha	34	1	0	native	NA	1	9.82	30.9
Hawai'i Island	2	Zimmerman	1017.88	-154.91	19.444	2003	1	6234	Metrosideros polymorpha	34	1	0	native	NA	1	9.82	65
Hawai'i Island	2	Zimmerman	1017.88	-154.91	19.444	2003	1	6235	Metrosideros polymorpha	34	1	0	native	NA	1	9.82	36.2
Hawai'i Island	2	Zimmerman	1017.88	-154.91	19.444	2003	1	6236	Metrosideros polymorpha	34	1	0	native	NA	1	9.82	33.4
Hawai'i Island	2	Zimmerman	1017.88	-154.91	19.444	2003	1	6237	Metrosideros polymorpha	34	1	0	native	NA	1	39.3	24.8
Hawai'i Island	2	Zimmerman	1017.88	-154.91	19.444	2003	1	6238	Metrosideros polymorpha	34	1	0	native	NA	1	9.82	31.9
Hawai'i Island	2	Zimmerman	1017.88	-154.91	19.444	2003	1	6243	Metrosideros polymorpha	34	1	0	native	NA	1	39.3	17.6
Hawai'i Island	2	Zimmerman	1017.88	-154.91	19.444	2003	1	6247	Metrosideros polymorpha	34	1	0	native	NA	1	9.82	52.7
Hawai'i Island	2	Zimmerman	1017.88	-154.91	19.444	2003	1	6249	Metrosideros polymorpha	34	1	0	native	NA	1	9.82	52.9
Hawai'i Island	2	Zimmerman	1017.88	-154.91	19.444	2003	1	6250	Metrosideros polymorpha	34	1	0	native	NA	1	9.82	32
Hawai'i Island	2	Zimmerman	1017.88	-154.91	19.444	2003	1	6251	Metrosideros polymorpha	34	1	0	native	NA	1	9.82	37.4
Hawai'i Island	2	Zimmerman	1017.88	-154.91	19.444	2003	1	6252	Metrosideros polymorpha	34	1	0	native	NA	1	9.82	36.7
Hawai'i Island	2	Zimmerman	1017.88	-154.91	19.444	2003	1	6253	Metrosideros polymorpha	34	1	0	native	NA	1	9.82	45.9
Hawai'i Island	2	Zimmerman	1017.88	-154.91	19.444	2003	1	6256	Metrosideros polymorpha	34	1	0	native	NA	1	9.82	45
Hawai'i Island	2	Zimmerman	1017.88	-154.91	19.444	2003	1	6258	Metrosideros polymorpha	34	1	0	native	NA	1	39.3	22.5
Hawai'i Island	2	Zimmerman	1017.88	-154.91	19.444	2003	1	6259	Metrosideros polymorpha	34	1	0	native	NA	1	9.82	35.7
Hawai'i Island	2	Zimmerman	1017.88	-154.91	19.444	2003	1	6267	Metrosideros polymorpha	34	1	0	native	NA	1	9.82	30.2
Hawai'i Island	2	Zimmerman	1017.88	-154.91	19.444	2003	1	6268	Metrosideros polymorpha	34	1	0	native	NA	1	9.82	46.2
Hawai'i Island	2	Zimmerman	1017.88	-154.91	19.444	2003	1	6269	Metrosideros polymorpha	34	1	0	native	NA	1	39.3	11
Hawai'i Island	2	Zimmerman	1017.88	-154.91	19.444	2003	1	6270	Metrosideros polymorpha	34	1	0	native	NA	1	9.82	54
Hawai'i Island	2	Zimmerman	1017.88	-154.91	19.444	2003	1	6272	Metrosideros polymorpha	34	1	0	native	NA	1	9.82	36.5
Hawai'i Island	2	Zimmerman	1017.88	-154.91	19.444	2003	1	6281	Metrosideros polymorpha	34	1	0	native	NA	1	9.82	61.5
Hawai'i Island	2	Zimmerman	1017.88	-154.91	19.444	2003	1	6283	Metrosideros polymorpha	34	1	0	native	NA	1	39.3	14.6
Hawai'i Island	2	Zimmerman	1017.88	-154.91	19.444	2003	1	6285	Metrosideros polymorpha	34	1	0	native	NA	1	9.82	40.2
Hawai'i Island	2	Zimmerman	1017.88	-154.91	19.444	2003	1	6290	Metrosideros polymorpha	34	1	0	native	NA	1	9.82	42
Hawai'i Island	2	Zimmerman	1017.88	-154.91	19.444	2003	1	6291	Metrosideros polymorpha	34	1	0	native	NA	1	9.82	32
Hawai'i Island	2	Zimmerman	1017.88	-154.91	19.444	2003	1	6294	Metrosideros polymorpha	34	1	0	native	NA	1	39.3	17.8
Hawai'i Island	2	Zimmerman	1017.88	-154.91	19.444	2003	1	6295	Metrosideros polymorpha	34	1	0	native	NA	1	9.82	39.3
Hawai'i Island	2	Zimmerman	1017.88	-154.91	19.444	2003	1	6297	Metrosideros polymorpha	34	1	0	native	NA	1	9.82	48
Hawai'i Island	2	Zimmerman	1017.88	-154.91	19.444	2003	1	6220	Psidium cattleianum	34	1	0	alien	1	1	39.3	8.9
Hawai'i Island	2	Zimmerman	1017.88	-154.91	19.444	2003	1	6192	Psidium cattleianum	34	1	0	alien	1	1	39.3	8.2
Hawai'i Island	2	Zimmerman	1017.88	-154.91	19.444	2003	1	6218	Psidium cattleianum	34	1	0	alien	1	1	39.3	10.1
Hawai'i Island	2	Zimmerman	1017.88	-154.91	19.444	2003	1	6200	Psidium cattleianum	34	1	0	alien	1	1	39.3	9.8
Hawai'i Island	2	Zimmerman	1017.88	-154.91	19.444	2003	1	6209	Psidium cattleianum	34	1	0	alien	1	1	39.3	7.6
Hawai'i Island	2	Zimmerman	1017.88	-154.91	19.444	2003	1	6228	Psidium cattleianum	34	1	0	alien	1	1	39.3	11.3
Hawai'i Island	2	Zimmerman	1017.88	-154.91	19.444	2003	1	6257	Psidium guajava	34	1	0	alien	1	1	39.3	5
Hawai'i Island	2	Zimmerman	1017.88	-154.91	19.444	2003	1	6212	Psychotria spp.	47	1	0	native	NA	1	39.3	14
Hawai'i Island	2	Zimmerman	1017.88	-154.91	19.444	2003	1	6204	Psychotria spp.	47	1	0	native	NA	1	39.3	5.3
Hawai'i Island	2	Zimmerman	1017.88	-154.91	19.444	2003	1	6240	Psychotria spp.	47	1	0	native	NA	1	39.3	9.3
Hawai'i Island	2	Zimmerman	1017.88	-154.91	19.444	2003	1	6288	Psychotria spp.	47	1	0	native	NA	1	39.3	5.7
Hawai'i Island	2	Zimmerman	1017.88	-154.91	19.444	2003	1	6287	Psychotria spp.	47	1	0	native	NA	1	39.3	5.4
Hawai'i Island	2	Zimmerman	1017.88	-154.91	19.444	2003	1	6261	Psychotria spp.	47	1	0	native	NA	1	39.3	7.5
Hawai'i Island	2	Zimmerman	1017.88	-154.91	19.444	2003	1	6203	Polyscias hawaiensis	6	1	0	native	NA	1	9.82	37.2
Hawai'i Island	3	Zimmerman	1017.88	-154.91	19.444	2003	1	6330	Melastoma malabathricum	30	1	0	alien	1	1	39.3	5.3
Hawai'i Island	3	Zimmerman	1017.88	-154.91	19.444	2003	1	6299	Metrosideros polymorpha	34	1	0	native	NA	1	39.3	8.5
Hawai'i Island	3	Zimmerman	1017.88	-154.91	19.444	2003	1	6303	Metrosideros polymorpha	34	1	0	native	NA	1	39.3	6
Hawai'i Island	3	Zimmerman	1017.88	-154.91	19.444	2003	1	6305	Metrosideros polymorpha	34	1	0	native	NA	1	39.3	6.5
Hawai'i Island	3	Zimmerman	1017.88	-154.91	19.444	2003	1	6308	Metrosideros polymorpha	34	1	0	native	NA	1	39.3	6.9
Hawai'i Island	3	Zimmerman	1017.88	-154.91	19.444	2003	1	6311	Metrosideros polymorpha	34	1	0	native	NA	1	39.3	7.9
Hawai'i Island	3	Zimmerman	1017.88	-154.91	19.444	2003	1	6320	Metrosideros polymorpha	34	1	0	native	NA	1	39.3	20
Hawai'i Island	3	Zimmerman	1017.88	-154.91	19.444	2003	1	6324	Metrosideros polymorpha	34	1	0	native	NA	1	39.3	6.2
Hawai'i Island	3	Zimmerman	1017.88	-154.91	19.444	2003	1	6326	Metrosideros polymorpha	34	1	0	native	NA	1	39.3	6.9
Hawai'i Island	3	Zimmerman	1017.88	-154.91	19.444	2003	1	6331	Metrosideros polymorpha	34	1	0	native	NA	1	39.3	8.3
Hawai'i Island	3	Zimmerman	1017.88	-154.91	19.444	2003	1	6332	Metrosideros polymorpha	34	1	0	native	NA	1	39.3	5.3
Hawai'i Island	3	Zimmerman	1017.88	-154.91	19.444	2003	1	6333	Metrosideros polymorpha	34	1	0	native	NA	1	39.3	10.6
Hawai'i Island	3	Zimmerman	1017.88	-154.91	19.444	2003	1	6335	Metrosideros polymorpha	34	1	0	native	NA	1	39.3	14.8
Hawai'i Island	3	Zimmerman	1017.88	-154.91	19.444	2003	1	6336	Metrosideros polymorpha	34	1	0	native	NA	1	39.3	15.5
Hawai'i Island	3	Zimmerman	1017.88	-154.91	19.444	2003	1	6337	Metrosideros polymorpha	34	1	0	native	NA	1	39.3	6.3
Hawai'i Island	3	Zimmerman	1017.88	-154.91	19.444	2003	1	6339	Metrosideros polymorpha	34	1	0	native	NA	1	39.3	7.5
Hawai'i Island	3	Zimmerman	1017.88	-154.91	19.444	2003	1	6341	Metrosideros polymorpha	34	1	0	native	NA	1	39.3	11
Hawai'i Island	3	Zimmerman	1017.88	-154.91	19.444	2003	1	6345	Metrosideros polymorpha	34	1	0	native	NA	1	39.3	10
Hawai'i Island	3	Zimmerman	1017.88	-154.91	19.444	2003	1	6346	Metrosideros polymorpha	34	1	0	native	NA	1	39.3	5.5
Hawai'i Island	3	Zimmerman	1017.88	-154.91	19.444	2003	1	6347	Metrosideros polymorpha	34	1	0	native	NA	1	39.3	12.3
Hawai'i Island	3	Zimmerman	1017.88	-154.91	19.444	2003	1	6348	Metrosideros polymorpha	34	1	0	native	NA	1	39.3	9.9
Hawai'i Island	3	Zimmerman	1017.88	-154.91	19.444	2003	1	6349	Metrosideros polymorpha	34	1	0	native	NA	1	39.3	10.2
Hawai'i Island	3	Zimmerman	1017.88	-154.91	19.444	2003	1	6350	Metrosideros polymorpha	34	1	0	native	NA	1	39.3	12
Hawai'i Island	3	Zimmerman	1017.88	-154.91	19.444	2003	1	6354	Metrosideros polymorpha	34	1	0	native	NA	1	39.3	18
Hawai'i Island	3	Zimmerman	1017.88	-154.91	19.444	2003	1	6356	Metrosideros polymorpha	34	1	0	native	NA	1	39.3	5.1
Hawai'i Island	3	Zimmerman	1017.88	-154.91	19.444	2003	1	6358	Metrosideros polymorpha	34	1	0	native	NA	1	39.3	5.9
Hawai'i Island	3	Zimmerman	1017.88	-154.91	19.444	2003	1	6359	Metrosideros polymorpha	34	1	0	native	NA	1	39.3	9
Hawai'i Island	3	Zimmerman	1017.88	-154.91	19.444	2003	1	6365	Metrosideros polymorpha	34	1	0	native	NA	1	39.3	11
Hawai'i Island	3	Zimmerman	1017.88	-154.91	19.444	2003	1	6368	Metrosideros polymorpha	34	1	0	native	NA	1	39.3	12.8
Hawai'i Island	3	Zimmerman	1017.88	-154.91	19.444	2003	1	6369	Metrosideros polymorpha	34	1	0	native	NA	1	39.3	6.5
Hawai'i Island	3	Zimmerman	1017.88	-154.91	19.444	2003	1	6372	Metrosideros polymorpha	34	1	0	native	NA	1	39.3	8.1
Hawai'i Island	3	Zimmerman	1017.88	-154.91	19.444	2003	1	6373	Metrosideros polymorpha	34	1	0	native	NA	1	9.82	31.8
Hawai'i Island	3	Zimmerman	1017.88	-154.91	19.444	2003	1	6374	Metrosideros polymorpha	34	1	0	native	NA	1	39.3	8.1
Hawai'i Island	3	Zimmerman	1017.88	-154.91	19.444	2003	1	6377	Metrosideros polymorpha	34	1	0	native	NA	1	39.3	9.2
Hawai'i Island	3	Zimmerman	1017.88	-154.91	19.444	2003	1	6380	Metrosideros polymorpha	34	1	0	native	NA	1	39.3	11.8
Hawai'i Island	3	Zimmerman	1017.88	-154.91	19.444	2003	1	6381	Metrosideros polymorpha	34	1	0	native	NA	1	39.3	6.5
Hawai'i Island	3	Zimmerman	1017.88	-154.91	19.444	2003	1	6382	Metrosideros polymorpha	34	1	0	native	NA	1	39.3	10.2
Hawai'i Island	4	Zimmerman	1017.88	-154.91	19.444	2003	1	6423	Cibotium glaucum	14	0	0	native	NA	1	39.3	22.6
Hawai'i Island	4	Zimmerman	1017.88	-154.91	19.444	2003	1	6419	Cibotium glaucum	14	0	0	native	NA	1	39.3	17.6
Hawai'i Island	4	Zimmerman	1017.88	-154.91	19.444	2003	1	6401	Cibotium glaucum	14	0	0	native	NA	1	39.3	19
Hawai'i Island	4	Zimmerman	1017.88	-154.91	19.444	2003	1	6466	Cibotium glaucum	14	0	0	native	NA	1	39.3	21.5
Hawai'i Island	4	Zimmerman	1017.88	-154.91	19.444	2003	1	6448	Cibotium glaucum	14	0	0	native	NA	1	39.3	13
Hawai'i Island	4	Zimmerman	1017.88	-154.91	19.444	2003	1	6410	Cibotium glaucum	14	0	0	native	NA	1	39.3	18.3
Hawai'i Island	4	Zimmerman	1017.88	-154.91	19.444	2003	1	6447	Cibotium glaucum	14	0	0	native	NA	1	39.3	17
Hawai'i Island	4	Zimmerman	1017.88	-154.91	19.444	2003	1	6467	Cibotium glaucum	14	0	0	native	NA	1	39.3	17.2
Hawai'i Island	4	Zimmerman	1017.88	-154.91	19.444	2003	1	6404	Cibotium glaucum	14	0	0	native	NA	1	39.3	23.1
Hawai'i Island	4	Zimmerman	1017.88	-154.91	19.444	2003	1	6575	Cibotium glaucum	14	0	0	native	NA	1	39.3	9.2
Hawai'i Island	4	Zimmerman	1017.88	-154.91	19.444	2003	1	6393	Cibotium glaucum	14	0	0	native	NA	1	39.3	7.5
Hawai'i Island	4	Zimmerman	1017.88	-154.91	19.444	2003	1	6587	Cibotium glaucum	14	0	0	native	NA	1	39.3	24.9
Hawai'i Island	4	Zimmerman	1017.88	-154.91	19.444	2003	1	6433	Cibotium menziesii	14	0	0	native	NA	1	39.3	18
Hawai'i Island	4	Zimmerman	1017.88	-154.91	19.444	2003	1	6415	Cibotium menziesii	14	0	0	native	NA	1	39.3	12.5
Hawai'i Island	4	Zimmerman	1017.88	-154.91	19.444	2003	1	6553	Cibotium menziesii	14	0	0	native	NA	1	39.3	13.5
Hawai'i Island	4	Zimmerman	1017.88	-154.91	19.444	2003	1	6560	Cibotium menziesii	14	0	0	native	NA	1	39.3	16.2
Hawai'i Island	4	Zimmerman	1017.88	-154.91	19.444	2003	1	6481	Cibotium menziesii	14	0	0	native	NA	1	39.3	9.8
Hawai'i Island	4	Zimmerman	1017.88	-154.91	19.444	2003	1	6521	Cibotium menziesii	14	0	0	native	NA	1	39.3	21.4
Hawai'i Island	4	Zimmerman	1017.88	-154.91	19.444	2003	1	6514	Cibotium menziesii	14	0	0	native	NA	1	39.3	13
Hawai'i Island	4	Zimmerman	1017.88	-154.91	19.444	2003	1	6480	Cibotium menziesii	14	0	0	native	NA	1	39.3	11
Hawai'i Island	4	Zimmerman	1017.88	-154.91	19.444	2003	1	6503	Cibotium menziesii	14	0	0	native	NA	1	39.3	29.8
Hawai'i Island	4	Zimmerman	1017.88	-154.91	19.444	2003	1	6550	Cibotium menziesii	14	0	0	native	NA	1	39.3	11
Hawai'i Island	4	Zimmerman	1017.88	-154.91	19.444	2003	1	6413	Cibotium menziesii	14	0	0	native	NA	1	39.3	21
Hawai'i Island	4	Zimmerman	1017.88	-154.91	19.444	2003	1	6416	Cibotium menziesii	14	0	0	native	NA	1	39.3	11.5
Hawai'i Island	4	Zimmerman	1017.88	-154.91	19.444	2003	1	6570	Cibotium menziesii	14	0	0	native	NA	1	39.3	9.7
Hawai'i Island	4	Zimmerman	1017.88	-154.91	19.444	2003	1	6478	Cibotium menziesii	14	0	0	native	NA	1	39.3	18
Hawai'i Island	4	Zimmerman	1017.88	-154.91	19.444	2003	1	6409	Cibotium menziesii	14	0	0	native	NA	1	39.3	15.1
Hawai'i Island	4	Zimmerman	1017.88	-154.91	19.444	2003	1	6459	Cibotium menziesii	14	0	0	native	NA	1	9.82	33.3
Hawai'i Island	4	Zimmerman	1017.88	-154.91	19.444	2003	1	6474	Cibotium menziesii	14	0	0	native	NA	1	39.3	14
Hawai'i Island	4	Zimmerman	1017.88	-154.91	19.444	2003	1	6585	Cibotium menziesii	14	0	0	native	NA	1	39.3	19
Hawai'i Island	4	Zimmerman	1017.88	-154.91	19.444	2003	1	6403	Cibotium menziesii	14	0	0	native	NA	1	39.3	17.2
Hawai'i Island	4	Zimmerman	1017.88	-154.91	19.444	2003	1	6440	Cibotium menziesii	14	0	0	native	NA	1	39.3	24
Hawai'i Island	4	Zimmerman	1017.88	-154.91	19.444	2003	1	6525	Cibotium menziesii	14	0	0	native	NA	1	39.3	23
Hawai'i Island	4	Zimmerman	1017.88	-154.91	19.444	2003	1	6530	Cibotium menziesii	14	0	0	native	NA	1	39.3	26.3
Hawai'i Island	4	Zimmerman	1017.88	-154.91	19.444	2003	1	6390	Cibotium menziesii	14	0	0	native	NA	1	39.3	11
Hawai'i Island	4	Zimmerman	1017.88	-154.91	19.444	2003	1	6534	Cibotium menziesii	14	0	0	native	NA	1	9.82	31
Hawai'i Island	4	Zimmerman	1017.88	-154.91	19.444	2003	1	6566	Cibotium spp.	14	0	0	native	NA	1	39.3	6.7
Hawai'i Island	4	Zimmerman	1017.88	-154.91	19.444	2003	1	6546	Cibotium spp.	14	0	0	native	NA	1	39.3	6
Hawai'i Island	4	Zimmerman	1017.88	-154.91	19.444	2003	1	6493	Diospyros sandwicensis	21	1	0	native	NA	1	39.3	7.9
Hawai'i Island	4	Zimmerman	1017.88	-154.91	19.444	2003	1	6399	Melastoma malabathricum	30	1	0	alien	1	1	39.3	5.8
Hawai'i Island	4	Zimmerman	1017.88	-154.91	19.444	2003	1	6387	Melastoma malabathricum	30	1	0	alien	1	1	39.3	8.5
Hawai'i Island	4	Zimmerman	1017.88	-154.91	19.444	2003	1	6504	Melastoma malabathricum	30	1	0	alien	1	1	39.3	5.5
Hawai'i Island	4	Zimmerman	1017.88	-154.91	19.444	2003	1	6500	Melastoma malabathricum	30	1	0	alien	1	1	39.3	6.6
Hawai'i Island	4	Zimmerman	1017.88	-154.91	19.444	2003	1	6540	Melastoma malabathricum	30	1	0	alien	1	1	39.3	6.2
Hawai'i Island	4	Zimmerman	1017.88	-154.91	19.444	2003	1	6445	Metrosideros polymorpha	34	1	0	native	NA	1	39.3	27
Hawai'i Island	4	Zimmerman	1017.88	-154.91	19.444	2003	1	6472	Metrosideros polymorpha	34	1	0	native	NA	1	39.3	13.9
Hawai'i Island	4	Zimmerman	1017.88	-154.91	19.444	2003	1	6548	Metrosideros polymorpha	34	1	0	native	NA	1	9.82	93.3
Hawai'i Island	4	Zimmerman	1017.88	-154.91	19.444	2003	1	6389	Psidium cattleianum	34	1	0	alien	1	1	39.3	7.9
Hawai'i Island	4	Zimmerman	1017.88	-154.91	19.444	2003	1	6394	Psidium cattleianum	34	1	0	alien	1	1	39.3	5
Hawai'i Island	4	Zimmerman	1017.88	-154.91	19.444	2003	1	6412	Psidium cattleianum	34	1	0	alien	1	1	39.3	18.8
Hawai'i Island	4	Zimmerman	1017.88	-154.91	19.444	2003	1	6391	Psidium cattleianum	34	1	0	alien	1	1	39.3	9
Hawai'i Island	4	Zimmerman	1017.88	-154.91	19.444	2003	1	6427	Psidium cattleianum	34	1	0	alien	1	1	39.3	5.1
Hawai'i Island	4	Zimmerman	1017.88	-154.91	19.444	2003	1	6398	Psidium cattleianum	34	1	0	alien	1	1	39.3	6.7
Hawai'i Island	4	Zimmerman	1017.88	-154.91	19.444	2003	1	6397	Psidium cattleianum	34	1	0	alien	1	1	39.3	10.5
Hawai'i Island	4	Zimmerman	1017.88	-154.91	19.444	2003	1	6435	Psidium cattleianum	34	1	0	alien	1	1	39.3	12.2
Hawai'i Island	4	Zimmerman	1017.88	-154.91	19.444	2003	1	6424	Psidium cattleianum	34	1	0	alien	1	1	39.3	7.2
Hawai'i Island	4	Zimmerman	1017.88	-154.91	19.444	2003	1	6386	Psidium cattleianum	34	1	0	alien	1	1	39.3	6.4
Hawai'i Island	4	Zimmerman	1017.88	-154.91	19.444	2003	1	6385	Psidium cattleianum	34	1	0	alien	1	1	39.3	7.6
Hawai'i Island	4	Zimmerman	1017.88	-154.91	19.444	2003	1	6383	Psidium cattleianum	34	1	0	alien	1	1	39.3	6
Hawai'i Island	4	Zimmerman	1017.88	-154.91	19.444	2003	1	6411	Psidium cattleianum	34	1	0	alien	1	1	39.3	12.3
Hawai'i Island	4	Zimmerman	1017.88	-154.91	19.444	2003	1	6431	Psidium cattleianum	34	1	0	alien	1	1	39.3	8.3
Hawai'i Island	4	Zimmerman	1017.88	-154.91	19.444	2003	1	6408	Psidium cattleianum	34	1	0	alien	1	1	39.3	9.2
Hawai'i Island	4	Zimmerman	1017.88	-154.91	19.444	2003	1	6512	Psidium cattleianum	34	1	0	alien	1	1	39.3	7.9
Hawai'i Island	4	Zimmerman	1017.88	-154.91	19.444	2003	1	6523	Psidium cattleianum	34	1	0	alien	1	1	39.3	6.3
Hawai'i Island	4	Zimmerman	1017.88	-154.91	19.444	2003	1	6444	Psidium cattleianum	34	1	0	alien	1	1	39.3	5.5
Hawai'i Island	4	Zimmerman	1017.88	-154.91	19.444	2003	1	6451	Psidium cattleianum	34	1	0	alien	1	1	39.3	12.8
Hawai'i Island	4	Zimmerman	1017.88	-154.91	19.444	2003	1	6450	Psidium cattleianum	34	1	0	alien	1	1	39.3	6.8
Hawai'i Island	4	Zimmerman	1017.88	-154.91	19.444	2003	1	6582	Psidium cattleianum	34	1	0	alien	1	1	39.3	7.1
Hawai'i Island	4	Zimmerman	1017.88	-154.91	19.444	2003	1	6583	Psidium cattleianum	34	1	0	alien	1	1	39.3	6.8
Hawai'i Island	4	Zimmerman	1017.88	-154.91	19.444	2003	1	6522	Psidium cattleianum	34	1	0	alien	1	1	39.3	5.1
Hawai'i Island	4	Zimmerman	1017.88	-154.91	19.444	2003	1	6463	Psidium cattleianum	34	1	0	alien	1	1	39.3	7.5
Hawai'i Island	4	Zimmerman	1017.88	-154.91	19.444	2003	1	6552	Psidium cattleianum	34	1	0	alien	1	1	39.3	5
Hawai'i Island	4	Zimmerman	1017.88	-154.91	19.444	2003	1	6449	Psidium cattleianum	34	1	0	alien	1	1	39.3	8.9
Hawai'i Island	4	Zimmerman	1017.88	-154.91	19.444	2003	1	6584	Psidium cattleianum	34	1	0	alien	1	1	39.3	5.7
Hawai'i Island	4	Zimmerman	1017.88	-154.91	19.444	2003	1	6545	Psidium cattleianum	34	1	0	alien	1	1	39.3	8
Hawai'i Island	4	Zimmerman	1017.88	-154.91	19.444	2003	1	6555	Psidium cattleianum	34	1	0	alien	1	1	39.3	8.9
Hawai'i Island	4	Zimmerman	1017.88	-154.91	19.444	2003	1	6541	Psidium cattleianum	34	1	0	alien	1	1	39.3	5
Hawai'i Island	4	Zimmerman	1017.88	-154.91	19.444	2003	1	6549	Psidium cattleianum	34	1	0	alien	1	1	39.3	9
Hawai'i Island	4	Zimmerman	1017.88	-154.91	19.444	2003	1	6513	Psidium cattleianum	34	1	0	alien	1	1	39.3	8.6
Hawai'i Island	4	Zimmerman	1017.88	-154.91	19.444	2003	1	6532	Psidium cattleianum	34	1	0	alien	1	1	39.3	5.4
Hawai'i Island	4	Zimmerman	1017.88	-154.91	19.444	2003	1	6461	Psidium cattleianum	34	1	0	alien	1	1	39.3	8.7
Hawai'i Island	4	Zimmerman	1017.88	-154.91	19.444	2003	1	6536	Psidium cattleianum	34	1	0	alien	1	1	39.3	12.2
Hawai'i Island	4	Zimmerman	1017.88	-154.91	19.444	2003	1	6462	Psidium cattleianum	34	1	0	alien	1	1	39.3	6.4
Hawai'i Island	4	Zimmerman	1017.88	-154.91	19.444	2003	1	6542	Psidium cattleianum	34	1	0	alien	1	1	39.3	7.8
Hawai'i Island	4	Zimmerman	1017.88	-154.91	19.444	2003	1	6488	Psidium cattleianum	34	1	0	alien	1	1	39.3	8.1
Hawai'i Island	4	Zimmerman	1017.88	-154.91	19.444	2003	1	6580	Psidium cattleianum	34	1	0	alien	1	1	39.3	8.8
Hawai'i Island	4	Zimmerman	1017.88	-154.91	19.444	2003	1	6574	Psidium cattleianum	34	1	0	alien	1	1	39.3	10.2
Hawai'i Island	4	Zimmerman	1017.88	-154.91	19.444	2003	1	6454	Psidium cattleianum	34	1	0	alien	1	1	39.3	10.8
Hawai'i Island	4	Zimmerman	1017.88	-154.91	19.444	2003	1	6517	Psidium cattleianum	34	1	0	alien	1	1	39.3	14.9
Hawai'i Island	4	Zimmerman	1017.88	-154.91	19.444	2003	1	6470	Psidium cattleianum	34	1	0	alien	1	1	39.3	6.5
Hawai'i Island	4	Zimmerman	1017.88	-154.91	19.444	2003	1	6506	Psidium cattleianum	34	1	0	alien	1	1	39.3	12.3
Hawai'i Island	4	Zimmerman	1017.88	-154.91	19.444	2003	1	6508	Psidium cattleianum	34	1	0	alien	1	1	39.3	6.7
Hawai'i Island	4	Zimmerman	1017.88	-154.91	19.444	2003	1	6505	Psidium cattleianum	34	1	0	alien	1	1	39.3	8.6
Hawai'i Island	4	Zimmerman	1017.88	-154.91	19.444	2003	1	6511	Psidium cattleianum	34	1	0	alien	1	1	39.3	8
Hawai'i Island	4	Zimmerman	1017.88	-154.91	19.444	2003	1	6501	Psidium cattleianum	34	1	0	alien	1	1	39.3	10.2
Hawai'i Island	4	Zimmerman	1017.88	-154.91	19.444	2003	1	6510	Psidium cattleianum	34	1	0	alien	1	1	39.3	8.2
Hawai'i Island	4	Zimmerman	1017.88	-154.91	19.444	2003	1	6499	Psidium cattleianum	34	1	0	alien	1	1	39.3	7.1
Hawai'i Island	4	Zimmerman	1017.88	-154.91	19.444	2003	1	6569	Psidium guajava	34	1	0	alien	1	1	39.3	9
Hawai'i Island	4	Zimmerman	1017.88	-154.91	19.444	2003	1	6465	Psychotria spp.	47	1	0	native	NA	1	39.3	13.3
Hawai'i Island	4	Zimmerman	1017.88	-154.91	19.444	2003	1	6577	Psychotria spp.	47	1	0	native	NA	1	39.3	6.3
Hawai'i Island	5	Zimmerman	1017.88	-154.91	19.444	2003	1	6619	Cibotium glaucum	14	0	0	native	NA	1	39.3	14
Hawai'i Island	5	Zimmerman	1017.88	-154.91	19.444	2003	1	6677	Cibotium glaucum	14	0	0	native	NA	1	39.3	15.2
Hawai'i Island	5	Zimmerman	1017.88	-154.91	19.444	2003	1	6687	Cibotium glaucum	14	0	0	native	NA	1	39.3	7.1
Hawai'i Island	5	Zimmerman	1017.88	-154.91	19.444	2003	1	6686	Cibotium glaucum	14	0	0	native	NA	1	39.3	14.1
Hawai'i Island	5	Zimmerman	1017.88	-154.91	19.444	2003	1	6719	Cibotium glaucum	14	0	0	native	NA	1	39.3	12.8
Hawai'i Island	5	Zimmerman	1017.88	-154.91	19.444	2003	1	6604	Cibotium glaucum	14	0	0	native	NA	1	39.3	11
Hawai'i Island	5	Zimmerman	1017.88	-154.91	19.444	2003	1	6590	Metrosideros polymorpha	34	1	0	native	NA	1	9.82	46
Hawai'i Island	5	Zimmerman	1017.88	-154.91	19.444	2003	1	6596	Metrosideros polymorpha	34	1	0	native	NA	1	9.82	46
Hawai'i Island	5	Zimmerman	1017.88	-154.91	19.444	2003	1	6605	Metrosideros polymorpha	34	1	0	native	NA	1	9.82	57.4
Hawai'i Island	5	Zimmerman	1017.88	-154.91	19.444	2003	1	6606	Metrosideros polymorpha	34	1	0	native	NA	1	9.82	47
Hawai'i Island	5	Zimmerman	1017.88	-154.91	19.444	2003	1	6624	Metrosideros polymorpha	34	1	0	native	NA	1	9.82	37.2
Hawai'i Island	5	Zimmerman	1017.88	-154.91	19.444	2003	1	6631	Metrosideros polymorpha	34	1	0	native	NA	1	39.3	9.8
Hawai'i Island	5	Zimmerman	1017.88	-154.91	19.444	2003	1	6636	Metrosideros polymorpha	34	1	0	native	NA	1	9.82	32.3
Hawai'i Island	5	Zimmerman	1017.88	-154.91	19.444	2003	1	6637	Metrosideros polymorpha	34	1	0	native	NA	1	9.82	31.8
Hawai'i Island	5	Zimmerman	1017.88	-154.91	19.444	2003	1	6638	Metrosideros polymorpha	34	1	0	native	NA	1	39.3	9.6
Hawai'i Island	5	Zimmerman	1017.88	-154.91	19.444	2003	1	6641	Metrosideros polymorpha	34	1	0	native	NA	1	9.82	44.4
Hawai'i Island	5	Zimmerman	1017.88	-154.91	19.444	2003	1	6642	Metrosideros polymorpha	34	1	0	native	NA	1	9.82	31.2
Hawai'i Island	5	Zimmerman	1017.88	-154.91	19.444	2003	1	6643	Metrosideros polymorpha	34	1	0	native	NA	1	9.82	43.5
Hawai'i Island	5	Zimmerman	1017.88	-154.91	19.444	2003	1	6647	Metrosideros polymorpha	34	1	0	native	NA	1	9.82	39
Hawai'i Island	5	Zimmerman	1017.88	-154.91	19.444	2003	1	6648	Metrosideros polymorpha	34	1	0	native	NA	1	9.82	52.6
Hawai'i Island	5	Zimmerman	1017.88	-154.91	19.444	2003	1	6649	Metrosideros polymorpha	34	1	0	native	NA	1	9.82	30.2
Hawai'i Island	5	Zimmerman	1017.88	-154.91	19.444	2003	1	6658	Metrosideros polymorpha	34	1	0	native	NA	1	9.82	36
Hawai'i Island	5	Zimmerman	1017.88	-154.91	19.444	2003	1	6667	Metrosideros polymorpha	34	1	0	native	NA	1	9.82	85.6
Hawai'i Island	5	Zimmerman	1017.88	-154.91	19.444	2003	1	6670	Metrosideros polymorpha	34	1	0	native	NA	1	9.82	36
Hawai'i Island	5	Zimmerman	1017.88	-154.91	19.444	2003	1	6671	Metrosideros polymorpha	34	1	0	native	NA	1	9.82	44.8
Hawai'i Island	5	Zimmerman	1017.88	-154.91	19.444	2003	1	6672	Metrosideros polymorpha	34	1	0	native	NA	1	9.82	31.2
Hawai'i Island	5	Zimmerman	1017.88	-154.91	19.444	2003	1	6674	Metrosideros polymorpha	34	1	0	native	NA	1	9.82	35.8
Hawai'i Island	5	Zimmerman	1017.88	-154.91	19.444	2003	1	6676	Metrosideros polymorpha	34	1	0	native	NA	1	39.3	15.7
Hawai'i Island	5	Zimmerman	1017.88	-154.91	19.444	2003	1	6679	Metrosideros polymorpha	34	1	0	native	NA	1	9.82	55
Hawai'i Island	5	Zimmerman	1017.88	-154.91	19.444	2003	1	6685	Metrosideros polymorpha	34	1	0	native	NA	1	9.82	39.3
Hawai'i Island	5	Zimmerman	1017.88	-154.91	19.444	2003	1	6690	Metrosideros polymorpha	34	1	0	native	NA	1	9.82	42.2
Hawai'i Island	5	Zimmerman	1017.88	-154.91	19.444	2003	1	6695	Metrosideros polymorpha	34	1	0	native	NA	1	39.3	25.7
Hawai'i Island	5	Zimmerman	1017.88	-154.91	19.444	2003	1	6700	Metrosideros polymorpha	34	1	0	native	NA	1	9.82	39.9
Hawai'i Island	5	Zimmerman	1017.88	-154.91	19.444	2003	1	6701	Metrosideros polymorpha	34	1	0	native	NA	1	39.3	28.7
Hawai'i Island	5	Zimmerman	1017.88	-154.91	19.444	2003	1	6702	Metrosideros polymorpha	34	1	0	native	NA	1	39.3	14.5
Hawai'i Island	5	Zimmerman	1017.88	-154.91	19.444	2003	1	6707	Metrosideros polymorpha	34	1	0	native	NA	1	9.82	36.2
Hawai'i Island	5	Zimmerman	1017.88	-154.91	19.444	2003	1	6711	Metrosideros polymorpha	34	1	0	native	NA	1	39.3	27
Hawai'i Island	5	Zimmerman	1017.88	-154.91	19.444	2003	1	6712	Metrosideros polymorpha	34	1	0	native	NA	1	9.82	50
Hawai'i Island	5	Zimmerman	1017.88	-154.91	19.444	2003	1	6715	Metrosideros polymorpha	34	1	0	native	NA	1	9.82	64.3
Hawai'i Island	5	Zimmerman	1017.88	-154.91	19.444	2003	1	6716	Metrosideros polymorpha	34	1	0	native	NA	1	9.82	41.6
Hawai'i Island	5	Zimmerman	1017.88	-154.91	19.444	2003	1	6722	Metrosideros polymorpha	34	1	0	native	NA	1	9.82	33.7
Hawai'i Island	5	Zimmerman	1017.88	-154.91	19.444	2003	1	6725	Metrosideros polymorpha	34	1	0	native	NA	1	9.82	44.6
Hawai'i Island	5	Zimmerman	1017.88	-154.91	19.444	2003	1	6726	Metrosideros polymorpha	34	1	0	native	NA	1	39.3	21.2
Hawai'i Island	5	Zimmerman	1017.88	-154.91	19.444	2003	1	6730	Metrosideros polymorpha	34	1	0	native	NA	1	9.82	44
Hawai'i Island	5	Zimmerman	1017.88	-154.91	19.444	2003	1	6732	Metrosideros polymorpha	34	1	0	native	NA	1	9.82	30
Hawai'i Island	5	Zimmerman	1017.88	-154.91	19.444	2003	1	6734	Metrosideros polymorpha	34	1	0	native	NA	1	9.82	37
Hawai'i Island	5	Zimmerman	1017.88	-154.91	19.444	2003	1	6735	Metrosideros polymorpha	34	1	0	native	NA	1	9.82	54.3
Hawai'i Island	5	Zimmerman	1017.88	-154.91	19.444	2003	1	6627	Psidium cattleianum	34	1	0	alien	1	1	39.3	9.9
Hawai'i Island	5	Zimmerman	1017.88	-154.91	19.444	2003	1	6621	Psidium cattleianum	34	1	0	alien	1	1	39.3	8.9
Hawai'i Island	5	Zimmerman	1017.88	-154.91	19.444	2003	1	6618	Psidium cattleianum	34	1	0	alien	1	1	39.3	6.5
Hawai'i Island	5	Zimmerman	1017.88	-154.91	19.444	2003	1	6607	Psidium cattleianum	34	1	0	alien	1	1	39.3	12
Hawai'i Island	5	Zimmerman	1017.88	-154.91	19.444	2003	1	6620	Psidium cattleianum	34	1	0	alien	1	1	39.3	8
Hawai'i Island	5	Zimmerman	1017.88	-154.91	19.444	2003	1	6625	Psidium cattleianum	34	1	0	alien	1	1	39.3	7.7
Hawai'i Island	5	Zimmerman	1017.88	-154.91	19.444	2003	1	6613	Psidium cattleianum	34	1	0	alien	1	1	39.3	5.9
Hawai'i Island	5	Zimmerman	1017.88	-154.91	19.444	2003	1	6697	Psidium cattleianum	34	1	0	alien	1	1	39.3	8.2
Hawai'i Island	5	Zimmerman	1017.88	-154.91	19.444	2003	1	6664	Psidium cattleianum	34	1	0	alien	1	1	39.3	13.5
Hawai'i Island	5	Zimmerman	1017.88	-154.91	19.444	2003	1	6612	Psidium cattleianum	34	1	0	alien	1	1	39.3	5.3
Hawai'i Island	5	Zimmerman	1017.88	-154.91	19.444	2003	1	6665	Psidium cattleianum	34	1	0	alien	1	1	39.3	9.8
Hawai'i Island	5	Zimmerman	1017.88	-154.91	19.444	2003	1	6646	Psidium cattleianum	34	1	0	alien	1	1	39.3	9
Hawai'i Island	5	Zimmerman	1017.88	-154.91	19.444	2003	1	6614	Psidium cattleianum	34	1	0	alien	1	1	39.3	10.1
Hawai'i Island	5	Zimmerman	1017.88	-154.91	19.444	2003	1	6659	Psidium cattleianum	34	1	0	alien	1	1	39.3	11.3
Hawai'i Island	5	Zimmerman	1017.88	-154.91	19.444	2003	1	6640	Psidium cattleianum	34	1	0	alien	1	1	39.3	5.7
Hawai'i Island	5	Zimmerman	1017.88	-154.91	19.444	2003	1	6616	Psidium cattleianum	34	1	0	alien	1	1	39.3	14.4
Hawai'i Island	5	Zimmerman	1017.88	-154.91	19.444	2003	1	6639	Psidium cattleianum	34	1	0	alien	1	1	39.3	9.9
Hawai'i Island	5	Zimmerman	1017.88	-154.91	19.444	2003	1	6651	Psidium cattleianum	34	1	0	alien	1	1	39.3	11.8
Hawai'i Island	5	Zimmerman	1017.88	-154.91	19.444	2003	1	6594	Psidium cattleianum	34	1	0	alien	1	1	39.3	7.4
Hawai'i Island	5	Zimmerman	1017.88	-154.91	19.444	2003	1	6611	Psidium cattleianum	34	1	0	alien	1	1	39.3	9.1
Hawai'i Island	5	Zimmerman	1017.88	-154.91	19.444	2003	1	6650	Psidium cattleianum	34	1	0	alien	1	1	39.3	9
Hawai'i Island	5	Zimmerman	1017.88	-154.91	19.444	2003	1	6696	Psidium cattleianum	34	1	0	alien	1	1	39.3	11.4
Hawai'i Island	5	Zimmerman	1017.88	-154.91	19.444	2003	1	6632	Psidium cattleianum	34	1	0	alien	1	1	39.3	10
Hawai'i Island	5	Zimmerman	1017.88	-154.91	19.444	2003	1	6609	Psidium cattleianum	34	1	0	alien	1	1	39.3	13.3
Hawai'i Island	5	Zimmerman	1017.88	-154.91	19.444	2003	1	6657	Psidium cattleianum	34	1	0	alien	1	1	39.3	10
Hawai'i Island	5	Zimmerman	1017.88	-154.91	19.444	2003	1	6655	Psidium cattleianum	34	1	0	alien	1	1	39.3	7.8
Hawai'i Island	5	Zimmerman	1017.88	-154.91	19.444	2003	1	6622	Psidium cattleianum	34	1	0	alien	1	1	39.3	7.6
Hawai'i Island	5	Zimmerman	1017.88	-154.91	19.444	2003	1	6710	Psidium cattleianum	34	1	0	alien	1	1	39.3	9
Hawai'i Island	5	Zimmerman	1017.88	-154.91	19.444	2003	1	6644	Psidium cattleianum	34	1	0	alien	1	1	39.3	8.9
Hawai'i Island	5	Zimmerman	1017.88	-154.91	19.444	2003	1	6661	Psidium cattleianum	34	1	0	alien	1	1	39.3	5.8
Hawai'i Island	5	Zimmerman	1017.88	-154.91	19.444	2003	1	6592	Psidium cattleianum	34	1	0	alien	1	1	39.3	5.7
Hawai'i Island	5	Zimmerman	1017.88	-154.91	19.444	2003	1	6628	Psidium cattleianum	34	1	0	alien	1	1	39.3	5.7
Hawai'i Island	5	Zimmerman	1017.88	-154.91	19.444	2003	1	6708	Psidium cattleianum	34	1	0	alien	1	1	39.3	10.8
Hawai'i Island	5	Zimmerman	1017.88	-154.91	19.444	2003	1	6705	Psidium cattleianum	34	1	0	alien	1	1	39.3	8.8
Hawai'i Island	5	Zimmerman	1017.88	-154.91	19.444	2003	1	6706	Psidium cattleianum	34	1	0	alien	1	1	39.3	6.5
Hawai'i Island	5	Zimmerman	1017.88	-154.91	19.444	2003	1	6709	Psidium cattleianum	34	1	0	alien	1	1	39.3	6.5
Hawai'i Island	5	Zimmerman	1017.88	-154.91	19.444	2003	1	6720	Psidium cattleianum	34	1	0	alien	1	1	39.3	5.5
Hawai'i Island	5	Zimmerman	1017.88	-154.91	19.444	2003	1	6593	Psidium cattleianum	34	1	0	alien	1	1	39.3	6.8
Hawai'i Island	5	Zimmerman	1017.88	-154.91	19.444	2003	1	6736	Psidium cattleianum	34	1	0	alien	1	1	39.3	5.5
Hawai'i Island	5	Zimmerman	1017.88	-154.91	19.444	2003	1	6692	Psidium cattleianum	34	1	0	alien	1	1	39.3	10.2
Hawai'i Island	5	Zimmerman	1017.88	-154.91	19.444	2003	1	6589	Psidium cattleianum	34	1	0	alien	1	1	39.3	9.5
Hawai'i Island	5	Zimmerman	1017.88	-154.91	19.444	2003	1	6713	Psidium cattleianum	34	1	0	alien	1	1	39.3	9.1
Hawai'i Island	5	Zimmerman	1017.88	-154.91	19.444	2003	1	6600	Psidium cattleianum	34	1	0	alien	1	1	39.3	5.7
Hawai'i Island	5	Zimmerman	1017.88	-154.91	19.444	2003	1	6591	Psidium cattleianum	34	1	0	alien	1	1	39.3	6.6
Hawai'i Island	5	Zimmerman	1017.88	-154.91	19.444	2003	1	6723	Psidium cattleianum	34	1	0	alien	1	1	39.3	11.8
Hawai'i Island	5	Zimmerman	1017.88	-154.91	19.444	2003	1	6737	Psidium cattleianum	34	1	0	alien	1	1	39.3	6.3
Hawai'i Island	5	Zimmerman	1017.88	-154.91	19.444	2003	1	6704	Psidium cattleianum	34	1	0	alien	1	1	39.3	5.5
Hawai'i Island	5	Zimmerman	1017.88	-154.91	19.444	2003	1	6727	Psidium cattleianum	34	1	0	alien	1	1	39.3	10
Hawai'i Island	5	Zimmerman	1017.88	-154.91	19.444	2003	1	6721	Psidium cattleianum	34	1	0	alien	1	1	39.3	5.2
Hawai'i Island	5	Zimmerman	1017.88	-154.91	19.444	2003	1	6623	Psychotria spp.	47	1	0	native	NA	1	39.3	8.2
Hawai'i Island	5	Zimmerman	1017.88	-154.91	19.444	2003	1	6626	Psychotria spp.	47	1	0	native	NA	1	39.3	7
Hawai'i Island	5	Zimmerman	1017.88	-154.91	19.444	2003	1	6731	Psychotria spp.	47	1	0	native	NA	1	39.3	8.2
Hawai'i Island	6	Zimmerman	1017.88	-154.91	19.444	2003	1	6783	Aleurites moluccanus	23	1	0	alien	1	1	9.82	33.9
Hawai'i Island	6	Zimmerman	1017.88	-154.91	19.444	2003	1	6834	Aleurites moluccanus	23	1	0	alien	1	1	39.3	7.8
Hawai'i Island	6	Zimmerman	1017.88	-154.91	19.444	2003	1	6822	Aleurites moluccanus	23	1	0	alien	1	1	39.3	15.5
Hawai'i Island	6	Zimmerman	1017.88	-154.91	19.444	2003	1	6763	Aleurites moluccanus	23	1	0	alien	1	1	9.82	37.5
Hawai'i Island	6	Zimmerman	1017.88	-154.91	19.444	2003	1	6744	Aleurites moluccanus	23	1	0	alien	1	1	9.82	30.3
Hawai'i Island	6	Zimmerman	1017.88	-154.91	19.444	2003	1	6742	Aleurites moluccanus	23	1	0	alien	1	1	39.3	24.7
Hawai'i Island	6	Zimmerman	1017.88	-154.91	19.444	2003	1	6825	Aleurites moluccanus	23	1	0	alien	1	1	9.82	40.3
Hawai'i Island	6	Zimmerman	1017.88	-154.91	19.444	2003	1	6830	Cibotium glaucum	14	0	0	native	NA	1	39.3	6
Hawai'i Island	6	Zimmerman	1017.88	-154.91	19.444	2003	1	6819	Cibotium glaucum	14	0	0	native	NA	1	39.3	6.9
Hawai'i Island	6	Zimmerman	1017.88	-154.91	19.444	2003	1	6806	Cibotium glaucum	14	0	0	native	NA	1	39.3	10.5
Hawai'i Island	6	Zimmerman	1017.88	-154.91	19.444	2003	1	6755	Cibotium glaucum	14	0	0	native	NA	1	39.3	7.3
Hawai'i Island	6	Zimmerman	1017.88	-154.91	19.444	2003	1	6752	Cibotium glaucum	14	0	0	native	NA	1	39.3	21
Hawai'i Island	6	Zimmerman	1017.88	-154.91	19.444	2003	1	6837	Cibotium glaucum	14	0	0	native	NA	1	39.3	18.1
Hawai'i Island	6	Zimmerman	1017.88	-154.91	19.444	2003	1	6836	Cibotium glaucum	14	0	0	native	NA	1	39.3	18.8
Hawai'i Island	6	Zimmerman	1017.88	-154.91	19.444	2003	1	6746	Cibotium glaucum	14	0	0	native	NA	1	9.82	34.2
Hawai'i Island	6	Zimmerman	1017.88	-154.91	19.444	2003	1	6751	Cibotium glaucum	14	0	0	native	NA	1	39.3	18.1
Hawai'i Island	6	Zimmerman	1017.88	-154.91	19.444	2003	1	6745	Cibotium glaucum	14	0	0	native	NA	1	39.3	23
Hawai'i Island	6	Zimmerman	1017.88	-154.91	19.444	2003	1	6839	Cibotium glaucum	14	0	0	native	NA	1	39.3	17.7
Hawai'i Island	6	Zimmerman	1017.88	-154.91	19.444	2003	1	6782	Cibotium glaucum	14	0	0	native	NA	1	39.3	21
Hawai'i Island	6	Zimmerman	1017.88	-154.91	19.444	2003	1	6838	Cibotium glaucum	14	0	0	native	NA	1	39.3	21.9
Hawai'i Island	6	Zimmerman	1017.88	-154.91	19.444	2003	1	6739	Cibotium glaucum	14	0	0	native	NA	1	39.3	15.4
Hawai'i Island	6	Zimmerman	1017.88	-154.91	19.444	2003	1	6774	Cibotium glaucum	14	0	0	native	NA	1	39.3	21.2
Hawai'i Island	6	Zimmerman	1017.88	-154.91	19.444	2003	1	6815	Cibotium menziesii	14	0	0	native	NA	1	39.3	14.3
Hawai'i Island	6	Zimmerman	1017.88	-154.91	19.444	2003	1	6835	Cibotium menziesii	14	0	0	native	NA	1	39.3	14
Hawai'i Island	6	Zimmerman	1017.88	-154.91	19.444	2003	1	6760	Cibotium menziesii	14	0	0	native	NA	1	9.82	33.3
Hawai'i Island	6	Zimmerman	1017.88	-154.91	19.444	2003	1	6750	Cibotium menziesii	14	0	0	native	NA	1	39.3	20.7
Hawai'i Island	6	Zimmerman	1017.88	-154.91	19.444	2003	1	6801	Cibotium menziesii	14	0	0	native	NA	1	39.3	34
Hawai'i Island	6	Zimmerman	1017.88	-154.91	19.444	2003	1	6793	Cibotium menziesii	14	0	0	native	NA	1	39.3	22
Hawai'i Island	6	Zimmerman	1017.88	-154.91	19.444	2003	1	6747	Cibotium menziesii	14	0	0	native	NA	1	39.3	8.8
Hawai'i Island	6	Zimmerman	1017.88	-154.91	19.444	2003	1	6753	Cibotium menziesii	14	0	0	native	NA	1	39.3	15.7
Hawai'i Island	6	Zimmerman	1017.88	-154.91	19.444	2003	1	6773	Cibotium menziesii	14	0	0	native	NA	1	39.3	19.9
Hawai'i Island	6	Zimmerman	1017.88	-154.91	19.444	2003	1	6768	Cibotium menziesii	14	0	0	native	NA	1	39.3	18.2
Hawai'i Island	6	Zimmerman	1017.88	-154.91	19.444	2003	1	6799	Falcataria moluccana	28	1	0	alien	1	1	9.82	57.2
Hawai'i Island	6	Zimmerman	1017.88	-154.91	19.444	2003	1	6809	Falcataria moluccana	28	1	0	alien	1	1	9.82	31
Hawai'i Island	6	Zimmerman	1017.88	-154.91	19.444	2003	1	6738	Metrosideros polymorpha	34	1	0	native	NA	1	9.82	53.3
Hawai'i Island	6	Zimmerman	1017.88	-154.91	19.444	2003	1	6749	Metrosideros polymorpha	34	1	0	native	NA	1	9.82	44.7
Hawai'i Island	6	Zimmerman	1017.88	-154.91	19.444	2003	1	6757	Metrosideros polymorpha	34	1	0	native	NA	1	9.82	74
Hawai'i Island	6	Zimmerman	1017.88	-154.91	19.444	2003	1	6758	Metrosideros polymorpha	34	1	0	native	NA	1	9.82	48.5
Hawai'i Island	6	Zimmerman	1017.88	-154.91	19.444	2003	1	6767	Metrosideros polymorpha	34	1	0	native	NA	1	9.82	82.7
Hawai'i Island	6	Zimmerman	1017.88	-154.91	19.444	2003	1	6775	Metrosideros polymorpha	34	1	0	native	NA	1	9.82	36
Hawai'i Island	6	Zimmerman	1017.88	-154.91	19.444	2003	1	6785	Metrosideros polymorpha	34	1	0	native	NA	1	9.82	45.2
Hawai'i Island	6	Zimmerman	1017.88	-154.91	19.444	2003	1	6776	Psidium cattleianum	34	1	0	alien	1	1	39.3	12.3
Hawai'i Island	6	Zimmerman	1017.88	-154.91	19.444	2003	1	6820	Psidium guajava	34	1	0	alien	1	1	39.3	10.1
Hawai'i Island	6	Zimmerman	1017.88	-154.91	19.444	2003	1	6762	Psidium guajava	34	1	0	alien	1	1	39.3	10
Hawai'i Island	6	Zimmerman	1017.88	-154.91	19.444	2003	1	6803	Psidium guajava	34	1	0	alien	1	1	39.3	12.6
Hawai'i Island	6	Zimmerman	1017.88	-154.91	19.444	2003	1	6800	Psidium guajava	34	1	0	alien	1	1	39.3	13
Hawai'i Island	6	Zimmerman	1017.88	-154.91	19.444	2003	1	6804	Psidium guajava	34	1	0	alien	1	1	39.3	8.3
Hawai'i Island	6	Zimmerman	1017.88	-154.91	19.444	2003	1	6769	Psidium guajava	34	1	0	alien	1	1	39.3	7.8
Hawai'i Island	6	Zimmerman	1017.88	-154.91	19.444	2003	1	6778	Psidium guajava	34	1	0	alien	1	1	39.3	10.3
Hawai'i Island	6	Zimmerman	1017.88	-154.91	19.444	2003	1	6794	Psidium guajava	34	1	0	alien	1	1	39.3	10.3
Hawai'i Island	6	Zimmerman	1017.88	-154.91	19.444	2003	1	6817	Psidium guajava	34	1	0	alien	1	1	39.3	10.3
Hawai'i Island	6	Zimmerman	1017.88	-154.91	19.444	2003	1	6786	Psidium guajava	34	1	0	alien	1	1	39.3	12.2
Hawai'i Island	6	Zimmerman	1017.88	-154.91	19.444	2003	1	6779	Psidium guajava	34	1	0	alien	1	1	39.3	11
Hawai'i Island	6	Zimmerman	1017.88	-154.91	19.444	2003	1	6771	Psidium guajava	34	1	0	alien	1	1	39.3	11.2
Hawai'i Island	6	Zimmerman	1017.88	-154.91	19.444	2003	1	6840	Psychotria spp.	47	1	0	native	NA	1	39.3	12.8
Hawai'i Island	6	Zimmerman	1017.88	-154.91	19.444	2003	1	6781	Psychotria spp.	47	1	0	native	NA	1	39.3	7.5
Hawai'i Island	6	Zimmerman	1017.88	-154.91	19.444	2003	1	6802	Psychotria spp.	47	1	0	native	NA	1	39.3	12.3
Hawai'i Island	6	Zimmerman	1017.88	-154.91	19.444	2003	1	6766	Psychotria spp.	47	1	0	native	NA	1	39.3	11
Hawai'i Island	6	Zimmerman	1017.88	-154.91	19.444	2003	1	6812	Psychotria spp.	47	1	0	native	NA	1	39.3	5.8
Hawai'i Island	6	Zimmerman	1017.88	-154.91	19.444	2003	1	6828	Psychotria spp.	47	1	0	native	NA	1	39.3	5
Hawai'i Island	6	Zimmerman	1017.88	-154.91	19.444	2003	1	6798	Psychotria spp.	47	1	0	native	NA	1	39.3	6.6
Hawai'i Island	6	Zimmerman	1017.88	-154.91	19.444	2003	1	6811	Psychotria spp.	47	1	0	native	NA	1	39.3	12.2
Hawai'i Island	6	Zimmerman	1017.88	-154.91	19.444	2003	1	6784	Psychotria spp.	47	1	0	native	NA	1	39.3	5.7
Hawai'i Island	6	Zimmerman	1017.88	-154.91	19.444	2003	1	6796	Trema orientalis	12	1	0	alien	0	1	39.3	13.4
Hawai'i Island	7	Zimmerman	1017.88	-154.91	19.444	2003	1	6863	Cibotium glaucum	14	0	0	native	NA	1	39.3	18.5
Hawai'i Island	7	Zimmerman	1017.88	-154.91	19.444	2003	1	6843	Cibotium glaucum	14	0	0	native	NA	1	39.3	29.3
Hawai'i Island	7	Zimmerman	1017.88	-154.91	19.444	2003	1	6968	Cibotium glaucum	14	0	0	native	NA	1	39.3	11.8
Hawai'i Island	7	Zimmerman	1017.88	-154.91	19.444	2003	1	6956	Cibotium glaucum	14	0	0	native	NA	1	39.3	18
Hawai'i Island	7	Zimmerman	1017.88	-154.91	19.444	2003	1	6973	Cibotium glaucum	14	0	0	native	NA	1	39.3	22.5
Hawai'i Island	7	Zimmerman	1017.88	-154.91	19.444	2003	1	6947	Cibotium glaucum	14	0	0	native	NA	1	39.3	11
Hawai'i Island	7	Zimmerman	1017.88	-154.91	19.444	2003	1	6875	Cibotium menziesii	14	0	0	native	NA	1	39.3	22
Hawai'i Island	7	Zimmerman	1017.88	-154.91	19.444	2003	1	6873	Cibotium menziesii	14	0	0	native	NA	1	39.3	13.5
Hawai'i Island	7	Zimmerman	1017.88	-154.91	19.444	2003	1	6888	Cibotium menziesii	14	0	0	native	NA	1	39.3	16
Hawai'i Island	7	Zimmerman	1017.88	-154.91	19.444	2003	1	6867	Cibotium menziesii	14	0	0	native	NA	1	39.3	13
Hawai'i Island	7	Zimmerman	1017.88	-154.91	19.444	2003	1	6849	Cibotium menziesii	14	0	0	native	NA	1	39.3	13.4
Hawai'i Island	7	Zimmerman	1017.88	-154.91	19.444	2003	1	6894	Cibotium menziesii	14	0	0	native	NA	1	39.3	20.5
Hawai'i Island	7	Zimmerman	1017.88	-154.91	19.444	2003	1	6883	Cibotium menziesii	14	0	0	native	NA	1	39.3	11.6
Hawai'i Island	7	Zimmerman	1017.88	-154.91	19.444	2003	1	6887	Cibotium menziesii	14	0	0	native	NA	1	39.3	20.4
Hawai'i Island	7	Zimmerman	1017.88	-154.91	19.444	2003	1	6895	Cibotium menziesii	14	0	0	native	NA	1	9.82	31.9
Hawai'i Island	7	Zimmerman	1017.88	-154.91	19.444	2003	1	6886	Cibotium menziesii	14	0	0	native	NA	1	39.3	18
Hawai'i Island	7	Zimmerman	1017.88	-154.91	19.444	2003	1	6848	Cibotium menziesii	14	0	0	native	NA	1	39.3	13
Hawai'i Island	7	Zimmerman	1017.88	-154.91	19.444	2003	1	6900	Cibotium menziesii	14	0	0	native	NA	1	39.3	20.7
Hawai'i Island	7	Zimmerman	1017.88	-154.91	19.444	2003	1	6980	Cibotium menziesii	14	0	0	native	NA	1	39.3	22.1
Hawai'i Island	7	Zimmerman	1017.88	-154.91	19.444	2003	1	6862	Cibotium menziesii	14	0	0	native	NA	1	39.3	14
Hawai'i Island	7	Zimmerman	1017.88	-154.91	19.444	2003	1	6871	Cibotium menziesii	14	0	0	native	NA	1	39.3	21.6
Hawai'i Island	7	Zimmerman	1017.88	-154.91	19.444	2003	1	6899	Cibotium menziesii	14	0	0	native	NA	1	39.3	12.4
Hawai'i Island	7	Zimmerman	1017.88	-154.91	19.444	2003	1	6859	Cibotium menziesii	14	0	0	native	NA	1	39.3	17
Hawai'i Island	7	Zimmerman	1017.88	-154.91	19.444	2003	1	6963	Cibotium menziesii	14	0	0	native	NA	1	39.3	14.9
Hawai'i Island	7	Zimmerman	1017.88	-154.91	19.444	2003	1	6978	Cibotium menziesii	14	0	0	native	NA	1	39.3	16.7
Hawai'i Island	7	Zimmerman	1017.88	-154.91	19.444	2003	1	6844	Cibotium menziesii	14	0	0	native	NA	1	39.3	15.7
Hawai'i Island	7	Zimmerman	1017.88	-154.91	19.444	2003	1	6961	Cibotium menziesii	14	0	0	native	NA	1	39.3	13.8
Hawai'i Island	7	Zimmerman	1017.88	-154.91	19.444	2003	1	6928	Cibotium menziesii	14	0	0	native	NA	1	39.3	11.2
Hawai'i Island	7	Zimmerman	1017.88	-154.91	19.444	2003	1	6948	Cibotium menziesii	14	0	0	native	NA	1	39.3	19.6
Hawai'i Island	7	Zimmerman	1017.88	-154.91	19.444	2003	1	6954	Cibotium menziesii	14	0	0	native	NA	1	39.3	16
Hawai'i Island	7	Zimmerman	1017.88	-154.91	19.444	2003	1	7001	Cibotium menziesii	14	0	0	native	NA	1	39.3	10
Hawai'i Island	7	Zimmerman	1017.88	-154.91	19.444	2003	1	6917	Cibotium menziesii	14	0	0	native	NA	1	39.3	7.9
Hawai'i Island	7	Zimmerman	1017.88	-154.91	19.444	2003	1	6942	Cibotium menziesii	14	0	0	native	NA	1	39.3	16.8
Hawai'i Island	7	Zimmerman	1017.88	-154.91	19.444	2003	1	6914	Cibotium menziesii	14	0	0	native	NA	1	39.3	20.7
Hawai'i Island	7	Zimmerman	1017.88	-154.91	19.444	2003	1	6951	Cibotium menziesii	14	0	0	native	NA	1	39.3	12.4
Hawai'i Island	7	Zimmerman	1017.88	-154.91	19.444	2003	1	7017	Cibotium menziesii	14	0	0	native	NA	1	39.3	19.4
Hawai'i Island	7	Zimmerman	1017.88	-154.91	19.444	2003	1	6949	Cibotium menziesii	14	0	0	native	NA	1	39.3	10.5
Hawai'i Island	7	Zimmerman	1017.88	-154.91	19.444	2003	1	6939	Cibotium menziesii	14	0	0	native	NA	1	39.3	9
Hawai'i Island	7	Zimmerman	1017.88	-154.91	19.444	2003	1	7000	Cibotium spp.	14	0	0	native	NA	1	39.3	17.5
Hawai'i Island	7	Zimmerman	1017.88	-154.91	19.444	2003	1	7023	Cibotium spp.	14	0	0	native	NA	1	9.82	42.3
Hawai'i Island	7	Zimmerman	1017.88	-154.91	19.444	2003	1	6847	Melastoma malabathricum	30	1	0	alien	1	1	39.3	6.2
Hawai'i Island	7	Zimmerman	1017.88	-154.91	19.444	2003	1	7018	Melastoma malabathricum	30	1	0	alien	1	1	39.3	5.5
Hawai'i Island	7	Zimmerman	1017.88	-154.91	19.444	2003	1	7010	Melastoma malabathricum	30	1	0	alien	1	1	39.3	9.6
Hawai'i Island	7	Zimmerman	1017.88	-154.91	19.444	2003	1	6845	Melastoma malabathricum	30	1	0	alien	1	1	39.3	5.1
Hawai'i Island	7	Zimmerman	1017.88	-154.91	19.444	2003	1	7020	Melastoma malabathricum	30	1	0	alien	1	1	39.3	8.9
Hawai'i Island	7	Zimmerman	1017.88	-154.91	19.444	2003	1	6986	Melastoma malabathricum	30	1	0	alien	1	1	39.3	9.3
Hawai'i Island	7	Zimmerman	1017.88	-154.91	19.444	2003	1	7009	Melastoma malabathricum	30	1	0	alien	1	1	39.3	8.3
Hawai'i Island	7	Zimmerman	1017.88	-154.91	19.444	2003	1	6911	Melastoma malabathricum	30	1	0	alien	1	1	39.3	6.1
Hawai'i Island	7	Zimmerman	1017.88	-154.91	19.444	2003	1	6935	Melastoma malabathricum	30	1	0	alien	1	1	39.3	5.6
Hawai'i Island	7	Zimmerman	1017.88	-154.91	19.444	2003	1	6984	Melastoma malabathricum	30	1	0	alien	1	1	39.3	7.4
Hawai'i Island	7	Zimmerman	1017.88	-154.91	19.444	2003	1	6992	Melastoma malabathricum	30	1	0	alien	1	1	39.3	9.2
Hawai'i Island	7	Zimmerman	1017.88	-154.91	19.444	2003	1	7008	Melastoma malabathricum	30	1	0	alien	1	1	39.3	7.1
Hawai'i Island	7	Zimmerman	1017.88	-154.91	19.444	2003	1	6913	Melastoma malabathricum	30	1	0	alien	1	1	39.3	6.2
Hawai'i Island	7	Zimmerman	1017.88	-154.91	19.444	2003	1	6938	Melastoma malabathricum	30	1	0	alien	1	1	39.3	8.3
Hawai'i Island	7	Zimmerman	1017.88	-154.91	19.444	2003	1	6977	Melastoma malabathricum	30	1	0	alien	1	1	39.3	8.6
Hawai'i Island	7	Zimmerman	1017.88	-154.91	19.444	2003	1	6907	Melastoma malabathricum	30	1	0	alien	1	1	39.3	7.7
Hawai'i Island	7	Zimmerman	1017.88	-154.91	19.444	2003	1	6920	Melastoma malabathricum	30	1	0	alien	1	1	39.3	5.3
Hawai'i Island	7	Zimmerman	1017.88	-154.91	19.444	2003	1	6971	Melastoma malabathricum	30	1	0	alien	1	1	39.3	5.3
Hawai'i Island	7	Zimmerman	1017.88	-154.91	19.444	2003	1	6860	Melastoma malabathricum	30	1	0	alien	1	1	39.3	6.5
Hawai'i Island	7	Zimmerman	1017.88	-154.91	19.444	2003	1	6933	Melastoma malabathricum	30	1	0	alien	1	1	39.3	5.8
Hawai'i Island	7	Zimmerman	1017.88	-154.91	19.444	2003	1	7004	Melastoma malabathricum	30	1	0	alien	1	1	39.3	6
Hawai'i Island	7	Zimmerman	1017.88	-154.91	19.444	2003	1	6999	Melastoma malabathricum	30	1	0	alien	1	1	39.3	6.1
Hawai'i Island	7	Zimmerman	1017.88	-154.91	19.444	2003	1	6854	Melastoma malabathricum	30	1	0	alien	1	1	39.3	9
Hawai'i Island	7	Zimmerman	1017.88	-154.91	19.444	2003	1	6959	Melastoma malabathricum	30	1	0	alien	1	1	39.3	5.2
Hawai'i Island	7	Zimmerman	1017.88	-154.91	19.444	2003	1	6905	Metrosideros polymorpha	34	1	0	native	NA	1	39.3	23.2
Hawai'i Island	7	Zimmerman	1017.88	-154.91	19.444	2003	1	6877	Metrosideros polymorpha	34	1	0	native	NA	1	9.82	37.1
Hawai'i Island	7	Zimmerman	1017.88	-154.91	19.444	2003	1	6890	Metrosideros polymorpha	34	1	0	native	NA	1	9.82	34.4
Hawai'i Island	7	Zimmerman	1017.88	-154.91	19.444	2003	1	6922	Metrosideros polymorpha	34	1	0	native	NA	1	9.82	31.1
Hawai'i Island	7	Zimmerman	1017.88	-154.91	19.444	2003	1	6924	Metrosideros polymorpha	34	1	0	native	NA	1	9.82	37.1
Hawai'i Island	7	Zimmerman	1017.88	-154.91	19.444	2003	1	6953	Metrosideros polymorpha	34	1	0	native	NA	1	9.82	45.9
Hawai'i Island	7	Zimmerman	1017.88	-154.91	19.444	2003	1	6967	Metrosideros polymorpha	34	1	0	native	NA	1	39.3	24.4
Hawai'i Island	7	Zimmerman	1017.88	-154.91	19.444	2003	1	6979	Metrosideros polymorpha	34	1	0	native	NA	1	9.82	33.8
Hawai'i Island	7	Zimmerman	1017.88	-154.91	19.444	2003	1	6981	Metrosideros polymorpha	34	1	0	native	NA	1	9.82	67.5
Hawai'i Island	7	Zimmerman	1017.88	-154.91	19.444	2003	1	6990	Metrosideros polymorpha	34	1	0	native	NA	1	9.82	70.8
Hawai'i Island	7	Zimmerman	1017.88	-154.91	19.444	2003	1	6996	Metrosideros polymorpha	34	1	0	native	NA	1	9.82	34.5
Hawai'i Island	7	Zimmerman	1017.88	-154.91	19.444	2003	1	7011	Metrosideros polymorpha	34	1	0	native	NA	1	9.82	32.5
Hawai'i Island	7	Zimmerman	1017.88	-154.91	19.444	2003	1	7002	Psidium cattleianum	34	1	0	alien	1	1	39.3	13.1
Hawai'i Island	7	Zimmerman	1017.88	-154.91	19.444	2003	1	7025	Psidium cattleianum	34	1	0	alien	1	1	39.3	10.2
Hawai'i Island	7	Zimmerman	1017.88	-154.91	19.444	2003	1	6995	Psidium cattleianum	34	1	0	alien	1	1	39.3	5.4
Hawai'i Island	7	Zimmerman	1017.88	-154.91	19.444	2003	1	7013	Psidium cattleianum	34	1	0	alien	1	1	39.3	6.1
Hawai'i Island	7	Zimmerman	1017.88	-154.91	19.444	2003	1	7019	Psidium cattleianum	34	1	0	alien	1	1	39.3	9
Hawai'i Island	7	Zimmerman	1017.88	-154.91	19.444	2003	1	6885	Psidium cattleianum	34	1	0	alien	1	1	39.3	10
Hawai'i Island	7	Zimmerman	1017.88	-154.91	19.444	2003	1	7015	Psidium cattleianum	34	1	0	alien	1	1	39.3	6.1
Hawai'i Island	7	Zimmerman	1017.88	-154.91	19.444	2003	1	7012	Psidium cattleianum	34	1	0	alien	1	1	39.3	6.9
Hawai'i Island	7	Zimmerman	1017.88	-154.91	19.444	2003	1	6861	Psidium cattleianum	34	1	0	alien	1	1	39.3	9
Hawai'i Island	7	Zimmerman	1017.88	-154.91	19.444	2003	1	6966	Psidium cattleianum	34	1	0	alien	1	1	39.3	11
Hawai'i Island	7	Zimmerman	1017.88	-154.91	19.444	2003	1	6985	Psidium cattleianum	34	1	0	alien	1	1	39.3	9.5
Hawai'i Island	7	Zimmerman	1017.88	-154.91	19.444	2003	1	6852	Psidium cattleianum	34	1	0	alien	1	1	39.3	7.4
Hawai'i Island	7	Zimmerman	1017.88	-154.91	19.444	2003	1	6994	Psidium cattleianum	34	1	0	alien	1	1	39.3	7.7
Hawai'i Island	7	Zimmerman	1017.88	-154.91	19.444	2003	1	6952	Psidium cattleianum	34	1	0	alien	1	1	39.3	7.4
Hawai'i Island	7	Zimmerman	1017.88	-154.91	19.444	2003	1	6997	Psidium cattleianum	34	1	0	alien	1	1	39.3	6.1
Hawai'i Island	7	Zimmerman	1017.88	-154.91	19.444	2003	1	6944	Psidium cattleianum	34	1	0	alien	1	1	39.3	7.8
Hawai'i Island	7	Zimmerman	1017.88	-154.91	19.444	2003	1	6972	Psidium cattleianum	34	1	0	alien	1	1	39.3	5.6
Hawai'i Island	7	Zimmerman	1017.88	-154.91	19.444	2003	1	6937	Psidium cattleianum	34	1	0	alien	1	1	39.3	7.3
Hawai'i Island	7	Zimmerman	1017.88	-154.91	19.444	2003	1	6974	Psidium cattleianum	34	1	0	alien	1	1	39.3	6.7
Hawai'i Island	7	Zimmerman	1017.88	-154.91	19.444	2003	1	6897	Psidium cattleianum	34	1	0	alien	1	1	39.3	11.7
Hawai'i Island	7	Zimmerman	1017.88	-154.91	19.444	2003	1	6932	Psidium cattleianum	34	1	0	alien	1	1	39.3	13
Hawai'i Island	7	Zimmerman	1017.88	-154.91	19.444	2003	1	6925	Psidium cattleianum	34	1	0	alien	1	1	39.3	6.3
Hawai'i Island	7	Zimmerman	1017.88	-154.91	19.444	2003	1	6921	Psidium cattleianum	34	1	0	alien	1	1	39.3	5
Hawai'i Island	7	Zimmerman	1017.88	-154.91	19.444	2003	1	6898	Psidium cattleianum	34	1	0	alien	1	1	39.3	5.1
Hawai'i Island	7	Zimmerman	1017.88	-154.91	19.444	2003	1	6923	Psidium cattleianum	34	1	0	alien	1	1	39.3	9.7
Hawai'i Island	7	Zimmerman	1017.88	-154.91	19.444	2003	1	6912	Psidium cattleianum	34	1	0	alien	1	1	39.3	10.7
Hawai'i Island	7	Zimmerman	1017.88	-154.91	19.444	2003	1	6896	Psidium guajava	34	1	0	alien	1	1	39.3	6
Hawai'i Island	7	Zimmerman	1017.88	-154.91	19.444	2003	1	6930	Psychotria spp.	47	1	0	native	NA	1	39.3	7
Hawai'i Island	7	Zimmerman	1017.88	-154.91	19.444	2003	1	7014	Psychotria spp.	47	1	0	native	NA	1	39.3	6.3
Hawai'i Island	7	Zimmerman	1017.88	-154.91	19.444	2003	1	6908	Psychotria spp.	47	1	0	native	NA	1	39.3	6.2
Hawai'i Island	7	Zimmerman	1017.88	-154.91	19.444	2003	1	6882	Psychotria spp.	47	1	0	native	NA	1	39.3	7.4
Hawai'i Island	7	Zimmerman	1017.88	-154.91	19.444	2003	1	6876	Psychotria spp.	47	1	0	native	NA	1	39.3	6.2
Hawai'i Island	7	Zimmerman	1017.88	-154.91	19.444	2003	1	6991	Psychotria spp.	47	1	0	native	NA	1	39.3	7.5
Hawai'i Island	7	Zimmerman	1017.88	-154.91	19.444	2003	1	6855	Psychotria spp.	47	1	0	native	NA	1	39.3	6.8
Hawai'i Island	7	Zimmerman	1017.88	-154.91	19.444	2003	1	6864	Psychotria spp.	47	1	0	native	NA	1	39.3	5
Hawai'i Island	7	Zimmerman	1017.88	-154.91	19.444	2003	1	6872	Psychotria spp.	47	1	0	native	NA	1	39.3	7.1
Hawai'i Island	7	Zimmerman	1017.88	-154.91	19.444	2003	1	6950	Psychotria spp.	47	1	0	native	NA	1	39.3	7.3
Hawai'i Island	7	Zimmerman	1017.88	-154.91	19.444	2003	1	6851	Polyscias hawaiensis	6	1	0	native	NA	1	39.3	11.8
Hawai'i Island	8	Zimmerman	1017.88	-154.91	19.444	2003	1	7180	Cibotium glaucum	14	0	0	native	NA	1	39.3	6.6
Hawai'i Island	8	Zimmerman	1017.88	-154.91	19.444	2003	1	7169	Cibotium glaucum	14	0	0	native	NA	1	39.3	12.7
Hawai'i Island	8	Zimmerman	1017.88	-154.91	19.444	2003	1	7064	Cibotium glaucum	14	0	0	native	NA	1	39.3	11.2
Hawai'i Island	8	Zimmerman	1017.88	-154.91	19.444	2003	1	7167	Cibotium glaucum	14	0	0	native	NA	1	39.3	19
Hawai'i Island	8	Zimmerman	1017.88	-154.91	19.444	2003	1	7141	Cibotium glaucum	14	0	0	native	NA	1	39.3	19.3
Hawai'i Island	8	Zimmerman	1017.88	-154.91	19.444	2003	1	7166	Cibotium glaucum	14	0	0	native	NA	1	39.3	16.6
Hawai'i Island	8	Zimmerman	1017.88	-154.91	19.444	2003	1	7090	Cibotium glaucum	14	0	0	native	NA	1	39.3	16
Hawai'i Island	8	Zimmerman	1017.88	-154.91	19.444	2003	1	7105	Cibotium glaucum	14	0	0	native	NA	1	39.3	19.3
Hawai'i Island	8	Zimmerman	1017.88	-154.91	19.444	2003	1	7080	Cibotium glaucum	14	0	0	native	NA	1	39.3	18
Hawai'i Island	8	Zimmerman	1017.88	-154.91	19.444	2003	1	7078	Cibotium glaucum	14	0	0	native	NA	1	39.3	12.5
Hawai'i Island	8	Zimmerman	1017.88	-154.91	19.444	2003	1	7112	Cibotium glaucum	14	0	0	native	NA	1	39.3	19.7
Hawai'i Island	8	Zimmerman	1017.88	-154.91	19.444	2003	1	7155	Cibotium glaucum	14	0	0	native	NA	1	39.3	15.3
Hawai'i Island	8	Zimmerman	1017.88	-154.91	19.444	2003	1	7104	Cibotium glaucum	14	0	0	native	NA	1	39.3	12.5
Hawai'i Island	8	Zimmerman	1017.88	-154.91	19.444	2003	1	7134	Cibotium menziesii	14	0	0	native	NA	1	39.3	13.3
Hawai'i Island	8	Zimmerman	1017.88	-154.91	19.444	2003	1	7202	Cibotium menziesii	14	0	0	native	NA	1	39.3	10.8
Hawai'i Island	8	Zimmerman	1017.88	-154.91	19.444	2003	1	7143	Cibotium menziesii	14	0	0	native	NA	1	39.3	12
Hawai'i Island	8	Zimmerman	1017.88	-154.91	19.444	2003	1	7071	Cibotium menziesii	14	0	0	native	NA	1	39.3	10
Hawai'i Island	8	Zimmerman	1017.88	-154.91	19.444	2003	1	7172	Cibotium menziesii	14	0	0	native	NA	1	39.3	15.7
Hawai'i Island	8	Zimmerman	1017.88	-154.91	19.444	2003	1	7109	Cibotium menziesii	14	0	0	native	NA	1	39.3	11.8
Hawai'i Island	8	Zimmerman	1017.88	-154.91	19.444	2003	1	7040	Cibotium menziesii	14	0	0	native	NA	1	39.3	12.3
Hawai'i Island	8	Zimmerman	1017.88	-154.91	19.444	2003	1	7174	Cibotium menziesii	14	0	0	native	NA	1	39.3	10
Hawai'i Island	8	Zimmerman	1017.88	-154.91	19.444	2003	1	7095	Cibotium menziesii	14	0	0	native	NA	1	39.3	20.9
Hawai'i Island	8	Zimmerman	1017.88	-154.91	19.444	2003	1	7099	Cibotium menziesii	14	0	0	native	NA	1	39.3	19.3
Hawai'i Island	8	Zimmerman	1017.88	-154.91	19.444	2003	1	7146	Cibotium menziesii	14	0	0	native	NA	1	39.3	15
Hawai'i Island	8	Zimmerman	1017.88	-154.91	19.444	2003	1	7096	Cibotium menziesii	14	0	0	native	NA	1	39.3	11
Hawai'i Island	8	Zimmerman	1017.88	-154.91	19.444	2003	1	7034	Cibotium menziesii	14	0	0	native	NA	1	39.3	12.5
Hawai'i Island	8	Zimmerman	1017.88	-154.91	19.444	2003	1	7205	Diospyros sandwicensis	21	1	0	native	NA	1	39.3	9.5
Hawai'i Island	8	Zimmerman	1017.88	-154.91	19.444	2003	1	7098	Freycinetia arborea	37	1	1	native	NA	1	39.3	11.8
Hawai'i Island	8	Zimmerman	1017.88	-154.91	19.444	2003	1	7170	Melastoma malabathricum	30	1	0	alien	1	1	39.3	5
Hawai'i Island	8	Zimmerman	1017.88	-154.91	19.444	2003	1	7125	Metrosideros polymorpha	34	1	0	native	NA	1	9.82	49.2
Hawai'i Island	8	Zimmerman	1017.88	-154.91	19.444	2003	1	7154	Metrosideros polymorpha	34	1	0	native	NA	1	39.3	19
Hawai'i Island	8	Zimmerman	1017.88	-154.91	19.444	2003	1	7156	Metrosideros polymorpha	34	1	0	native	NA	1	9.82	43.6
Hawai'i Island	8	Zimmerman	1017.88	-154.91	19.444	2003	1	7158	Metrosideros polymorpha	34	1	0	native	NA	1	39.3	25.9
Hawai'i Island	8	Zimmerman	1017.88	-154.91	19.444	2003	1	7199	Metrosideros polymorpha	34	1	0	native	NA	1	9.82	61.4
Hawai'i Island	8	Zimmerman	1017.88	-154.91	19.444	2003	1	7201	Metrosideros polymorpha	34	1	0	native	NA	1	9.82	47.5
Hawai'i Island	8	Zimmerman	1017.88	-154.91	19.444	2003	1	7213	Metrosideros polymorpha	34	1	0	native	NA	1	39.3	25.1
Hawai'i Island	8	Zimmerman	1017.88	-154.91	19.444	2003	1	7224	Metrosideros polymorpha	34	1	0	native	NA	1	9.82	33.7
Hawai'i Island	8	Zimmerman	1017.88	-154.91	19.444	2003	1	7226	Metrosideros polymorpha	34	1	0	native	NA	1	9.82	36.3
Hawai'i Island	8	Zimmerman	1017.88	-154.91	19.444	2003	1	7227	Metrosideros polymorpha	34	1	0	native	NA	1	9.82	57.6
Hawai'i Island	8	Zimmerman	1017.88	-154.91	19.444	2003	1	7042	Metrosideros polymorpha	34	1	0	native	NA	1	39.3	27
Hawai'i Island	8	Zimmerman	1017.88	-154.91	19.444	2003	1	7047	Metrosideros polymorpha	34	1	0	native	NA	1	9.82	34.5
Hawai'i Island	8	Zimmerman	1017.88	-154.91	19.444	2003	1	7053	Metrosideros polymorpha	34	1	0	native	NA	1	39.3	9.8
Hawai'i Island	8	Zimmerman	1017.88	-154.91	19.444	2003	1	7066	Metrosideros polymorpha	34	1	0	native	NA	1	39.3	15.1
Hawai'i Island	8	Zimmerman	1017.88	-154.91	19.444	2003	1	7074	Metrosideros polymorpha	34	1	0	native	NA	1	39.3	7
Hawai'i Island	8	Zimmerman	1017.88	-154.91	19.444	2003	1	7076	Metrosideros polymorpha	34	1	0	native	NA	1	39.3	15.3
Hawai'i Island	8	Zimmerman	1017.88	-154.91	19.444	2003	1	7077	Metrosideros polymorpha	34	1	0	native	NA	1	39.3	29
Hawai'i Island	8	Zimmerman	1017.88	-154.91	19.444	2003	1	7083	Metrosideros polymorpha	34	1	0	native	NA	1	9.82	55.1
Hawai'i Island	8	Zimmerman	1017.88	-154.91	19.444	2003	1	7084	Metrosideros polymorpha	34	1	0	native	NA	1	39.3	13
Hawai'i Island	8	Zimmerman	1017.88	-154.91	19.444	2003	1	7087	Metrosideros polymorpha	34	1	0	native	NA	1	39.3	9.7
Hawai'i Island	8	Zimmerman	1017.88	-154.91	19.444	2003	1	7091	Metrosideros polymorpha	34	1	0	native	NA	1	39.3	24.8
Hawai'i Island	8	Zimmerman	1017.88	-154.91	19.444	2003	1	7093	Metrosideros polymorpha	34	1	0	native	NA	1	39.3	6
Hawai'i Island	8	Zimmerman	1017.88	-154.91	19.444	2003	1	7188	Metrosideros polymorpha	34	1	0	native	NA	1	9.82	62
Hawai'i Island	8	Zimmerman	1017.88	-154.91	19.444	2003	1	7203	Metrosideros polymorpha	34	1	0	native	NA	1	39.3	18.6
Hawai'i Island	8	Zimmerman	1017.88	-154.91	19.444	2003	1	7216	Metrosideros polymorpha	34	1	0	native	NA	1	9.82	45.6
Hawai'i Island	8	Zimmerman	1017.88	-154.91	19.444	2003	1	7223	Metrosideros polymorpha	34	1	0	native	NA	1	39.3	6.5
Hawai'i Island	8	Zimmerman	1017.88	-154.91	19.444	2003	1	7228	Metrosideros polymorpha	34	1	0	native	NA	1	9.82	47
Hawai'i Island	8	Zimmerman	1017.88	-154.91	19.444	2003	1	7045	Psidium cattleianum	34	1	0	alien	1	1	39.3	9.8
Hawai'i Island	8	Zimmerman	1017.88	-154.91	19.444	2003	1	7041	Psidium cattleianum	34	1	0	alien	1	1	39.3	7.3
Hawai'i Island	8	Zimmerman	1017.88	-154.91	19.444	2003	1	7035	Psidium cattleianum	34	1	0	alien	1	1	39.3	9.9
Hawai'i Island	8	Zimmerman	1017.88	-154.91	19.444	2003	1	7027	Psidium cattleianum	34	1	0	alien	1	1	39.3	9.2
Hawai'i Island	8	Zimmerman	1017.88	-154.91	19.444	2003	1	7037	Psidium cattleianum	34	1	0	alien	1	1	39.3	8
Hawai'i Island	8	Zimmerman	1017.88	-154.91	19.444	2003	1	7028	Psidium cattleianum	34	1	0	alien	1	1	39.3	10.6
Hawai'i Island	8	Zimmerman	1017.88	-154.91	19.444	2003	1	7207	Psidium cattleianum	34	1	0	alien	1	1	39.3	9
Hawai'i Island	8	Zimmerman	1017.88	-154.91	19.444	2003	1	7222	Psidium cattleianum	34	1	0	alien	1	1	39.3	7.6
Hawai'i Island	8	Zimmerman	1017.88	-154.91	19.444	2003	1	7127	Psidium cattleianum	34	1	0	alien	1	1	39.3	5.7
Hawai'i Island	8	Zimmerman	1017.88	-154.91	19.444	2003	1	7212	Psidium cattleianum	34	1	0	alien	1	1	39.3	6.4
Hawai'i Island	8	Zimmerman	1017.88	-154.91	19.444	2003	1	7217	Psidium cattleianum	34	1	0	alien	1	1	39.3	13.3
Hawai'i Island	8	Zimmerman	1017.88	-154.91	19.444	2003	1	7148	Psidium cattleianum	34	1	0	alien	1	1	39.3	8.8
Hawai'i Island	8	Zimmerman	1017.88	-154.91	19.444	2003	1	7195	Psidium cattleianum	34	1	0	alien	1	1	39.3	9
Hawai'i Island	8	Zimmerman	1017.88	-154.91	19.444	2003	1	7057	Psidium cattleianum	34	1	0	alien	1	1	39.3	7.5
Hawai'i Island	8	Zimmerman	1017.88	-154.91	19.444	2003	1	7182	Psidium cattleianum	34	1	0	alien	1	1	39.3	6.3
Hawai'i Island	8	Zimmerman	1017.88	-154.91	19.444	2003	1	7187	Psidium cattleianum	34	1	0	alien	1	1	39.3	7.4
Hawai'i Island	8	Zimmerman	1017.88	-154.91	19.444	2003	1	7142	Psidium cattleianum	34	1	0	alien	1	1	39.3	5.2
Hawai'i Island	8	Zimmerman	1017.88	-154.91	19.444	2003	1	7164	Psidium cattleianum	34	1	0	alien	1	1	39.3	9.2
Hawai'i Island	8	Zimmerman	1017.88	-154.91	19.444	2003	1	7186	Psidium cattleianum	34	1	0	alien	1	1	39.3	5.9
Hawai'i Island	8	Zimmerman	1017.88	-154.91	19.444	2003	1	7123	Psidium cattleianum	34	1	0	alien	1	1	39.3	7.1
Hawai'i Island	8	Zimmerman	1017.88	-154.91	19.444	2003	1	7132	Psidium cattleianum	34	1	0	alien	1	1	39.3	9.7
Hawai'i Island	8	Zimmerman	1017.88	-154.91	19.444	2003	1	7147	Psidium cattleianum	34	1	0	alien	1	1	39.3	6.1
Hawai'i Island	8	Zimmerman	1017.88	-154.91	19.444	2003	1	7163	Psidium cattleianum	34	1	0	alien	1	1	39.3	8.5
Hawai'i Island	8	Zimmerman	1017.88	-154.91	19.444	2003	1	7173	Psidium cattleianum	34	1	0	alien	1	1	39.3	6.5
Hawai'i Island	8	Zimmerman	1017.88	-154.91	19.444	2003	1	7065	Psidium cattleianum	34	1	0	alien	1	1	39.3	6.4
Hawai'i Island	8	Zimmerman	1017.88	-154.91	19.444	2003	1	7081	Psidium cattleianum	34	1	0	alien	1	1	39.3	7.7
Hawai'i Island	8	Zimmerman	1017.88	-154.91	19.444	2003	1	7176	Psidium cattleianum	34	1	0	alien	1	1	39.3	9.3
Hawai'i Island	8	Zimmerman	1017.88	-154.91	19.444	2003	1	7067	Psidium cattleianum	34	1	0	alien	1	1	39.3	6.7
Hawai'i Island	8	Zimmerman	1017.88	-154.91	19.444	2003	1	7073	Psidium cattleianum	34	1	0	alien	1	1	39.3	6.2
Hawai'i Island	8	Zimmerman	1017.88	-154.91	19.444	2003	1	7144	Psidium cattleianum	34	1	0	alien	1	1	39.3	5.6
Hawai'i Island	8	Zimmerman	1017.88	-154.91	19.444	2003	1	7153	Psidium cattleianum	34	1	0	alien	1	1	39.3	5.5
Hawai'i Island	8	Zimmerman	1017.88	-154.91	19.444	2003	1	7145	Psidium cattleianum	34	1	0	alien	1	1	39.3	5
Hawai'i Island	8	Zimmerman	1017.88	-154.91	19.444	2003	1	7136	Psidium cattleianum	34	1	0	alien	1	1	39.3	6.2
Hawai'i Island	8	Zimmerman	1017.88	-154.91	19.444	2003	1	7138	Psidium cattleianum	34	1	0	alien	1	1	39.3	7.1
Hawai'i Island	8	Zimmerman	1017.88	-154.91	19.444	2003	1	7161	Psidium cattleianum	34	1	0	alien	1	1	39.3	10.5
Hawai'i Island	8	Zimmerman	1017.88	-154.91	19.444	2003	1	7086	Psidium cattleianum	34	1	0	alien	1	1	39.3	5
Hawai'i Island	8	Zimmerman	1017.88	-154.91	19.444	2003	1	7106	Psidium cattleianum	34	1	0	alien	1	1	39.3	5.3
Hawai'i Island	8	Zimmerman	1017.88	-154.91	19.444	2003	1	7092	Psidium cattleianum	34	1	0	alien	1	1	39.3	9.6
Hawai'i Island	8	Zimmerman	1017.88	-154.91	19.444	2003	1	7119	Psidium cattleianum	34	1	0	alien	1	1	39.3	7.5
Hawai'i Island	8	Zimmerman	1017.88	-154.91	19.444	2003	1	7114	Psidium cattleianum	34	1	0	alien	1	1	39.3	7.3
Hawai'i Island	8	Zimmerman	1017.88	-154.91	19.444	2003	1	7108	Psidium cattleianum	34	1	0	alien	1	1	39.3	7.6
Hawai'i Island	8	Zimmerman	1017.88	-154.91	19.444	2003	1	7107	Psidium cattleianum	34	1	0	alien	1	1	39.3	6.1
Hawai'i Island	8	Zimmerman	1017.88	-154.91	19.444	2003	1	7088	Psidium cattleianum	34	1	0	alien	1	1	39.3	6.8
Hawai'i Island	8	Zimmerman	1017.88	-154.91	19.444	2003	1	7039	Psidium guajava	34	1	0	alien	1	1	39.3	7.5
Hawai'i Island	8	Zimmerman	1017.88	-154.91	19.444	2003	1	7189	Psidium guajava	34	1	0	alien	1	1	39.3	6.7
Hawai'i Island	8	Zimmerman	1017.88	-154.91	19.444	2003	1	7044	Psychotria spp.	47	1	0	native	NA	1	39.3	6.7
Hawai'i Island	8	Zimmerman	1017.88	-154.91	19.444	2003	1	7151	Psychotria spp.	47	1	0	native	NA	1	39.3	5
Hawai'i Island	8	Zimmerman	1017.88	-154.91	19.444	2003	1	7049	Psychotria spp.	47	1	0	native	NA	1	39.3	8.7
Hawai'i Island	8	Zimmerman	1017.88	-154.91	19.444	2003	1	7140	Psychotria spp.	47	1	0	native	NA	1	39.3	6
Hawai'i Island	8	Zimmerman	1017.88	-154.91	19.444	2003	1	7124	Psychotria spp.	47	1	0	native	NA	1	39.3	5.7
Hawai'i Island	8	Zimmerman	1017.88	-154.91	19.444	2003	1	7116	Psychotria spp.	47	1	0	native	NA	1	39.3	7.6
Hawai'i Island	8	Zimmerman	1017.88	-154.91	19.444	2003	1	7082	Psychotria spp.	47	1	0	native	NA	1	39.3	8.6
Hawai'i Island	8	Zimmerman	1017.88	-154.91	19.444	2003	1	7054	Psychotria spp.	47	1	0	native	NA	1	39.3	5.7
Hawai'i Island	8	Zimmerman	1017.88	-154.91	19.444	2003	1	7051	Psychotria spp.	47	1	0	native	NA	1	39.3	5.9
Hawai'i Island	8	Zimmerman	1017.88	-154.91	19.444	2003	1	7150	Psychotria spp.	47	1	0	native	NA	1	39.3	5.1
Hawai'i Island	8	Zimmerman	1017.88	-154.91	19.444	2003	1	7135	Psychotria spp.	47	1	0	native	NA	1	39.3	5.1
Hawai'i Island	8	Zimmerman	1017.88	-154.91	19.444	2003	1	7062	Psychotria spp.	47	1	0	native	NA	1	39.3	13.8
Hawai'i Island	9	Zimmerman	1017.88	-154.91	19.444	2003	1	7251	Melastoma malabathricum	30	1	0	alien	1	1	39.3	5
Hawai'i Island	9	Zimmerman	1017.88	-154.91	19.444	2003	1	7232	Melastoma malabathricum	30	1	0	alien	1	1	39.3	6.6
Hawai'i Island	9	Zimmerman	1017.88	-154.91	19.444	2003	1	7249	Melastoma malabathricum	30	1	0	alien	1	1	39.3	5
Hawai'i Island	9	Zimmerman	1017.88	-154.91	19.444	2003	1	7261	Melastoma malabathricum	30	1	0	alien	1	1	39.3	5.8
Hawai'i Island	9	Zimmerman	1017.88	-154.91	19.444	2003	1	7268	Melastoma malabathricum	30	1	0	alien	1	1	39.3	5.1
Hawai'i Island	9	Zimmerman	1017.88	-154.91	19.444	2003	1	7236	Metrosideros polymorpha	34	1	0	native	NA	1	39.3	7.1
Hawai'i Island	9	Zimmerman	1017.88	-154.91	19.444	2003	1	7243	Metrosideros polymorpha	34	1	0	native	NA	1	39.3	5.6
Hawai'i Island	9	Zimmerman	1017.88	-154.91	19.444	2003	1	7254	Metrosideros polymorpha	34	1	0	native	NA	1	39.3	12
Hawai'i Island	9	Zimmerman	1017.88	-154.91	19.444	2003	1	7257	Metrosideros polymorpha	34	1	0	native	NA	1	39.3	13.2
Hawai'i Island	9	Zimmerman	1017.88	-154.91	19.444	2003	1	7263	Metrosideros polymorpha	34	1	0	native	NA	1	39.3	6.2
Hawai'i Island	9	Zimmerman	1017.88	-154.91	19.444	2003	1	7266	Metrosideros polymorpha	34	1	0	native	NA	1	39.3	11.2
Hawai'i Island	9	Zimmerman	1017.88	-154.91	19.444	2003	1	7283	Metrosideros polymorpha	34	1	0	native	NA	1	39.3	6.5
Hawai'i Island	9	Zimmerman	1017.88	-154.91	19.444	2003	1	7284	Metrosideros polymorpha	34	1	0	native	NA	1	39.3	8
Hawai'i Island	9	Zimmerman	1017.88	-154.91	19.444	2003	1	7285	Metrosideros polymorpha	34	1	0	native	NA	1	39.3	7.7
Hawai'i Island	9	Zimmerman	1017.88	-154.91	19.444	2003	1	7235	Metrosideros polymorpha	34	1	0	native	NA	1	39.3	5
Hawai'i Island	9	Zimmerman	1017.88	-154.91	19.444	2003	1	7245	Metrosideros polymorpha	34	1	0	native	NA	1	39.3	6.3
Hawai'i Island	9	Zimmerman	1017.88	-154.91	19.444	2003	1	7246	Metrosideros polymorpha	34	1	0	native	NA	1	39.3	10.3
Hawai'i Island	9	Zimmerman	1017.88	-154.91	19.444	2003	1	7262	Metrosideros polymorpha	34	1	0	native	NA	1	39.3	5.6
Hawai'i Island	9	Zimmerman	1017.88	-154.91	19.444	2003	1	7265	Metrosideros polymorpha	34	1	0	native	NA	1	39.3	6.8
Hawai'i Island	9	Zimmerman	1017.88	-154.91	19.444	2003	1	7273	Metrosideros polymorpha	34	1	0	native	NA	1	39.3	5.1
Hawai'i Island	9	Zimmerman	1017.88	-154.91	19.444	2003	1	7275	Metrosideros polymorpha	34	1	0	native	NA	1	39.3	13.1
Hawai'i Island	9	Zimmerman	1017.88	-154.91	19.444	2003	1	7280	Metrosideros polymorpha	34	1	0	native	NA	1	39.3	6.1
Hawai'i Island	9	Zimmerman	1017.88	-154.91	19.444	2003	1	7282	Metrosideros polymorpha	34	1	0	native	NA	1	39.3	9.1
Hawai'i Island	10	Zimmerman	1017.88	-154.91	19.444	2003	1	7454	Cibotium glaucum	14	0	0	native	NA	1	39.3	14
Hawai'i Island	10	Zimmerman	1017.88	-154.91	19.444	2003	1	7426	Cibotium glaucum	14	0	0	native	NA	1	39.3	13.2
Hawai'i Island	10	Zimmerman	1017.88	-154.91	19.444	2003	1	7451	Cibotium glaucum	14	0	0	native	NA	1	39.3	12.2
Hawai'i Island	10	Zimmerman	1017.88	-154.91	19.444	2003	1	7421	Cibotium glaucum	14	0	0	native	NA	1	39.3	8.3
Hawai'i Island	10	Zimmerman	1017.88	-154.91	19.444	2003	1	7440	Cibotium glaucum	14	0	0	native	NA	1	39.3	10
Hawai'i Island	10	Zimmerman	1017.88	-154.91	19.444	2003	1	7453	Cibotium glaucum	14	0	0	native	NA	1	39.3	16
Hawai'i Island	10	Zimmerman	1017.88	-154.91	19.444	2003	1	7410	Cibotium glaucum	14	0	0	native	NA	1	39.3	24
Hawai'i Island	10	Zimmerman	1017.88	-154.91	19.444	2003	1	7415	Cibotium glaucum	14	0	0	native	NA	1	39.3	21
Hawai'i Island	10	Zimmerman	1017.88	-154.91	19.444	2003	1	7405	Cibotium glaucum	14	0	0	native	NA	1	39.3	16.2
Hawai'i Island	10	Zimmerman	1017.88	-154.91	19.444	2003	1	7416	Cibotium glaucum	14	0	0	native	NA	1	39.3	11.7
Hawai'i Island	10	Zimmerman	1017.88	-154.91	19.444	2003	1	7417	Cibotium glaucum	14	0	0	native	NA	1	39.3	15.5
Hawai'i Island	10	Zimmerman	1017.88	-154.91	19.444	2003	1	7387	Cibotium glaucum	14	0	0	native	NA	1	39.3	17.1
Hawai'i Island	10	Zimmerman	1017.88	-154.91	19.444	2003	1	7409	Cibotium glaucum	14	0	0	native	NA	1	39.3	17.7
Hawai'i Island	10	Zimmerman	1017.88	-154.91	19.444	2003	1	7371	Cibotium glaucum	14	0	0	native	NA	1	39.3	7.5
Hawai'i Island	10	Zimmerman	1017.88	-154.91	19.444	2003	1	7384	Cibotium glaucum	14	0	0	native	NA	1	39.3	18.5
Hawai'i Island	10	Zimmerman	1017.88	-154.91	19.444	2003	1	7404	Cibotium glaucum	14	0	0	native	NA	1	39.3	20.1
Hawai'i Island	10	Zimmerman	1017.88	-154.91	19.444	2003	1	7390	Cibotium glaucum	14	0	0	native	NA	1	39.3	15.1
Hawai'i Island	10	Zimmerman	1017.88	-154.91	19.444	2003	1	7406	Cibotium glaucum	14	0	0	native	NA	1	39.3	9.8
Hawai'i Island	10	Zimmerman	1017.88	-154.91	19.444	2003	1	7422	Cibotium glaucum	14	0	0	native	NA	1	39.3	13.3
Hawai'i Island	10	Zimmerman	1017.88	-154.91	19.444	2003	1	7320	Cibotium glaucum	14	0	0	native	NA	1	39.3	18.7
Hawai'i Island	10	Zimmerman	1017.88	-154.91	19.444	2003	1	7407	Cibotium glaucum	14	0	0	native	NA	1	39.3	13.5
Hawai'i Island	10	Zimmerman	1017.88	-154.91	19.444	2003	1	7362	Cibotium glaucum	14	0	0	native	NA	1	39.3	14.1
Hawai'i Island	10	Zimmerman	1017.88	-154.91	19.444	2003	1	7359	Cibotium glaucum	14	0	0	native	NA	1	39.3	16.5
Hawai'i Island	10	Zimmerman	1017.88	-154.91	19.444	2003	1	7424	Cibotium glaucum	14	0	0	native	NA	1	39.3	16
Hawai'i Island	10	Zimmerman	1017.88	-154.91	19.444	2003	1	7435	Cibotium glaucum	14	0	0	native	NA	1	39.3	7.6
Hawai'i Island	10	Zimmerman	1017.88	-154.91	19.444	2003	1	7374	Cibotium glaucum	14	0	0	native	NA	1	39.3	18.3
Hawai'i Island	10	Zimmerman	1017.88	-154.91	19.444	2003	1	7400	Cibotium glaucum	14	0	0	native	NA	1	39.3	9.6
Hawai'i Island	10	Zimmerman	1017.88	-154.91	19.444	2003	1	7442	Cibotium glaucum	14	0	0	native	NA	1	39.3	17.2
Hawai'i Island	10	Zimmerman	1017.88	-154.91	19.444	2003	1	7324	Cibotium glaucum	14	0	0	native	NA	1	39.3	14.8
Hawai'i Island	10	Zimmerman	1017.88	-154.91	19.444	2003	1	7297	Cibotium glaucum	14	0	0	native	NA	1	39.3	13
Hawai'i Island	10	Zimmerman	1017.88	-154.91	19.444	2003	1	7399	Cibotium glaucum	14	0	0	native	NA	1	39.3	22.1
Hawai'i Island	10	Zimmerman	1017.88	-154.91	19.444	2003	1	7393	Cibotium glaucum	14	0	0	native	NA	1	39.3	21
Hawai'i Island	10	Zimmerman	1017.88	-154.91	19.444	2003	1	7315	Cibotium menziesii	14	0	0	native	NA	1	39.3	26
Hawai'i Island	10	Zimmerman	1017.88	-154.91	19.444	2003	1	7287	Cibotium menziesii	14	0	0	native	NA	1	39.3	19.2
Hawai'i Island	10	Zimmerman	1017.88	-154.91	19.444	2003	1	7303	Cibotium menziesii	14	0	0	native	NA	1	39.3	20.2
Hawai'i Island	10	Zimmerman	1017.88	-154.91	19.444	2003	1	7314	Cibotium menziesii	14	0	0	native	NA	1	39.3	12
Hawai'i Island	10	Zimmerman	1017.88	-154.91	19.444	2003	1	7313	Cibotium menziesii	14	0	0	native	NA	1	39.3	8.4
Hawai'i Island	10	Zimmerman	1017.88	-154.91	19.444	2003	1	7316	Cibotium menziesii	14	0	0	native	NA	1	39.3	7.3
Hawai'i Island	10	Zimmerman	1017.88	-154.91	19.444	2003	1	7330	Cibotium menziesii	14	0	0	native	NA	1	39.3	15
Hawai'i Island	10	Zimmerman	1017.88	-154.91	19.444	2003	1	7391	Cibotium menziesii	14	0	0	native	NA	1	39.3	20
Hawai'i Island	10	Zimmerman	1017.88	-154.91	19.444	2003	1	7372	Cibotium menziesii	14	0	0	native	NA	1	39.3	11
Hawai'i Island	10	Zimmerman	1017.88	-154.91	19.444	2003	1	7428	Cibotium menziesii	14	0	0	native	NA	1	9.82	30
Hawai'i Island	10	Zimmerman	1017.88	-154.91	19.444	2003	1	7300	Cibotium menziesii	14	0	0	native	NA	1	39.3	11.5
Hawai'i Island	10	Zimmerman	1017.88	-154.91	19.444	2003	1	7337	Cibotium menziesii	14	0	0	native	NA	1	39.3	11.6
Hawai'i Island	10	Zimmerman	1017.88	-154.91	19.444	2003	1	7425	Cibotium menziesii	14	0	0	native	NA	1	39.3	14
Hawai'i Island	10	Zimmerman	1017.88	-154.91	19.444	2003	1	7344	Cibotium menziesii	14	0	0	native	NA	1	39.3	25.5
Hawai'i Island	10	Zimmerman	1017.88	-154.91	19.444	2003	1	7383	Cibotium menziesii	14	0	0	native	NA	1	39.3	13
Hawai'i Island	10	Zimmerman	1017.88	-154.91	19.444	2003	1	7423	Cibotium menziesii	14	0	0	native	NA	1	39.3	12
Hawai'i Island	10	Zimmerman	1017.88	-154.91	19.444	2003	1	7355	Cibotium menziesii	14	0	0	native	NA	1	39.3	15.5
Hawai'i Island	10	Zimmerman	1017.88	-154.91	19.444	2003	1	7318	Cibotium menziesii	14	0	0	native	NA	1	39.3	17.6
Hawai'i Island	10	Zimmerman	1017.88	-154.91	19.444	2003	1	7322	Cibotium menziesii	14	0	0	native	NA	1	39.3	10.5
Hawai'i Island	10	Zimmerman	1017.88	-154.91	19.444	2003	1	7338	Cibotium menziesii	14	0	0	native	NA	1	39.3	17.3
Hawai'i Island	10	Zimmerman	1017.88	-154.91	19.444	2003	1	7398	Cibotium menziesii	14	0	0	native	NA	1	39.3	21.3
Hawai'i Island	10	Zimmerman	1017.88	-154.91	19.444	2003	1	7358	Cibotium menziesii	14	0	0	native	NA	1	39.3	18
Hawai'i Island	10	Zimmerman	1017.88	-154.91	19.444	2003	1	7360	Cibotium menziesii	14	0	0	native	NA	1	39.3	8.5
Hawai'i Island	10	Zimmerman	1017.88	-154.91	19.444	2003	1	7430	Cibotium spp.	14	0	0	native	NA	1	39.3	16.3
Hawai'i Island	10	Zimmerman	1017.88	-154.91	19.444	2003	1	7461	Melastoma malabathricum	30	1	0	alien	1	1	39.3	6.2
Hawai'i Island	10	Zimmerman	1017.88	-154.91	19.444	2003	1	7446	Melastoma malabathricum	30	1	0	alien	1	1	39.3	5.4
Hawai'i Island	10	Zimmerman	1017.88	-154.91	19.444	2003	1	7311	Melastoma malabathricum	30	1	0	alien	1	1	39.3	12
Hawai'i Island	10	Zimmerman	1017.88	-154.91	19.444	2003	1	7397	Melastoma malabathricum	30	1	0	alien	1	1	39.3	8.4
Hawai'i Island	10	Zimmerman	1017.88	-154.91	19.444	2003	1	7386	Melastoma malabathricum	30	1	0	alien	1	1	39.3	6.1
Hawai'i Island	10	Zimmerman	1017.88	-154.91	19.444	2003	1	7310	Melastoma malabathricum	30	1	0	alien	1	1	39.3	6.1
Hawai'i Island	10	Zimmerman	1017.88	-154.91	19.444	2003	1	7306	Melastoma malabathricum	30	1	0	alien	1	1	39.3	18.2
Hawai'i Island	10	Zimmerman	1017.88	-154.91	19.444	2003	1	7312	Melastoma malabathricum	30	1	0	alien	1	1	39.3	7
Hawai'i Island	10	Zimmerman	1017.88	-154.91	19.444	2003	1	7420	Melastoma malabathricum	30	1	0	alien	1	1	39.3	5.1
Hawai'i Island	10	Zimmerman	1017.88	-154.91	19.444	2003	1	7336	Melastoma malabathricum	30	1	0	alien	1	1	39.3	5
Hawai'i Island	10	Zimmerman	1017.88	-154.91	19.444	2003	1	7286	Melastoma malabathricum	30	1	0	alien	1	1	39.3	5
Hawai'i Island	10	Zimmerman	1017.88	-154.91	19.444	2003	1	7292	Melastoma malabathricum	30	1	0	alien	1	1	39.3	5
Hawai'i Island	10	Zimmerman	1017.88	-154.91	19.444	2003	1	7379	Melastoma malabathricum	30	1	0	alien	1	1	39.3	8.5
Hawai'i Island	10	Zimmerman	1017.88	-154.91	19.444	2003	1	7329	Melastoma malabathricum	30	1	0	alien	1	1	39.3	6
Hawai'i Island	10	Zimmerman	1017.88	-154.91	19.444	2003	1	7307	Melastoma malabathricum	30	1	0	alien	1	1	39.3	6.5
Hawai'i Island	10	Zimmerman	1017.88	-154.91	19.444	2003	1	7365	Melastoma malabathricum	30	1	0	alien	1	1	39.3	6.3
Hawai'i Island	10	Zimmerman	1017.88	-154.91	19.444	2003	1	7354	Melastoma malabathricum	30	1	0	alien	1	1	39.3	7.3
Hawai'i Island	10	Zimmerman	1017.88	-154.91	19.444	2003	1	7305	Melastoma malabathricum	30	1	0	alien	1	1	39.3	5.5
Hawai'i Island	10	Zimmerman	1017.88	-154.91	19.444	2003	1	7335	Melastoma malabathricum	30	1	0	alien	1	1	39.3	7.6
Hawai'i Island	10	Zimmerman	1017.88	-154.91	19.444	2003	1	7381	Melastoma malabathricum	30	1	0	alien	1	1	39.3	6.8
Hawai'i Island	10	Zimmerman	1017.88	-154.91	19.444	2003	1	7361	Melastoma malabathricum	30	1	0	alien	1	1	39.3	6.5
Hawai'i Island	10	Zimmerman	1017.88	-154.91	19.444	2003	1	7395	Metrosideros polymorpha	34	1	0	native	NA	1	39.3	6.6
Hawai'i Island	10	Zimmerman	1017.88	-154.91	19.444	2003	1	7291	Metrosideros polymorpha	34	1	0	native	NA	1	39.3	20
Hawai'i Island	10	Zimmerman	1017.88	-154.91	19.444	2003	1	7364	Metrosideros polymorpha	34	1	0	native	NA	1	39.3	14.6
Hawai'i Island	10	Zimmerman	1017.88	-154.91	19.444	2003	1	7367	Metrosideros polymorpha	34	1	0	native	NA	1	39.3	24
Hawai'i Island	10	Zimmerman	1017.88	-154.91	19.444	2003	1	7429	Psidium cattleianum	34	1	0	alien	1	1	39.3	7.9
Hawai'i Island	10	Zimmerman	1017.88	-154.91	19.444	2003	1	7448	Psidium cattleianum	34	1	0	alien	1	1	39.3	5
Hawai'i Island	10	Zimmerman	1017.88	-154.91	19.444	2003	1	7436	Psidium cattleianum	34	1	0	alien	1	1	39.3	7.2
Hawai'i Island	10	Zimmerman	1017.88	-154.91	19.444	2003	1	7459	Psidium cattleianum	34	1	0	alien	1	1	39.3	11.1
Hawai'i Island	10	Zimmerman	1017.88	-154.91	19.444	2003	1	7431	Psidium cattleianum	34	1	0	alien	1	1	39.3	6.2
Hawai'i Island	10	Zimmerman	1017.88	-154.91	19.444	2003	1	7434	Psidium cattleianum	34	1	0	alien	1	1	39.3	8.4
Hawai'i Island	10	Zimmerman	1017.88	-154.91	19.444	2003	1	7450	Psidium cattleianum	34	1	0	alien	1	1	39.3	6.6
Hawai'i Island	10	Zimmerman	1017.88	-154.91	19.444	2003	1	7444	Psidium cattleianum	34	1	0	alien	1	1	39.3	11.9
Hawai'i Island	10	Zimmerman	1017.88	-154.91	19.444	2003	1	7457	Psidium cattleianum	34	1	0	alien	1	1	39.3	8.5
Hawai'i Island	10	Zimmerman	1017.88	-154.91	19.444	2003	1	7447	Psidium cattleianum	34	1	0	alien	1	1	39.3	9.8
Hawai'i Island	10	Zimmerman	1017.88	-154.91	19.444	2003	1	7445	Psidium cattleianum	34	1	0	alien	1	1	39.3	7.3
Hawai'i Island	10	Zimmerman	1017.88	-154.91	19.444	2003	1	7301	Psidium cattleianum	34	1	0	alien	1	1	39.3	8.2
Hawai'i Island	10	Zimmerman	1017.88	-154.91	19.444	2003	1	7452	Psidium cattleianum	34	1	0	alien	1	1	39.3	11.3
Hawai'i Island	10	Zimmerman	1017.88	-154.91	19.444	2003	1	7456	Psidium cattleianum	34	1	0	alien	1	1	39.3	8.7
Hawai'i Island	10	Zimmerman	1017.88	-154.91	19.444	2003	1	7298	Psidium cattleianum	34	1	0	alien	1	1	39.3	8.3
Hawai'i Island	10	Zimmerman	1017.88	-154.91	19.444	2003	1	7412	Psidium cattleianum	34	1	0	alien	1	1	39.3	5.6
Hawai'i Island	10	Zimmerman	1017.88	-154.91	19.444	2003	1	7375	Psidium cattleianum	34	1	0	alien	1	1	39.3	9.2
Hawai'i Island	10	Zimmerman	1017.88	-154.91	19.444	2003	1	7333	Psidium cattleianum	34	1	0	alien	1	1	39.3	6.3
Hawai'i Island	10	Zimmerman	1017.88	-154.91	19.444	2003	1	7332	Psidium cattleianum	34	1	0	alien	1	1	39.3	10.1
Hawai'i Island	10	Zimmerman	1017.88	-154.91	19.444	2003	1	7347	Psidium cattleianum	34	1	0	alien	1	1	39.3	11.1
Hawai'i Island	10	Zimmerman	1017.88	-154.91	19.444	2003	1	7366	Psidium cattleianum	34	1	0	alien	1	1	39.3	10.9
Hawai'i Island	10	Zimmerman	1017.88	-154.91	19.444	2003	1	7368	Psidium cattleianum	34	1	0	alien	1	1	39.3	7.5
Hawai'i Island	10	Zimmerman	1017.88	-154.91	19.444	2003	1	7350	Psidium cattleianum	34	1	0	alien	1	1	39.3	8.8
Hawai'i Island	10	Zimmerman	1017.88	-154.91	19.444	2003	1	7341	Psidium cattleianum	34	1	0	alien	1	1	39.3	8.2
Hawai'i Island	10	Zimmerman	1017.88	-154.91	19.444	2003	1	7357	Psidium cattleianum	34	1	0	alien	1	1	39.3	5.7
Hawai'i Island	10	Zimmerman	1017.88	-154.91	19.444	2003	1	7308	Psidium cattleianum	34	1	0	alien	1	1	39.3	6.6
Hawai'i Island	10	Zimmerman	1017.88	-154.91	19.444	2003	1	7317	Psidium cattleianum	34	1	0	alien	1	1	39.3	6
Hawai'i Island	10	Zimmerman	1017.88	-154.91	19.444	2003	1	7295	Psidium cattleianum	34	1	0	alien	1	1	39.3	7.5
Hawai'i Island	10	Zimmerman	1017.88	-154.91	19.444	2003	1	7331	Psidium cattleianum	34	1	0	alien	1	1	39.3	9.3
Hawai'i Island	10	Zimmerman	1017.88	-154.91	19.444	2003	1	7348	Psidium cattleianum	34	1	0	alien	1	1	39.3	6
Hawai'i Island	10	Zimmerman	1017.88	-154.91	19.444	2003	1	7326	Psidium cattleianum	34	1	0	alien	1	1	39.3	8.6
Hawai'i Island	10	Zimmerman	1017.88	-154.91	19.444	2003	1	7323	Psidium cattleianum	34	1	0	alien	1	1	39.3	9
Hawai'i Island	10	Zimmerman	1017.88	-154.91	19.444	2003	1	7385	Psidium guajava	34	1	0	alien	1	1	39.3	14
Hawai'i Island	10	Zimmerman	1017.88	-154.91	19.444	2003	1	7388	Psychotria spp.	47	1	0	native	NA	1	39.3	6.9
Hawai'i Island	10	Zimmerman	1017.88	-154.91	19.444	2003	1	7411	Psychotria spp.	47	1	0	native	NA	1	39.3	5.6
Hawai'i Island	11	Zimmerman	1017.88	-154.91	19.444	2003	1	7498	Cibotium glaucum	14	0	0	native	NA	1	39.3	16.2
Hawai'i Island	11	Zimmerman	1017.88	-154.91	19.444	2003	1	7499	Cibotium glaucum	14	0	0	native	NA	1	39.3	24.3
Hawai'i Island	11	Zimmerman	1017.88	-154.91	19.444	2003	1	7568	Cibotium glaucum	14	0	0	native	NA	1	39.3	19
Hawai'i Island	11	Zimmerman	1017.88	-154.91	19.444	2003	1	7547	Cibotium glaucum	14	0	0	native	NA	1	39.3	23
Hawai'i Island	11	Zimmerman	1017.88	-154.91	19.444	2003	1	7554	Cibotium glaucum	14	0	0	native	NA	1	39.3	11.5
Hawai'i Island	11	Zimmerman	1017.88	-154.91	19.444	2003	1	7510	Cibotium glaucum	14	0	0	native	NA	1	39.3	21.3
Hawai'i Island	11	Zimmerman	1017.88	-154.91	19.444	2003	1	7533	Cibotium glaucum	14	0	0	native	NA	1	39.3	18
Hawai'i Island	11	Zimmerman	1017.88	-154.91	19.444	2003	1	7584	Cibotium glaucum	14	0	0	native	NA	1	39.3	20.9
Hawai'i Island	11	Zimmerman	1017.88	-154.91	19.444	2003	1	7592	Cibotium glaucum	14	0	0	native	NA	1	39.3	14
Hawai'i Island	11	Zimmerman	1017.88	-154.91	19.444	2003	1	7532	Cibotium glaucum	14	0	0	native	NA	1	39.3	21.2
Hawai'i Island	11	Zimmerman	1017.88	-154.91	19.444	2003	1	7513	Cibotium glaucum	14	0	0	native	NA	1	39.3	23.9
Hawai'i Island	11	Zimmerman	1017.88	-154.91	19.444	2003	1	7527	Cibotium glaucum	14	0	0	native	NA	1	39.3	9
Hawai'i Island	11	Zimmerman	1017.88	-154.91	19.444	2003	1	7496	Cibotium menziesii	14	0	0	native	NA	1	39.3	11
Hawai'i Island	11	Zimmerman	1017.88	-154.91	19.444	2003	1	7508	Cibotium menziesii	14	0	0	native	NA	1	39.3	19.9
Hawai'i Island	11	Zimmerman	1017.88	-154.91	19.444	2003	1	7488	Cibotium menziesii	14	0	0	native	NA	1	39.3	8
Hawai'i Island	11	Zimmerman	1017.88	-154.91	19.444	2003	1	7480	Cibotium menziesii	14	0	0	native	NA	1	39.3	11
Hawai'i Island	11	Zimmerman	1017.88	-154.91	19.444	2003	1	7552	Cibotium menziesii	14	0	0	native	NA	1	39.3	9.9
Hawai'i Island	11	Zimmerman	1017.88	-154.91	19.444	2003	1	7491	Cibotium menziesii	14	0	0	native	NA	1	39.3	18
Hawai'i Island	11	Zimmerman	1017.88	-154.91	19.444	2003	1	7471	Cibotium menziesii	14	0	0	native	NA	1	39.3	16
Hawai'i Island	11	Zimmerman	1017.88	-154.91	19.444	2003	1	7551	Cibotium menziesii	14	0	0	native	NA	1	39.3	24.3
Hawai'i Island	11	Zimmerman	1017.88	-154.91	19.444	2003	1	7541	Cibotium menziesii	14	0	0	native	NA	1	39.3	23.5
Hawai'i Island	11	Zimmerman	1017.88	-154.91	19.444	2003	1	7539	Cibotium menziesii	14	0	0	native	NA	1	39.3	12
Hawai'i Island	11	Zimmerman	1017.88	-154.91	19.444	2003	1	7473	Cibotium menziesii	14	0	0	native	NA	1	39.3	7.3
Hawai'i Island	11	Zimmerman	1017.88	-154.91	19.444	2003	1	7489	Cibotium menziesii	14	0	0	native	NA	1	39.3	18
Hawai'i Island	11	Zimmerman	1017.88	-154.91	19.444	2003	1	7530	Cibotium menziesii	14	0	0	native	NA	1	39.3	14.6
Hawai'i Island	11	Zimmerman	1017.88	-154.91	19.444	2003	1	7569	Cibotium menziesii	14	0	0	native	NA	1	39.3	15.9
Hawai'i Island	11	Zimmerman	1017.88	-154.91	19.444	2003	1	7580	Cibotium menziesii	14	0	0	native	NA	1	39.3	16.1
Hawai'i Island	11	Zimmerman	1017.88	-154.91	19.444	2003	1	7578	Cibotium menziesii	14	0	0	native	NA	1	39.3	9.3
Hawai'i Island	11	Zimmerman	1017.88	-154.91	19.444	2003	1	7521	Cibotium menziesii	14	0	0	native	NA	1	39.3	15.5
Hawai'i Island	11	Zimmerman	1017.88	-154.91	19.444	2003	1	7566	Cibotium menziesii	14	0	0	native	NA	1	39.3	10.9
Hawai'i Island	11	Zimmerman	1017.88	-154.91	19.444	2003	1	7587	Cibotium menziesii	14	0	0	native	NA	1	39.3	9.3
Hawai'i Island	11	Zimmerman	1017.88	-154.91	19.444	2003	1	7469	Diospyros sandwicensis	21	1	0	native	NA	1	39.3	11.5
Hawai'i Island	11	Zimmerman	1017.88	-154.91	19.444	2003	1	7560	Diospyros sandwicensis	21	1	0	native	NA	1	39.3	17
Hawai'i Island	11	Zimmerman	1017.88	-154.91	19.444	2003	1	7464	Metrosideros polymorpha	34	1	0	native	NA	1	39.3	15
Hawai'i Island	11	Zimmerman	1017.88	-154.91	19.444	2003	1	7500	Metrosideros polymorpha	34	1	0	native	NA	1	9.82	54.5
Hawai'i Island	11	Zimmerman	1017.88	-154.91	19.444	2003	1	7505	Metrosideros polymorpha	34	1	0	native	NA	1	9.82	53.5
Hawai'i Island	11	Zimmerman	1017.88	-154.91	19.444	2003	1	7511	Metrosideros polymorpha	34	1	0	native	NA	1	39.3	14.5
Hawai'i Island	11	Zimmerman	1017.88	-154.91	19.444	2003	1	7515	Metrosideros polymorpha	34	1	0	native	NA	1	9.82	35
Hawai'i Island	11	Zimmerman	1017.88	-154.91	19.444	2003	1	7522	Metrosideros polymorpha	34	1	0	native	NA	1	39.3	22.8
Hawai'i Island	11	Zimmerman	1017.88	-154.91	19.444	2003	1	7524	Metrosideros polymorpha	34	1	0	native	NA	1	39.3	22.6
Hawai'i Island	11	Zimmerman	1017.88	-154.91	19.444	2003	1	7528	Metrosideros polymorpha	34	1	0	native	NA	1	9.82	31.9
Hawai'i Island	11	Zimmerman	1017.88	-154.91	19.444	2003	1	7534	Metrosideros polymorpha	34	1	0	native	NA	1	9.82	52.1
Hawai'i Island	11	Zimmerman	1017.88	-154.91	19.444	2003	1	7540	Metrosideros polymorpha	34	1	0	native	NA	1	9.82	61.5
Hawai'i Island	11	Zimmerman	1017.88	-154.91	19.444	2003	1	7542	Metrosideros polymorpha	34	1	0	native	NA	1	9.82	32.9
Hawai'i Island	11	Zimmerman	1017.88	-154.91	19.444	2003	1	7556	Metrosideros polymorpha	34	1	0	native	NA	1	39.3	18
Hawai'i Island	11	Zimmerman	1017.88	-154.91	19.444	2003	1	7558	Metrosideros polymorpha	34	1	0	native	NA	1	9.82	59
Hawai'i Island	11	Zimmerman	1017.88	-154.91	19.444	2003	1	7565	Metrosideros polymorpha	34	1	0	native	NA	1	9.82	55.3
Hawai'i Island	11	Zimmerman	1017.88	-154.91	19.444	2003	1	7572	Metrosideros polymorpha	34	1	0	native	NA	1	9.82	34.8
Hawai'i Island	11	Zimmerman	1017.88	-154.91	19.444	2003	1	7575	Metrosideros polymorpha	34	1	0	native	NA	1	39.3	28.5
Hawai'i Island	11	Zimmerman	1017.88	-154.91	19.444	2003	1	7577	Metrosideros polymorpha	34	1	0	native	NA	1	9.82	33.5
Hawai'i Island	11	Zimmerman	1017.88	-154.91	19.444	2003	1	7581	Metrosideros polymorpha	34	1	0	native	NA	1	9.82	34.7
Hawai'i Island	11	Zimmerman	1017.88	-154.91	19.444	2003	1	7582	Metrosideros polymorpha	34	1	0	native	NA	1	9.82	43.3
Hawai'i Island	11	Zimmerman	1017.88	-154.91	19.444	2003	1	7583	Metrosideros polymorpha	34	1	0	native	NA	1	9.82	35.2
Hawai'i Island	11	Zimmerman	1017.88	-154.91	19.444	2003	1	7586	Metrosideros polymorpha	34	1	0	native	NA	1	9.82	56.2
Hawai'i Island	11	Zimmerman	1017.88	-154.91	19.444	2003	1	7589	Metrosideros polymorpha	34	1	0	native	NA	1	9.82	45.8
Hawai'i Island	11	Zimmerman	1017.88	-154.91	19.444	2003	1	7590	Metrosideros polymorpha	34	1	0	native	NA	1	39.3	25
Hawai'i Island	11	Zimmerman	1017.88	-154.91	19.444	2003	1	7478	Psidium cattleianum	34	1	0	alien	1	1	39.3	7.5
Hawai'i Island	11	Zimmerman	1017.88	-154.91	19.444	2003	1	7482	Psidium cattleianum	34	1	0	alien	1	1	39.3	5.7
Hawai'i Island	11	Zimmerman	1017.88	-154.91	19.444	2003	1	7503	Psidium cattleianum	34	1	0	alien	1	1	39.3	13.9
Hawai'i Island	11	Zimmerman	1017.88	-154.91	19.444	2003	1	7476	Psidium cattleianum	34	1	0	alien	1	1	39.3	9.2
Hawai'i Island	11	Zimmerman	1017.88	-154.91	19.444	2003	1	7538	Psidium cattleianum	34	1	0	alien	1	1	39.3	5.2
Hawai'i Island	11	Zimmerman	1017.88	-154.91	19.444	2003	1	7517	Psychotria spp.	47	1	0	native	NA	1	39.3	8
Hawai'i Island	11	Zimmerman	1017.88	-154.91	19.444	2003	1	7573	Psychotria spp.	47	1	0	native	NA	1	39.3	7.8
Hawai'i Island	11	Zimmerman	1017.88	-154.91	19.444	2003	1	7497	Psychotria spp.	47	1	0	native	NA	1	39.3	5.3
Hawai'i Island	12	Zimmerman	1017.88	-154.91	19.444	2003	1	7691	Cibotium menziesii	14	0	0	native	NA	1	39.3	8.3
Hawai'i Island	12	Zimmerman	1017.88	-154.91	19.444	2003	1	7698	Cibotium menziesii	14	0	0	native	NA	1	39.3	22
Hawai'i Island	12	Zimmerman	1017.88	-154.91	19.444	2003	1	7608	Cibotium menziesii	14	0	0	native	NA	1	39.3	16.4
Hawai'i Island	12	Zimmerman	1017.88	-154.91	19.444	2003	1	7711	Cibotium menziesii	14	0	0	native	NA	1	39.3	11.4
Hawai'i Island	12	Zimmerman	1017.88	-154.91	19.444	2003	1	7706	Cibotium menziesii	14	0	0	native	NA	1	39.3	10.2
Hawai'i Island	12	Zimmerman	1017.88	-154.91	19.444	2003	1	7714	Cibotium menziesii	14	0	0	native	NA	1	39.3	11.3
Hawai'i Island	12	Zimmerman	1017.88	-154.91	19.444	2003	1	7612	Cibotium menziesii	14	0	0	native	NA	1	39.3	6.2
Hawai'i Island	12	Zimmerman	1017.88	-154.91	19.444	2003	1	7646	Cibotium menziesii	14	0	0	native	NA	1	39.3	10.1
Hawai'i Island	12	Zimmerman	1017.88	-154.91	19.444	2003	1	7629	Cibotium menziesii	14	0	0	native	NA	1	39.3	16
Hawai'i Island	12	Zimmerman	1017.88	-154.91	19.444	2003	1	7640	Cibotium menziesii	14	0	0	native	NA	1	39.3	10.6
Hawai'i Island	12	Zimmerman	1017.88	-154.91	19.444	2003	1	7605	Cibotium menziesii	14	0	0	native	NA	1	39.3	12.5
Hawai'i Island	12	Zimmerman	1017.88	-154.91	19.444	2003	1	7606	Cibotium menziesii	14	0	0	native	NA	1	39.3	17
Hawai'i Island	12	Zimmerman	1017.88	-154.91	19.444	2003	1	7653	Cibotium menziesii	14	0	0	native	NA	1	39.3	10
Hawai'i Island	12	Zimmerman	1017.88	-154.91	19.444	2003	1	7672	Cibotium menziesii	14	0	0	native	NA	1	39.3	17.2
Hawai'i Island	12	Zimmerman	1017.88	-154.91	19.444	2003	1	7685	Cibotium menziesii	14	0	0	native	NA	1	39.3	15.8
Hawai'i Island	12	Zimmerman	1017.88	-154.91	19.444	2003	1	7704	Cibotium menziesii	14	0	0	native	NA	1	39.3	5.5
Hawai'i Island	12	Zimmerman	1017.88	-154.91	19.444	2003	1	7636	Cibotium menziesii	14	0	0	native	NA	1	39.3	13.4
Hawai'i Island	12	Zimmerman	1017.88	-154.91	19.444	2003	1	7614	Cibotium menziesii	14	0	0	native	NA	1	39.3	7.3
Hawai'i Island	12	Zimmerman	1017.88	-154.91	19.444	2003	1	7613	Cibotium menziesii	14	0	0	native	NA	1	39.3	14
Hawai'i Island	12	Zimmerman	1017.88	-154.91	19.444	2003	1	7669	Cibotium menziesii	14	0	0	native	NA	1	39.3	10.1
Hawai'i Island	12	Zimmerman	1017.88	-154.91	19.444	2003	1	7661	Diospyros sandwicensis	21	1	0	native	NA	1	39.3	6.4
Hawai'i Island	12	Zimmerman	1017.88	-154.91	19.444	2003	1	7595	Metrosideros polymorpha	34	1	0	native	NA	1	9.82	68
Hawai'i Island	12	Zimmerman	1017.88	-154.91	19.444	2003	1	7599	Metrosideros polymorpha	34	1	0	native	NA	1	39.3	10
Hawai'i Island	12	Zimmerman	1017.88	-154.91	19.444	2003	1	7604	Metrosideros polymorpha	34	1	0	native	NA	1	9.82	30
Hawai'i Island	12	Zimmerman	1017.88	-154.91	19.444	2003	1	7619	Metrosideros polymorpha	34	1	0	native	NA	1	9.82	41.6
Hawai'i Island	12	Zimmerman	1017.88	-154.91	19.444	2003	1	7643	Metrosideros polymorpha	34	1	0	native	NA	1	9.82	36.6
Hawai'i Island	12	Zimmerman	1017.88	-154.91	19.444	2003	1	7645	Metrosideros polymorpha	34	1	0	native	NA	1	9.82	34
Hawai'i Island	12	Zimmerman	1017.88	-154.91	19.444	2003	1	7647	Metrosideros polymorpha	34	1	0	native	NA	1	9.82	78
Hawai'i Island	12	Zimmerman	1017.88	-154.91	19.444	2003	1	7658	Metrosideros polymorpha	34	1	0	native	NA	1	9.82	65.5
Hawai'i Island	12	Zimmerman	1017.88	-154.91	19.444	2003	1	7659	Metrosideros polymorpha	34	1	0	native	NA	1	9.82	31.1
Hawai'i Island	12	Zimmerman	1017.88	-154.91	19.444	2003	1	7662	Metrosideros polymorpha	34	1	0	native	NA	1	9.82	36.5
Hawai'i Island	12	Zimmerman	1017.88	-154.91	19.444	2003	1	7673	Metrosideros polymorpha	34	1	0	native	NA	1	9.82	46
Hawai'i Island	12	Zimmerman	1017.88	-154.91	19.444	2003	1	7680	Metrosideros polymorpha	34	1	0	native	NA	1	39.3	22.3
Hawai'i Island	12	Zimmerman	1017.88	-154.91	19.444	2003	1	7684	Metrosideros polymorpha	34	1	0	native	NA	1	9.82	34.5
Hawai'i Island	12	Zimmerman	1017.88	-154.91	19.444	2003	1	7689	Metrosideros polymorpha	34	1	0	native	NA	1	39.3	23.5
Hawai'i Island	12	Zimmerman	1017.88	-154.91	19.444	2003	1	7693	Metrosideros polymorpha	34	1	0	native	NA	1	9.82	35.5
Hawai'i Island	12	Zimmerman	1017.88	-154.91	19.444	2003	1	7699	Metrosideros polymorpha	34	1	0	native	NA	1	9.82	37
Hawai'i Island	12	Zimmerman	1017.88	-154.91	19.444	2003	1	7700	Metrosideros polymorpha	34	1	0	native	NA	1	9.82	38.6
Hawai'i Island	12	Zimmerman	1017.88	-154.91	19.444	2003	1	7701	Metrosideros polymorpha	34	1	0	native	NA	1	9.82	31.3
Hawai'i Island	12	Zimmerman	1017.88	-154.91	19.444	2003	1	7709	Metrosideros polymorpha	34	1	0	native	NA	1	9.82	35.9
Hawai'i Island	12	Zimmerman	1017.88	-154.91	19.444	2003	1	7710	Metrosideros polymorpha	34	1	0	native	NA	1	9.82	41
Hawai'i Island	12	Zimmerman	1017.88	-154.91	19.444	2003	1	7713	Metrosideros polymorpha	34	1	0	native	NA	1	9.82	42.2
Hawai'i Island	12	Zimmerman	1017.88	-154.91	19.444	2003	1	7715	Metrosideros polymorpha	34	1	0	native	NA	1	39.3	11.2
Hawai'i Island	12	Zimmerman	1017.88	-154.91	19.444	2003	1	7716	Metrosideros polymorpha	34	1	0	native	NA	1	9.82	32.1
Hawai'i Island	12	Zimmerman	1017.88	-154.91	19.444	2003	1	7719	Metrosideros polymorpha	34	1	0	native	NA	1	9.82	35.7
Hawai'i Island	12	Zimmerman	1017.88	-154.91	19.444	2003	1	7649	Psidium cattleianum	34	1	0	alien	1	1	39.3	11.9
Hawai'i Island	12	Zimmerman	1017.88	-154.91	19.444	2003	1	7654	Psidium cattleianum	34	1	0	alien	1	1	39.3	9.4
Hawai'i Island	12	Zimmerman	1017.88	-154.91	19.444	2003	1	7644	Psidium cattleianum	34	1	0	alien	1	1	39.3	15.6
Hawai'i Island	12	Zimmerman	1017.88	-154.91	19.444	2003	1	7650	Psidium cattleianum	34	1	0	alien	1	1	39.3	9.8
Hawai'i Island	12	Zimmerman	1017.88	-154.91	19.444	2003	1	7641	Psidium cattleianum	34	1	0	alien	1	1	39.3	8.4
Hawai'i Island	12	Zimmerman	1017.88	-154.91	19.444	2003	1	7611	Psidium cattleianum	34	1	0	alien	1	1	39.3	11.7
Hawai'i Island	12	Zimmerman	1017.88	-154.91	19.444	2003	1	7622	Psidium cattleianum	34	1	0	alien	1	1	39.3	14.9
Hawai'i Island	12	Zimmerman	1017.88	-154.91	19.444	2003	1	7624	Psidium cattleianum	34	1	0	alien	1	1	39.3	10.6
Hawai'i Island	12	Zimmerman	1017.88	-154.91	19.444	2003	1	7637	Psidium cattleianum	34	1	0	alien	1	1	39.3	5.1
Hawai'i Island	12	Zimmerman	1017.88	-154.91	19.444	2003	1	7692	Psidium cattleianum	34	1	0	alien	1	1	39.3	11.1
Hawai'i Island	12	Zimmerman	1017.88	-154.91	19.444	2003	1	7625	Psidium cattleianum	34	1	0	alien	1	1	39.3	8.3
Hawai'i Island	12	Zimmerman	1017.88	-154.91	19.444	2003	1	7615	Psidium cattleianum	34	1	0	alien	1	1	39.3	7.7
Hawai'i Island	12	Zimmerman	1017.88	-154.91	19.444	2003	1	7648	Psidium cattleianum	34	1	0	alien	1	1	39.3	5.2
Hawai'i Island	12	Zimmerman	1017.88	-154.91	19.444	2003	1	7627	Psidium cattleianum	34	1	0	alien	1	1	39.3	9.3
Hawai'i Island	12	Zimmerman	1017.88	-154.91	19.444	2003	1	7623	Psidium cattleianum	34	1	0	alien	1	1	39.3	13.3
Hawai'i Island	12	Zimmerman	1017.88	-154.91	19.444	2003	1	7630	Psidium cattleianum	34	1	0	alien	1	1	39.3	5.2
Hawai'i Island	12	Zimmerman	1017.88	-154.91	19.444	2003	1	7632	Psidium cattleianum	34	1	0	alien	1	1	39.3	7.3
Hawai'i Island	12	Zimmerman	1017.88	-154.91	19.444	2003	1	7609	Psidium cattleianum	34	1	0	alien	1	1	39.3	15
Hawai'i Island	12	Zimmerman	1017.88	-154.91	19.444	2003	1	7617	Psidium cattleianum	34	1	0	alien	1	1	39.3	13
Hawai'i Island	12	Zimmerman	1017.88	-154.91	19.444	2003	1	7635	Psidium cattleianum	34	1	0	alien	1	1	39.3	18.5
Hawai'i Island	12	Zimmerman	1017.88	-154.91	19.444	2003	1	7638	Psidium cattleianum	34	1	0	alien	1	1	39.3	6.5
Hawai'i Island	12	Zimmerman	1017.88	-154.91	19.444	2003	1	7677	Psidium cattleianum	34	1	0	alien	1	1	39.3	11.6
Hawai'i Island	12	Zimmerman	1017.88	-154.91	19.444	2003	1	7696	Psidium cattleianum	34	1	0	alien	1	1	39.3	7.1
Hawai'i Island	12	Zimmerman	1017.88	-154.91	19.444	2003	1	7621	Psidium cattleianum	34	1	0	alien	1	1	39.3	5.6
Hawai'i Island	12	Zimmerman	1017.88	-154.91	19.444	2003	1	7618	Psidium cattleianum	34	1	0	alien	1	1	39.3	6.3
Hawai'i Island	12	Zimmerman	1017.88	-154.91	19.444	2003	1	7674	Psidium cattleianum	34	1	0	alien	1	1	39.3	5
Hawai'i Island	12	Zimmerman	1017.88	-154.91	19.444	2003	1	7688	Psidium cattleianum	34	1	0	alien	1	1	39.3	5.6
Hawai'i Island	12	Zimmerman	1017.88	-154.91	19.444	2003	1	7600	Psidium cattleianum	34	1	0	alien	1	1	39.3	12.3
Hawai'i Island	12	Zimmerman	1017.88	-154.91	19.444	2003	1	7668	Psidium cattleianum	34	1	0	alien	1	1	39.3	10
Hawai'i Island	12	Zimmerman	1017.88	-154.91	19.444	2003	1	7670	Psidium cattleianum	34	1	0	alien	1	1	39.3	5
Hawai'i Island	12	Zimmerman	1017.88	-154.91	19.444	2003	1	7682	Psidium cattleianum	34	1	0	alien	1	1	39.3	12.2
Hawai'i Island	12	Zimmerman	1017.88	-154.91	19.444	2003	1	7681	Psidium cattleianum	34	1	0	alien	1	1	39.3	9.4
Hawai'i Island	12	Zimmerman	1017.88	-154.91	19.444	2003	1	7594	Psidium cattleianum	34	1	0	alien	1	1	39.3	9
Hawai'i Island	12	Zimmerman	1017.88	-154.91	19.444	2003	1	7703	Psidium cattleianum	34	1	0	alien	1	1	39.3	11.9
Hawai'i Island	12	Zimmerman	1017.88	-154.91	19.444	2003	1	7679	Psychotria spp.	47	1	0	native	NA	1	39.3	9.7
Hawai'i Island	12	Zimmerman	1017.88	-154.91	19.444	2003	1	7639	Polyscias hawaiensis	6	1	0	native	NA	1	39.3	12.8
Hawai'i Island	12	Zimmerman	1017.88	-154.91	19.444	2003	1	7596	Polyscias hawaiensis	6	1	0	native	NA	1	9.82	55.5
Hawai'i Island	12	Zimmerman	1017.88	-154.91	19.444	2003	1	7601	Polyscias hawaiensis	6	1	0	native	NA	1	9.82	48.8
Hawai'i Island	12	Zimmerman	1017.88	-154.91	19.444	2003	1	7607	Polyscias hawaiensis	6	1	0	native	NA	1	9.82	43.6
Hawai'i Island	12	Zimmerman	1017.88	-154.91	19.444	2003	1	7707	Polyscias hawaiensis	6	1	0	native	NA	1	9.82	30
Hawai'i Island	12	Zimmerman	1017.88	-154.91	19.444	2003	1	7626	Polyscias hawaiensis	6	1	0	native	NA	1	9.82	63.9
Hawai'i Island	12	Zimmerman	1017.88	-154.91	19.444	2003	1	7603	Polyscias hawaiensis	6	1	0	native	NA	1	9.82	39
Hawai'i Island	12	Zimmerman	1017.88	-154.91	19.444	2003	1	7602	Polyscias hawaiensis	6	1	0	native	NA	1	39.3	14
Hawai'i Island	13	Zimmerman	1017.88	-154.91	19.444	2003	1	7817	Cibotium glaucum	14	0	0	native	NA	1	39.3	13.1
Hawai'i Island	13	Zimmerman	1017.88	-154.91	19.444	2003	1	7853	Cibotium menziesii	14	0	0	native	NA	1	39.3	13
Hawai'i Island	13	Zimmerman	1017.88	-154.91	19.444	2003	1	7812	Cibotium menziesii	14	0	0	native	NA	1	39.3	13.6
Hawai'i Island	13	Zimmerman	1017.88	-154.91	19.444	2003	1	7850	Cibotium menziesii	14	0	0	native	NA	1	39.3	18
Hawai'i Island	13	Zimmerman	1017.88	-154.91	19.444	2003	1	7764	Cibotium menziesii	14	0	0	native	NA	1	39.3	14
Hawai'i Island	13	Zimmerman	1017.88	-154.91	19.444	2003	1	7768	Cibotium menziesii	14	0	0	native	NA	1	39.3	6.5
Hawai'i Island	13	Zimmerman	1017.88	-154.91	19.444	2003	1	7833	Cibotium menziesii	14	0	0	native	NA	1	39.3	13
Hawai'i Island	13	Zimmerman	1017.88	-154.91	19.444	2003	1	7835	Cibotium menziesii	14	0	0	native	NA	1	39.3	15
Hawai'i Island	13	Zimmerman	1017.88	-154.91	19.444	2003	1	7839	Cibotium menziesii	14	0	0	native	NA	1	39.3	12
Hawai'i Island	13	Zimmerman	1017.88	-154.91	19.444	2003	1	7848	Cibotium menziesii	14	0	0	native	NA	1	39.3	6.8
Hawai'i Island	13	Zimmerman	1017.88	-154.91	19.444	2003	1	7741	Cibotium menziesii	14	0	0	native	NA	1	39.3	17.3
Hawai'i Island	13	Zimmerman	1017.88	-154.91	19.444	2003	1	7742	Cibotium menziesii	14	0	0	native	NA	1	39.3	9.1
Hawai'i Island	13	Zimmerman	1017.88	-154.91	19.444	2003	1	7778	Cibotium menziesii	14	0	0	native	NA	1	39.3	9.5
Hawai'i Island	13	Zimmerman	1017.88	-154.91	19.444	2003	1	7828	Cibotium menziesii	14	0	0	native	NA	1	39.3	8
Hawai'i Island	13	Zimmerman	1017.88	-154.91	19.444	2003	1	7845	Cibotium menziesii	14	0	0	native	NA	1	39.3	12
Hawai'i Island	13	Zimmerman	1017.88	-154.91	19.444	2003	1	7777	Cibotium menziesii	14	0	0	native	NA	1	39.3	14
Hawai'i Island	13	Zimmerman	1017.88	-154.91	19.444	2003	1	7798	Cibotium menziesii	14	0	0	native	NA	1	39.3	10.5
Hawai'i Island	13	Zimmerman	1017.88	-154.91	19.444	2003	1	7726	Cibotium menziesii	14	0	0	native	NA	1	39.3	9.5
Hawai'i Island	13	Zimmerman	1017.88	-154.91	19.444	2003	1	7831	Cibotium menziesii	14	0	0	native	NA	1	39.3	15.5
Hawai'i Island	13	Zimmerman	1017.88	-154.91	19.444	2003	1	7796	Cibotium menziesii	14	0	0	native	NA	1	39.3	18.5
Hawai'i Island	13	Zimmerman	1017.88	-154.91	19.444	2003	1	7789	Cibotium menziesii	14	0	0	native	NA	1	39.3	12.5
Hawai'i Island	13	Zimmerman	1017.88	-154.91	19.444	2003	1	7751	Diospyros sandwicensis	21	1	0	native	NA	1	9.82	33
Hawai'i Island	13	Zimmerman	1017.88	-154.91	19.444	2003	1	7720	Metrosideros polymorpha	34	1	0	native	NA	1	9.82	51.3
Hawai'i Island	13	Zimmerman	1017.88	-154.91	19.444	2003	1	7721	Metrosideros polymorpha	34	1	0	native	NA	1	9.82	58.3
Hawai'i Island	13	Zimmerman	1017.88	-154.91	19.444	2003	1	7722	Metrosideros polymorpha	34	1	0	native	NA	1	9.82	41.1
Hawai'i Island	13	Zimmerman	1017.88	-154.91	19.444	2003	1	7727	Metrosideros polymorpha	34	1	0	native	NA	1	9.82	45.5
Hawai'i Island	13	Zimmerman	1017.88	-154.91	19.444	2003	1	7728	Metrosideros polymorpha	34	1	0	native	NA	1	9.82	43.7
Hawai'i Island	13	Zimmerman	1017.88	-154.91	19.444	2003	1	7730	Metrosideros polymorpha	34	1	0	native	NA	1	9.82	37
Hawai'i Island	13	Zimmerman	1017.88	-154.91	19.444	2003	1	7737	Metrosideros polymorpha	34	1	0	native	NA	1	9.82	44.2
Hawai'i Island	13	Zimmerman	1017.88	-154.91	19.444	2003	1	7739	Metrosideros polymorpha	34	1	0	native	NA	1	39.3	24.7
Hawai'i Island	13	Zimmerman	1017.88	-154.91	19.444	2003	1	7752	Metrosideros polymorpha	34	1	0	native	NA	1	9.82	31.4
Hawai'i Island	13	Zimmerman	1017.88	-154.91	19.444	2003	1	7758	Metrosideros polymorpha	34	1	0	native	NA	1	9.82	47.1
Hawai'i Island	13	Zimmerman	1017.88	-154.91	19.444	2003	1	7779	Metrosideros polymorpha	34	1	0	native	NA	1	9.82	62.1
Hawai'i Island	13	Zimmerman	1017.88	-154.91	19.444	2003	1	7781	Metrosideros polymorpha	34	1	0	native	NA	1	9.82	51
Hawai'i Island	13	Zimmerman	1017.88	-154.91	19.444	2003	1	7782	Metrosideros polymorpha	34	1	0	native	NA	1	9.82	41.1
Hawai'i Island	13	Zimmerman	1017.88	-154.91	19.444	2003	1	7785	Metrosideros polymorpha	34	1	0	native	NA	1	9.82	74.3
Hawai'i Island	13	Zimmerman	1017.88	-154.91	19.444	2003	1	7793	Metrosideros polymorpha	34	1	0	native	NA	1	39.3	25.3
Hawai'i Island	13	Zimmerman	1017.88	-154.91	19.444	2003	1	7794	Metrosideros polymorpha	34	1	0	native	NA	1	9.82	30.5
Hawai'i Island	13	Zimmerman	1017.88	-154.91	19.444	2003	1	7809	Metrosideros polymorpha	34	1	0	native	NA	1	9.82	47.4
Hawai'i Island	13	Zimmerman	1017.88	-154.91	19.444	2003	1	7819	Metrosideros polymorpha	34	1	0	native	NA	1	9.82	30.1
Hawai'i Island	13	Zimmerman	1017.88	-154.91	19.444	2003	1	7823	Metrosideros polymorpha	34	1	0	native	NA	1	9.82	47.4
Hawai'i Island	13	Zimmerman	1017.88	-154.91	19.444	2003	1	7837	Metrosideros polymorpha	34	1	0	native	NA	1	9.82	43.8
Hawai'i Island	13	Zimmerman	1017.88	-154.91	19.444	2003	1	7847	Metrosideros polymorpha	34	1	0	native	NA	1	9.82	41.7
Hawai'i Island	13	Zimmerman	1017.88	-154.91	19.444	2003	1	7849	Metrosideros polymorpha	34	1	0	native	NA	1	9.82	51.3
Hawai'i Island	13	Zimmerman	1017.88	-154.91	19.444	2003	1	7855	Metrosideros polymorpha	34	1	0	native	NA	1	9.82	43.5
Hawai'i Island	13	Zimmerman	1017.88	-154.91	19.444	2003	1	7856	Metrosideros polymorpha	34	1	0	native	NA	1	9.82	35.3
Hawai'i Island	13	Zimmerman	1017.88	-154.91	19.444	2003	1	7841	Psidium cattleianum	34	1	0	alien	1	1	39.3	5.4
Hawai'i Island	13	Zimmerman	1017.88	-154.91	19.444	2003	1	7822	Psidium cattleianum	34	1	0	alien	1	1	39.3	11
Hawai'i Island	13	Zimmerman	1017.88	-154.91	19.444	2003	1	7792	Psidium cattleianum	34	1	0	alien	1	1	39.3	9.1
Hawai'i Island	13	Zimmerman	1017.88	-154.91	19.444	2003	1	7813	Psidium cattleianum	34	1	0	alien	1	1	39.3	6.8
Hawai'i Island	13	Zimmerman	1017.88	-154.91	19.444	2003	1	7826	Psidium cattleianum	34	1	0	alien	1	1	39.3	17
Hawai'i Island	13	Zimmerman	1017.88	-154.91	19.444	2003	1	7818	Psidium cattleianum	34	1	0	alien	1	1	39.3	8
Hawai'i Island	13	Zimmerman	1017.88	-154.91	19.444	2003	1	7838	Psidium cattleianum	34	1	0	alien	1	1	39.3	5.3
Hawai'i Island	13	Zimmerman	1017.88	-154.91	19.444	2003	1	7784	Psidium cattleianum	34	1	0	alien	1	1	39.3	9.8
Hawai'i Island	13	Zimmerman	1017.88	-154.91	19.444	2003	1	7827	Psidium cattleianum	34	1	0	alien	1	1	39.3	6.8
Hawai'i Island	13	Zimmerman	1017.88	-154.91	19.444	2003	1	7790	Psidium cattleianum	34	1	0	alien	1	1	39.3	6.8
Hawai'i Island	13	Zimmerman	1017.88	-154.91	19.444	2003	1	7824	Psidium cattleianum	34	1	0	alien	1	1	39.3	8.7
Hawai'i Island	13	Zimmerman	1017.88	-154.91	19.444	2003	1	7851	Psidium cattleianum	34	1	0	alien	1	1	39.3	8.3
Hawai'i Island	13	Zimmerman	1017.88	-154.91	19.444	2003	1	7788	Psidium cattleianum	34	1	0	alien	1	1	39.3	10
Hawai'i Island	13	Zimmerman	1017.88	-154.91	19.444	2003	1	7780	Psidium cattleianum	34	1	0	alien	1	1	39.3	10.3
Hawai'i Island	13	Zimmerman	1017.88	-154.91	19.444	2003	1	7814	Psidium cattleianum	34	1	0	alien	1	1	39.3	8
Hawai'i Island	13	Zimmerman	1017.88	-154.91	19.444	2003	1	7834	Psidium cattleianum	34	1	0	alien	1	1	39.3	12.2
Hawai'i Island	13	Zimmerman	1017.88	-154.91	19.444	2003	1	7800	Psidium cattleianum	34	1	0	alien	1	1	39.3	6
Hawai'i Island	13	Zimmerman	1017.88	-154.91	19.444	2003	1	7830	Psidium cattleianum	34	1	0	alien	1	1	39.3	5.5
Hawai'i Island	13	Zimmerman	1017.88	-154.91	19.444	2003	1	7844	Psidium cattleianum	34	1	0	alien	1	1	39.3	10.6
Hawai'i Island	13	Zimmerman	1017.88	-154.91	19.444	2003	1	7744	Psidium cattleianum	34	1	0	alien	1	1	39.3	9.5
Hawai'i Island	13	Zimmerman	1017.88	-154.91	19.444	2003	1	7821	Psidium cattleianum	34	1	0	alien	1	1	39.3	8.7
Hawai'i Island	13	Zimmerman	1017.88	-154.91	19.444	2003	1	7802	Psidium cattleianum	34	1	0	alien	1	1	39.3	5
Hawai'i Island	13	Zimmerman	1017.88	-154.91	19.444	2003	1	7745	Psidium cattleianum	34	1	0	alien	1	1	39.3	10.4
Hawai'i Island	13	Zimmerman	1017.88	-154.91	19.444	2003	1	7803	Psidium cattleianum	34	1	0	alien	1	1	39.3	6.9
Hawai'i Island	13	Zimmerman	1017.88	-154.91	19.444	2003	1	7791	Psidium cattleianum	34	1	0	alien	1	1	39.3	7.3
Hawai'i Island	13	Zimmerman	1017.88	-154.91	19.444	2003	1	7762	Psidium cattleianum	34	1	0	alien	1	1	39.3	9.6
Hawai'i Island	13	Zimmerman	1017.88	-154.91	19.444	2003	1	7743	Psidium cattleianum	34	1	0	alien	1	1	39.3	11.7
Hawai'i Island	13	Zimmerman	1017.88	-154.91	19.444	2003	1	7805	Psidium cattleianum	34	1	0	alien	1	1	39.3	5.4
Hawai'i Island	13	Zimmerman	1017.88	-154.91	19.444	2003	1	7771	Psidium cattleianum	34	1	0	alien	1	1	39.3	9.5
Hawai'i Island	13	Zimmerman	1017.88	-154.91	19.444	2003	1	7733	Psidium cattleianum	34	1	0	alien	1	1	39.3	6.6
Hawai'i Island	13	Zimmerman	1017.88	-154.91	19.444	2003	1	7766	Psidium cattleianum	34	1	0	alien	1	1	39.3	5.5
Hawai'i Island	13	Zimmerman	1017.88	-154.91	19.444	2003	1	7770	Psidium cattleianum	34	1	0	alien	1	1	39.3	7.2
Hawai'i Island	13	Zimmerman	1017.88	-154.91	19.444	2003	1	7761	Psidium cattleianum	34	1	0	alien	1	1	39.3	13.4
Hawai'i Island	13	Zimmerman	1017.88	-154.91	19.444	2003	1	7772	Psidium cattleianum	34	1	0	alien	1	1	39.3	8.2
Hawai'i Island	13	Zimmerman	1017.88	-154.91	19.444	2003	1	7748	Psidium cattleianum	34	1	0	alien	1	1	39.3	5.1
Hawai'i Island	13	Zimmerman	1017.88	-154.91	19.444	2003	1	7753	Psidium cattleianum	34	1	0	alien	1	1	39.3	21.2
Hawai'i Island	13	Zimmerman	1017.88	-154.91	19.444	2003	1	7738	Psidium cattleianum	34	1	0	alien	1	1	39.3	8.3
Hawai'i Island	13	Zimmerman	1017.88	-154.91	19.444	2003	1	7774	Psidium cattleianum	34	1	0	alien	1	1	39.3	5.5
Hawai'i Island	13	Zimmerman	1017.88	-154.91	19.444	2003	1	7769	Psidium cattleianum	34	1	0	alien	1	1	39.3	5.8
Hawai'i Island	13	Zimmerman	1017.88	-154.91	19.444	2003	1	7773	Psidium cattleianum	34	1	0	alien	1	1	39.3	12
Hawai'i Island	13	Zimmerman	1017.88	-154.91	19.444	2003	1	7760	Psidium cattleianum	34	1	0	alien	1	1	39.3	7.1
Hawai'i Island	13	Zimmerman	1017.88	-154.91	19.444	2003	1	7755	Psidium cattleianum	34	1	0	alien	1	1	39.3	6.5
Hawai'i Island	13	Zimmerman	1017.88	-154.91	19.444	2003	1	7759	Psidium cattleianum	34	1	0	alien	1	1	39.3	5.7
Hawai'i Island	13	Zimmerman	1017.88	-154.91	19.444	2003	1	7723	Psidium cattleianum	34	1	0	alien	1	1	39.3	8.5
Hawai'i Island	13	Zimmerman	1017.88	-154.91	19.444	2003	1	7746	Psychotria spp.	47	1	0	native	NA	1	39.3	8.8
Hawai'i Island	13	Zimmerman	1017.88	-154.91	19.444	2003	1	7731	Polyscias hawaiensis	6	1	0	native	NA	1	9.82	60.9
Hawai'i Island	14	Zimmerman	1017.88	-154.91	19.444	2003	1	7880	Melastoma malabathricum	30	1	0	alien	1	1	39.3	5.5
Hawai'i Island	14	Zimmerman	1017.88	-154.91	19.444	2003	1	7903	Melastoma malabathricum	30	1	0	alien	1	1	39.3	5.6
Hawai'i Island	14	Zimmerman	1017.88	-154.91	19.444	2003	1	7913	Melastoma malabathricum	30	1	0	alien	1	1	39.3	5.5
Hawai'i Island	14	Zimmerman	1017.88	-154.91	19.444	2003	1	7872	Metrosideros polymorpha	34	1	0	native	NA	1	39.3	10.1
Hawai'i Island	14	Zimmerman	1017.88	-154.91	19.444	2003	1	7858	Metrosideros polymorpha	34	1	0	native	NA	1	39.3	6.7
Hawai'i Island	14	Zimmerman	1017.88	-154.91	19.444	2003	1	7859	Metrosideros polymorpha	34	1	0	native	NA	1	39.3	9.4
Hawai'i Island	14	Zimmerman	1017.88	-154.91	19.444	2003	1	7862	Metrosideros polymorpha	34	1	0	native	NA	1	39.3	6.6
Hawai'i Island	14	Zimmerman	1017.88	-154.91	19.444	2003	1	7866	Metrosideros polymorpha	34	1	0	native	NA	1	39.3	10.5
Hawai'i Island	14	Zimmerman	1017.88	-154.91	19.444	2003	1	7867	Metrosideros polymorpha	34	1	0	native	NA	1	39.3	8.6
Hawai'i Island	14	Zimmerman	1017.88	-154.91	19.444	2003	1	7882	Metrosideros polymorpha	34	1	0	native	NA	1	39.3	11.4
Hawai'i Island	14	Zimmerman	1017.88	-154.91	19.444	2003	1	7883	Metrosideros polymorpha	34	1	0	native	NA	1	39.3	6.8
Hawai'i Island	14	Zimmerman	1017.88	-154.91	19.444	2003	1	7886	Metrosideros polymorpha	34	1	0	native	NA	1	39.3	7.1
Hawai'i Island	14	Zimmerman	1017.88	-154.91	19.444	2003	1	7888	Metrosideros polymorpha	34	1	0	native	NA	1	39.3	10.4
Hawai'i Island	14	Zimmerman	1017.88	-154.91	19.444	2003	1	7891	Metrosideros polymorpha	34	1	0	native	NA	1	39.3	6.1
Hawai'i Island	14	Zimmerman	1017.88	-154.91	19.444	2003	1	7896	Metrosideros polymorpha	34	1	0	native	NA	1	39.3	9
Hawai'i Island	14	Zimmerman	1017.88	-154.91	19.444	2003	1	7897	Metrosideros polymorpha	34	1	0	native	NA	1	39.3	9.3
Hawai'i Island	14	Zimmerman	1017.88	-154.91	19.444	2003	1	7899	Metrosideros polymorpha	34	1	0	native	NA	1	39.3	10.7
Hawai'i Island	14	Zimmerman	1017.88	-154.91	19.444	2003	1	7900	Metrosideros polymorpha	34	1	0	native	NA	1	39.3	18
Hawai'i Island	14	Zimmerman	1017.88	-154.91	19.444	2003	1	7902	Metrosideros polymorpha	34	1	0	native	NA	1	39.3	12.4
Hawai'i Island	14	Zimmerman	1017.88	-154.91	19.444	2003	1	7904	Metrosideros polymorpha	34	1	0	native	NA	1	39.3	5.2
Hawai'i Island	14	Zimmerman	1017.88	-154.91	19.444	2003	1	7905	Metrosideros polymorpha	34	1	0	native	NA	1	39.3	5.2
Hawai'i Island	14	Zimmerman	1017.88	-154.91	19.444	2003	1	7906	Metrosideros polymorpha	34	1	0	native	NA	1	39.3	13.5
Hawai'i Island	14	Zimmerman	1017.88	-154.91	19.444	2003	1	7908	Metrosideros polymorpha	34	1	0	native	NA	1	39.3	5.2
Hawai'i Island	14	Zimmerman	1017.88	-154.91	19.444	2003	1	7909	Metrosideros polymorpha	34	1	0	native	NA	1	39.3	8.7
Hawai'i Island	14	Zimmerman	1017.88	-154.91	19.444	2003	1	7912	Metrosideros polymorpha	34	1	0	native	NA	1	39.3	22.6
Hawai'i Island	16	Knight_Barton	1000	-155.185	19.327	2012	1	10674	Dodonaea viscosa	51	1	0	native	NA	1	10	6.8
Hawai'i Island	16	Knight_Barton	1000	-155.185	19.327	2012	1	10696	Dodonaea viscosa	51	1	0	native	NA	1	10	5.4
Hawai'i Island	16	Knight_Barton	1000	-155.185	19.327	2012	1	11076	Dodonaea viscosa	51	1	0	native	NA	1	10	5.7
Hawai'i Island	16	Knight_Barton	1000	-155.185	19.327	2012	1	10807	Dodonaea viscosa	51	1	0	native	NA	1	10	5.2
Hawai'i Island	16	Knight_Barton	1000	-155.185	19.327	2012	1	10793	Dodonaea viscosa	51	1	0	native	NA	1	10	5.5
Hawai'i Island	16	Knight_Barton	1000	-155.185	19.327	2012	1	10730	Dodonaea viscosa	51	1	0	native	NA	1	10	5
Hawai'i Island	16	Knight_Barton	1000	-155.185	19.327	2012	1	10648	Metrosideros polymorpha	34	1	0	native	NA	1	10	10.9
Hawai'i Island	16	Knight_Barton	1000	-155.185	19.327	2012	1	10729	Metrosideros polymorpha	34	1	0	native	NA	1	10	15.2
Hawai'i Island	16	Knight_Barton	1000	-155.185	19.327	2012	1	10813	Metrosideros polymorpha	34	1	0	native	NA	1	10	12.2
Hawai'i Island	16	Knight_Barton	1000	-155.185	19.327	2012	1	10845	Metrosideros polymorpha	34	1	0	native	NA	1	10	8
Hawai'i Island	16	Knight_Barton	1000	-155.185	19.327	2012	1	10856	Metrosideros polymorpha	34	1	0	native	NA	1	10	7.9
Hawai'i Island	16	Knight_Barton	1000	-155.185	19.327	2012	1	10914	Metrosideros polymorpha	34	1	0	native	NA	1	10	9.4
Hawai'i Island	16	Knight_Barton	1000	-155.185	19.327	2012	1	10953	Metrosideros polymorpha	34	1	0	native	NA	1	10	24.8
Hawai'i Island	16	Knight_Barton	1000	-155.185	19.327	2012	1	11057	Metrosideros polymorpha	34	1	0	native	NA	1	10	15.4
Hawai'i Island	16	Knight_Barton	1000	-155.185	19.327	2012	1	10587	Metrosideros polymorpha	34	1	0	native	NA	1	10	13.9
Hawai'i Island	16	Knight_Barton	1000	-155.185	19.327	2012	1	10604	Metrosideros polymorpha	34	1	0	native	NA	1	10	14.2
Hawai'i Island	16	Knight_Barton	1000	-155.185	19.327	2012	1	10622	Metrosideros polymorpha	34	1	0	native	NA	1	10	27.8
Hawai'i Island	16	Knight_Barton	1000	-155.185	19.327	2012	1	10627	Metrosideros polymorpha	34	1	0	native	NA	1	10	8.5
Hawai'i Island	16	Knight_Barton	1000	-155.185	19.327	2012	1	10642	Metrosideros polymorpha	34	1	0	native	NA	1	10	13.8
Hawai'i Island	16	Knight_Barton	1000	-155.185	19.327	2012	1	10646	Metrosideros polymorpha	34	1	0	native	NA	1	10	20
Hawai'i Island	16	Knight_Barton	1000	-155.185	19.327	2012	1	10649	Metrosideros polymorpha	34	1	0	native	NA	1	10	10.9
Hawai'i Island	16	Knight_Barton	1000	-155.185	19.327	2012	1	10663	Metrosideros polymorpha	34	1	0	native	NA	1	10	7.4
Hawai'i Island	16	Knight_Barton	1000	-155.185	19.327	2012	1	10678	Metrosideros polymorpha	34	1	0	native	NA	1	10	9.7
Hawai'i Island	16	Knight_Barton	1000	-155.185	19.327	2012	1	10682	Metrosideros polymorpha	34	1	0	native	NA	1	10	15.4
Hawai'i Island	16	Knight_Barton	1000	-155.185	19.327	2012	1	10687	Metrosideros polymorpha	34	1	0	native	NA	1	10	8.2
Hawai'i Island	16	Knight_Barton	1000	-155.185	19.327	2012	1	10707	Metrosideros polymorpha	34	1	0	native	NA	1	10	8.7
Hawai'i Island	16	Knight_Barton	1000	-155.185	19.327	2012	1	10715	Metrosideros polymorpha	34	1	0	native	NA	1	10	15.2
Hawai'i Island	16	Knight_Barton	1000	-155.185	19.327	2012	1	10716	Metrosideros polymorpha	34	1	0	native	NA	1	10	7.5
Hawai'i Island	16	Knight_Barton	1000	-155.185	19.327	2012	1	10720	Metrosideros polymorpha	34	1	0	native	NA	1	10	10.4
Hawai'i Island	16	Knight_Barton	1000	-155.185	19.327	2012	1	10726	Metrosideros polymorpha	34	1	0	native	NA	1	10	7
Hawai'i Island	16	Knight_Barton	1000	-155.185	19.327	2012	1	10728	Metrosideros polymorpha	34	1	0	native	NA	1	10	20.8
Hawai'i Island	16	Knight_Barton	1000	-155.185	19.327	2012	1	10816	Metrosideros polymorpha	34	1	0	native	NA	1	10	15.8
Hawai'i Island	16	Knight_Barton	1000	-155.185	19.327	2012	1	10830	Metrosideros polymorpha	34	1	0	native	NA	1	10	15.4
Hawai'i Island	16	Knight_Barton	1000	-155.185	19.327	2012	1	10870	Metrosideros polymorpha	34	1	0	native	NA	1	10	16.5
Hawai'i Island	16	Knight_Barton	1000	-155.185	19.327	2012	1	10872	Metrosideros polymorpha	34	1	0	native	NA	1	10	13.4
Hawai'i Island	16	Knight_Barton	1000	-155.185	19.327	2012	1	10886	Metrosideros polymorpha	34	1	0	native	NA	1	10	8.2
Hawai'i Island	16	Knight_Barton	1000	-155.185	19.327	2012	1	10913	Metrosideros polymorpha	34	1	0	native	NA	1	10	17.9
Hawai'i Island	16	Knight_Barton	1000	-155.185	19.327	2012	1	10916	Metrosideros polymorpha	34	1	0	native	NA	1	10	20.1
Hawai'i Island	16	Knight_Barton	1000	-155.185	19.327	2012	1	10919	Metrosideros polymorpha	34	1	0	native	NA	1	10	13.6
Hawai'i Island	16	Knight_Barton	1000	-155.185	19.327	2012	1	10924	Metrosideros polymorpha	34	1	0	native	NA	1	10	9
Hawai'i Island	16	Knight_Barton	1000	-155.185	19.327	2012	1	10925	Metrosideros polymorpha	34	1	0	native	NA	1	10	8.2
Hawai'i Island	16	Knight_Barton	1000	-155.185	19.327	2012	1	10933	Metrosideros polymorpha	34	1	0	native	NA	1	10	7.4
Hawai'i Island	16	Knight_Barton	1000	-155.185	19.327	2012	1	10937	Metrosideros polymorpha	34	1	0	native	NA	1	10	13.5
Hawai'i Island	16	Knight_Barton	1000	-155.185	19.327	2012	1	10950	Metrosideros polymorpha	34	1	0	native	NA	1	10	6
Hawai'i Island	16	Knight_Barton	1000	-155.185	19.327	2012	1	10955	Metrosideros polymorpha	34	1	0	native	NA	1	10	12.5
Hawai'i Island	16	Knight_Barton	1000	-155.185	19.327	2012	1	10959	Metrosideros polymorpha	34	1	0	native	NA	1	10	12
Hawai'i Island	16	Knight_Barton	1000	-155.185	19.327	2012	1	10960	Metrosideros polymorpha	34	1	0	native	NA	1	10	12.5
Hawai'i Island	16	Knight_Barton	1000	-155.185	19.327	2012	1	10966	Metrosideros polymorpha	34	1	0	native	NA	1	10	5
Hawai'i Island	16	Knight_Barton	1000	-155.185	19.327	2012	1	10976	Metrosideros polymorpha	34	1	0	native	NA	1	10	9
Hawai'i Island	16	Knight_Barton	1000	-155.185	19.327	2012	1	11024	Metrosideros polymorpha	34	1	0	native	NA	1	10	9
Hawai'i Island	16	Knight_Barton	1000	-155.185	19.327	2012	1	11051	Metrosideros polymorpha	34	1	0	native	NA	1	10	9.3
Hawai'i Island	16	Knight_Barton	1000	-155.185	19.327	2012	1	11052	Metrosideros polymorpha	34	1	0	native	NA	1	10	18.8
Hawai'i Island	16	Knight_Barton	1000	-155.185	19.327	2012	1	11054	Metrosideros polymorpha	34	1	0	native	NA	1	10	13
Hawai'i Island	16	Knight_Barton	1000	-155.185	19.327	2012	1	11064	Metrosideros polymorpha	34	1	0	native	NA	1	10	14
Hawai'i Island	16	Knight_Barton	1000	-155.185	19.327	2012	1	10723	Osteomeles anthyllidifolia	46	1	0	native	NA	1	10	6.2
Hawai'i Island	16	Knight_Barton	1000	-155.185	19.327	2012	1	10736	Osteomeles anthyllidifolia	46	1	0	native	NA	1	10	5
Hawai'i Island	16	Knight_Barton	1000	-155.185	19.327	2012	1	10628	Styphelia tameiameiae	22	1	0	native	NA	1	10	5.4
Hawai'i Island	16	Knight_Barton	1000	-155.185	19.327	2012	1	10904	Styphelia tameiameiae	22	1	0	native	NA	1	10	6
Hawai'i Island	16	Knight_Barton	1000	-155.185	19.327	2012	1	10892	Styphelia tameiameiae	22	1	0	native	NA	1	10	5.6
Hawai'i Island	16	Knight_Barton	1000	-155.185	19.327	2012	1	10949	Styphelia tameiameiae	22	1	0	native	NA	1	10	6.1
Hawai'i Island	16	Knight_Barton	1000	-155.185	19.327	2012	1	10939	Styphelia tameiameiae	22	1	0	native	NA	1	10	5.2
Hawai'i Island	16	Knight_Barton	1000	-155.185	19.327	2012	1	10698	Styphelia tameiameiae	22	1	0	native	NA	1	10	6
Hawai'i Island	16	Knight_Barton	1000	-155.185	19.327	2012	1	10934	Styphelia tameiameiae	22	1	0	native	NA	1	10	5
Hawai'i Island	16	Knight_Barton	1000	-155.185	19.327	2012	1	10672	Styphelia tameiameiae	22	1	0	native	NA	1	10	9
Hawai'i Island	16	Knight_Barton	1000	-155.185	19.327	2012	1	10901	Styphelia tameiameiae	22	1	0	native	NA	1	10	5.2
Hawai'i Island	16	Knight_Barton	1000	-155.185	19.327	2012	1	10884	Styphelia tameiameiae	22	1	0	native	NA	1	10	5.2
Hawai'i Island	16	Knight_Barton	1000	-155.185	19.327	2012	1	10964	Styphelia tameiameiae	22	1	0	native	NA	1	10	5
Hawai'i Island	16	Knight_Barton	1000	-155.185	19.327	2012	1	10786	Styphelia tameiameiae	22	1	0	native	NA	1	10	6.3
Hawai'i Island	16	Knight_Barton	1000	-155.185	19.327	2012	1	11015	Styphelia tameiameiae	22	1	0	native	NA	1	10	8
Hawai'i Island	16	Knight_Barton	1000	-155.185	19.327	2012	1	10629	Styphelia tameiameiae	22	1	0	native	NA	1	10	8.3
Hawai'i Island	16	Knight_Barton	1000	-155.185	19.327	2012	1	10818	Styphelia tameiameiae	22	1	0	native	NA	1	10	5
Hawai'i Island	16	Knight_Barton	1000	-155.185	19.327	2012	1	10865	Styphelia tameiameiae	22	1	0	native	NA	1	10	11.1
Hawai'i Island	16	Knight_Barton	1000	-155.185	19.327	2012	1	10630	Styphelia tameiameiae	22	1	0	native	NA	1	10	6.8
Hawai'i Island	16	Knight_Barton	1000	-155.185	19.327	2012	1	10838	Styphelia tameiameiae	22	1	0	native	NA	1	10	5.3
Hawai'i Island	16	Knight_Barton	1000	-155.185	19.327	2012	1	10796	Styphelia tameiameiae	22	1	0	native	NA	1	10	6.8
Hawai'i Island	16	Knight_Barton	1000	-155.185	19.327	2012	1	10790	Styphelia tameiameiae	22	1	0	native	NA	1	10	5
Hawai'i Island	16	Knight_Barton	1000	-155.185	19.327	2012	1	11031	Styphelia tameiameiae	22	1	0	native	NA	1	10	5.2
Hawai'i Island	16	Knight_Barton	1000	-155.185	19.327	2012	1	10732	Styphelia tameiameiae	22	1	0	native	NA	1	10	8
Hawai'i Island	16	Knight_Barton	1000	-155.185	19.327	2012	1	10965	Styphelia tameiameiae	22	1	0	native	NA	1	10	6
Hawai'i Island	16	Knight_Barton	1000	-155.185	19.327	2012	1	10754	Styphelia tameiameiae	22	1	0	native	NA	1	10	5
Hawai'i Island	16	Knight_Barton	1000	-155.185	19.327	2012	1	11042	Styphelia tameiameiae	22	1	0	native	NA	1	10	6
Hawai'i Island	16	Knight_Barton	1000	-155.185	19.327	2012	1	10994	Styphelia tameiameiae	22	1	0	native	NA	1	10	6
Hawai'i Island	16	Knight_Barton	1000	-155.185	19.327	2012	1	10824	Styphelia tameiameiae	22	1	0	native	NA	1	10	5.2
Hawai'i Island	16	Knight_Barton	1000	-155.185	19.327	2012	1	11027	Styphelia tameiameiae	22	1	0	native	NA	1	10	5.4
Hawai'i Island	16	Knight_Barton	1000	-155.185	19.327	2012	1	11050	Styphelia tameiameiae	22	1	0	native	NA	1	10	7.4
Hawai'i Island	16	Knight_Barton	1000	-155.185	19.327	2012	1	10967	Styphelia tameiameiae	22	1	0	native	NA	1	10	5.4
Hawai'i Island	16	Knight_Barton	1000	-155.185	19.327	2012	1	11002	Styphelia tameiameiae	22	1	0	native	NA	1	10	6
Hawai'i Island	16	Knight_Barton	1000	-155.185	19.327	2012	1	10977	Styphelia tameiameiae	22	1	0	native	NA	1	10	6.5
Hawai'i Island	16	Knight_Barton	1000	-155.185	19.327	2012	1	10785	Styphelia tameiameiae	22	1	0	native	NA	1	10	6.3
Hawai'i Island	16	Knight_Barton	1000	-155.185	19.327	2012	1	10713	Styphelia tameiameiae	22	1	0	native	NA	1	10	5
Hawai'i Island	16	Knight_Barton	1000	-155.185	19.327	2012	1	10737	Styphelia tameiameiae	22	1	0	native	NA	1	10	7.2
Hawai'i Island	17	Knight_Barton	1000	-155.183	19.327	2012	1	10241	Dodonaea viscosa	51	1	0	native	NA	1	10	6.5
Hawai'i Island	17	Knight_Barton	1000	-155.183	19.327	2012	1	10303	Dodonaea viscosa	51	1	0	native	NA	1	10	6
Hawai'i Island	17	Knight_Barton	1000	-155.183	19.327	2012	1	10354	Metrosideros polymorpha	34	1	0	native	NA	1	10	11.5
Hawai'i Island	17	Knight_Barton	1000	-155.183	19.327	2012	1	10385	Metrosideros polymorpha	34	1	0	native	NA	1	10	9.2
Hawai'i Island	17	Knight_Barton	1000	-155.183	19.327	2012	1	10386	Metrosideros polymorpha	34	1	0	native	NA	1	10	20.1
Hawai'i Island	17	Knight_Barton	1000	-155.183	19.327	2012	1	10426	Metrosideros polymorpha	34	1	0	native	NA	1	10	6.4
Hawai'i Island	17	Knight_Barton	1000	-155.183	19.327	2012	1	10456	Metrosideros polymorpha	34	1	0	native	NA	1	10	33.4
Hawai'i Island	17	Knight_Barton	1000	-155.183	19.327	2012	1	10468	Metrosideros polymorpha	34	1	0	native	NA	1	10	8
Hawai'i Island	17	Knight_Barton	1000	-155.183	19.327	2012	1	10472	Metrosideros polymorpha	34	1	0	native	NA	1	10	13.5
Hawai'i Island	17	Knight_Barton	1000	-155.183	19.327	2012	1	10476	Metrosideros polymorpha	34	1	0	native	NA	1	10	18
Hawai'i Island	17	Knight_Barton	1000	-155.183	19.327	2012	1	10538	Metrosideros polymorpha	34	1	0	native	NA	1	10	15
Hawai'i Island	17	Knight_Barton	1000	-155.183	19.327	2012	1	10231	Metrosideros polymorpha	34	1	0	native	NA	1	10	9.5
Hawai'i Island	17	Knight_Barton	1000	-155.183	19.327	2012	1	10249	Metrosideros polymorpha	34	1	0	native	NA	1	10	7.5
Hawai'i Island	17	Knight_Barton	1000	-155.183	19.327	2012	1	10331	Metrosideros polymorpha	34	1	0	native	NA	1	10	10
Hawai'i Island	17	Knight_Barton	1000	-155.183	19.327	2012	1	10424	Metrosideros polymorpha	34	1	0	native	NA	1	10	21
Hawai'i Island	17	Knight_Barton	1000	-155.183	19.327	2012	1	10457	Metrosideros polymorpha	34	1	0	native	NA	1	10	15
Hawai'i Island	17	Knight_Barton	1000	-155.183	19.327	2012	1	10482	Metrosideros polymorpha	34	1	0	native	NA	1	10	18.7
Hawai'i Island	17	Knight_Barton	1000	-155.183	19.327	2012	1	10509	Metrosideros polymorpha	34	1	0	native	NA	1	10	24.5
Hawai'i Island	17	Knight_Barton	1000	-155.183	19.327	2012	1	10302	Myrica faya	33	1	0	alien	1	1	10	40
Hawai'i Island	17	Knight_Barton	1000	-155.183	19.327	2012	1	10311	Myrica faya	33	1	0	alien	1	1	10	35
Hawai'i Island	17	Knight_Barton	1000	-155.183	19.327	2012	1	10379	Myrica faya	33	1	0	alien	1	1	10	31
Hawai'i Island	17	Knight_Barton	1000	-155.183	19.327	2012	1	10265	Myrica faya	33	1	0	alien	1	1	10	6
Hawai'i Island	17	Knight_Barton	1000	-155.183	19.327	2012	1	10242	Myrica faya	33	1	0	alien	1	1	10	20
Hawai'i Island	17	Knight_Barton	1000	-155.183	19.327	2012	1	10547	Myrica faya	33	1	0	alien	1	1	10	50
Hawai'i Island	17	Knight_Barton	1000	-155.183	19.327	2012	1	10510	Myrica faya	33	1	0	alien	1	1	10	50
Hawai'i Island	17	Knight_Barton	1000	-155.183	19.327	2012	1	10520	Myrica faya	33	1	0	alien	1	1	10	35
Hawai'i Island	17	Knight_Barton	1000	-155.183	19.327	2012	1	10573	Myrica faya	33	1	0	alien	1	1	10	30
Hawai'i Island	17	Knight_Barton	1000	-155.183	19.327	2012	1	10357	Osteomeles anthyllidifolia	46	1	0	native	NA	1	10	5
Hawai'i Island	17	Knight_Barton	1000	-155.183	19.327	2012	1	10344	Styphelia tameiameiae	22	1	0	native	NA	1	10	5.7
Hawai'i Island	17	Knight_Barton	1000	-155.183	19.327	2012	1	10324	Styphelia tameiameiae	22	1	0	native	NA	1	10	8
Hawai'i Island	17	Knight_Barton	1000	-155.183	19.327	2012	1	10287	Styphelia tameiameiae	22	1	0	native	NA	1	10	9.7
Hawai'i Island	17	Knight_Barton	1000	-155.183	19.327	2012	1	10346	Styphelia tameiameiae	22	1	0	native	NA	1	10	5.8
Hawai'i Island	17	Knight_Barton	1000	-155.183	19.327	2012	1	10294	Styphelia tameiameiae	22	1	0	native	NA	1	10	6
Hawai'i Island	17	Knight_Barton	1000	-155.183	19.327	2012	1	10339	Styphelia tameiameiae	22	1	0	native	NA	1	10	5.5
Hawai'i Island	17	Knight_Barton	1000	-155.183	19.327	2012	1	10371	Styphelia tameiameiae	22	1	0	native	NA	1	10	7.2
Hawai'i Island	17	Knight_Barton	1000	-155.183	19.327	2012	1	10349	Styphelia tameiameiae	22	1	0	native	NA	1	10	7.1
Hawai'i Island	17	Knight_Barton	1000	-155.183	19.327	2012	1	10318	Styphelia tameiameiae	22	1	0	native	NA	1	10	5
Hawai'i Island	17	Knight_Barton	1000	-155.183	19.327	2012	1	10290	Styphelia tameiameiae	22	1	0	native	NA	1	10	6
Hawai'i Island	17	Knight_Barton	1000	-155.183	19.327	2012	1	10325	Styphelia tameiameiae	22	1	0	native	NA	1	10	6
Hawai'i Island	17	Knight_Barton	1000	-155.183	19.327	2012	1	10370	Styphelia tameiameiae	22	1	0	native	NA	1	10	6.9
Hawai'i Island	17	Knight_Barton	1000	-155.183	19.327	2012	1	10485	Styphelia tameiameiae	22	1	0	native	NA	1	10	7.1
Hawai'i Island	17	Knight_Barton	1000	-155.183	19.327	2012	1	10337	Styphelia tameiameiae	22	1	0	native	NA	1	10	5.1
Hawai'i Island	17	Knight_Barton	1000	-155.183	19.327	2012	1	10381	Styphelia tameiameiae	22	1	0	native	NA	1	10	5.4
Hawai'i Island	17	Knight_Barton	1000	-155.183	19.327	2012	1	10366	Styphelia tameiameiae	22	1	0	native	NA	1	10	6
Hawai'i Island	17	Knight_Barton	1000	-155.183	19.327	2012	1	10362	Styphelia tameiameiae	22	1	0	native	NA	1	10	7.1
Hawai'i Island	17	Knight_Barton	1000	-155.183	19.327	2012	1	10384	Styphelia tameiameiae	22	1	0	native	NA	1	10	6.2
Hawai'i Island	17	Knight_Barton	1000	-155.183	19.327	2012	1	10359	Styphelia tameiameiae	22	1	0	native	NA	1	10	5.1
Hawai'i Island	17	Knight_Barton	1000	-155.183	19.327	2012	1	10278	Styphelia tameiameiae	22	1	0	native	NA	1	10	5
Hawai'i Island	17	Knight_Barton	1000	-155.183	19.327	2012	1	10567	Styphelia tameiameiae	22	1	0	native	NA	1	10	5.8
Hawai'i Island	17	Knight_Barton	1000	-155.183	19.327	2012	1	10463	Styphelia tameiameiae	22	1	0	native	NA	1	10	5
Hawai'i Island	17	Knight_Barton	1000	-155.183	19.327	2012	1	10279	Styphelia tameiameiae	22	1	0	native	NA	1	10	6.5
Hawai'i Island	17	Knight_Barton	1000	-155.183	19.327	2012	1	10560	Styphelia tameiameiae	22	1	0	native	NA	1	10	5.5
Hawai'i Island	17	Knight_Barton	1000	-155.183	19.327	2012	1	10275	Styphelia tameiameiae	22	1	0	native	NA	1	10	7
Hawai'i Island	17	Knight_Barton	1000	-155.183	19.327	2012	1	10553	Styphelia tameiameiae	22	1	0	native	NA	1	10	6.3
Hawai'i Island	17	Knight_Barton	1000	-155.183	19.327	2012	1	10444	Styphelia tameiameiae	22	1	0	native	NA	1	10	8
Hawai'i Island	17	Knight_Barton	1000	-155.183	19.327	2012	1	10452	Styphelia tameiameiae	22	1	0	native	NA	1	10	8
Hawai'i Island	17	Knight_Barton	1000	-155.183	19.327	2012	1	10551	Styphelia tameiameiae	22	1	0	native	NA	1	10	5.5
Hawai'i Island	17	Knight_Barton	1000	-155.183	19.327	2012	1	10289	Styphelia tameiameiae	22	1	0	native	NA	1	10	5.3
Hawai'i Island	17	Knight_Barton	1000	-155.183	19.327	2012	1	10568	Styphelia tameiameiae	22	1	0	native	NA	1	10	5.5
Hawai'i Island	17	Knight_Barton	1000	-155.183	19.327	2012	1	10563	Styphelia tameiameiae	22	1	0	native	NA	1	10	5.5
Hawai'i Island	17	Knight_Barton	1000	-155.183	19.327	2012	1	10400	Styphelia tameiameiae	22	1	0	native	NA	1	10	6.5
Hawai'i Island	17	Knight_Barton	1000	-155.183	19.327	2012	1	10461	Styphelia tameiameiae	22	1	0	native	NA	1	10	6.2
Hawai'i Island	17	Knight_Barton	1000	-155.183	19.327	2012	1	10512	Styphelia tameiameiae	22	1	0	native	NA	1	10	8.1
Hawai'i Island	17	Knight_Barton	1000	-155.183	19.327	2012	1	10491	Styphelia tameiameiae	22	1	0	native	NA	1	10	7.6
Hawai'i Island	17	Knight_Barton	1000	-155.183	19.327	2012	1	10584	Styphelia tameiameiae	22	1	0	native	NA	1	10	7.6
Hawai'i Island	17	Knight_Barton	1000	-155.183	19.327	2012	1	10447	Styphelia tameiameiae	22	1	0	native	NA	1	10	6
Hawai'i Island	17	Knight_Barton	1000	-155.183	19.327	2012	1	10229	Styphelia tameiameiae	22	1	0	native	NA	1	10	5.5
Hawai'i Island	17	Knight_Barton	1000	-155.183	19.327	2012	1	10410	Styphelia tameiameiae	22	1	0	native	NA	1	10	8.5
Hawai'i Island	17	Knight_Barton	1000	-155.183	19.327	2012	1	10582	Styphelia tameiameiae	22	1	0	native	NA	1	10	9.5
Hawai'i Island	17	Knight_Barton	1000	-155.183	19.327	2012	1	10541	Styphelia tameiameiae	22	1	0	native	NA	1	10	7
Hawai'i Island	17	Knight_Barton	1000	-155.183	19.327	2012	1	10445	Styphelia tameiameiae	22	1	0	native	NA	1	10	6
Hawai'i Island	17	Knight_Barton	1000	-155.183	19.327	2012	1	10395	Styphelia tameiameiae	22	1	0	native	NA	1	10	9
Hawai'i Island	17	Knight_Barton	1000	-155.183	19.327	2012	1	10236	Styphelia tameiameiae	22	1	0	native	NA	1	10	7
Hawai'i Island	17	Knight_Barton	1000	-155.183	19.327	2012	1	10571	Styphelia tameiameiae	22	1	0	native	NA	1	10	9.5
Hawai'i Island	17	Knight_Barton	1000	-155.183	19.327	2012	1	10243	Styphelia tameiameiae	22	1	0	native	NA	1	10	6
Hawai'i Island	17	Knight_Barton	1000	-155.183	19.327	2012	1	10240	Styphelia tameiameiae	22	1	0	native	NA	1	10	6.5
Hawai'i Island	17	Knight_Barton	1000	-155.183	19.327	2012	1	10537	Styphelia tameiameiae	22	1	0	native	NA	1	10	6.5
Hawai'i Island	17	Knight_Barton	1000	-155.183	19.327	2012	1	10535	Styphelia tameiameiae	22	1	0	native	NA	1	10	7
Hawai'i Island	17	Knight_Barton	1000	-155.183	19.327	2012	1	10504	Styphelia tameiameiae	22	1	0	native	NA	1	10	9
Hawai'i Island	17	Knight_Barton	1000	-155.183	19.327	2012	1	10578	Styphelia tameiameiae	22	1	0	native	NA	1	10	6.1
Hawai'i Island	17	Knight_Barton	1000	-155.183	19.327	2012	1	10517	Styphelia tameiameiae	22	1	0	native	NA	1	10	6
Hawai'i Island	17	Knight_Barton	1000	-155.183	19.327	2012	1	10251	Styphelia tameiameiae	22	1	0	native	NA	1	10	8.2
Hawai'i Island	17	Knight_Barton	1000	-155.183	19.327	2012	1	10226	Styphelia tameiameiae	22	1	0	native	NA	1	10	6
Hawai'i Island	17	Knight_Barton	1000	-155.183	19.327	2012	1	10522	Styphelia tameiameiae	22	1	0	native	NA	1	10	10
Hawai'i Island	17	Knight_Barton	1000	-155.183	19.327	2012	1	10514	Styphelia tameiameiae	22	1	0	native	NA	1	10	11
Hawai'i Island	17	Knight_Barton	1000	-155.183	19.327	2012	1	10234	Styphelia tameiameiae	22	1	0	native	NA	1	10	5
Hawai'i Island	17	Knight_Barton	1000	-155.183	19.327	2012	1	10531	Styphelia tameiameiae	22	1	0	native	NA	1	10	9
Hawai'i Island	17	Knight_Barton	1000	-155.183	19.327	2012	1	10429	Styphelia tameiameiae	22	1	0	native	NA	1	10	7.2
Hawai'i Island	17	Knight_Barton	1000	-155.183	19.327	2012	1	10534	Styphelia tameiameiae	22	1	0	native	NA	1	10	6.2
Hawai'i Island	17	Knight_Barton	1000	-155.183	19.327	2012	1	10496	Styphelia tameiameiae	22	1	0	native	NA	1	10	6.1
Hawai'i Island	17	Knight_Barton	1000	-155.183	19.327	2012	1	10505	Styphelia tameiameiae	22	1	0	native	NA	1	10	7.2
Hawai'i Island	18	Knight_Barton	1000	-155.252	19.403	2012	1	11860	Metrosideros polymorpha	34	1	0	native	NA	1	10	32.3
Hawai'i Island	18	Knight_Barton	1000	-155.252	19.403	2012	1	11861	Metrosideros polymorpha	34	1	0	native	NA	1	10	28.9
Hawai'i Island	18	Knight_Barton	1000	-155.252	19.403	2012	1	11865	Metrosideros polymorpha	34	1	0	native	NA	1	10	24.5
Hawai'i Island	18	Knight_Barton	1000	-155.252	19.403	2012	1	11874	Metrosideros polymorpha	34	1	0	native	NA	1	10	32
Hawai'i Island	18	Knight_Barton	1000	-155.252	19.403	2012	1	11875	Metrosideros polymorpha	34	1	0	native	NA	1	10	24.5
Hawai'i Island	18	Knight_Barton	1000	-155.252	19.403	2012	1	11884	Metrosideros polymorpha	34	1	0	native	NA	1	10	23
Hawai'i Island	18	Knight_Barton	1000	-155.252	19.403	2012	1	11885	Metrosideros polymorpha	34	1	0	native	NA	1	10	19.5
Hawai'i Island	18	Knight_Barton	1000	-155.252	19.403	2012	1	11886	Metrosideros polymorpha	34	1	0	native	NA	1	10	11.1
Hawai'i Island	18	Knight_Barton	1000	-155.252	19.403	2012	1	11887	Metrosideros polymorpha	34	1	0	native	NA	1	10	24.3
Hawai'i Island	18	Knight_Barton	1000	-155.252	19.403	2012	1	11890	Metrosideros polymorpha	34	1	0	native	NA	1	10	12.6
Hawai'i Island	18	Knight_Barton	1000	-155.252	19.403	2012	1	11892	Metrosideros polymorpha	34	1	0	native	NA	1	10	24.2
Hawai'i Island	18	Knight_Barton	1000	-155.252	19.403	2012	1	11895	Metrosideros polymorpha	34	1	0	native	NA	1	10	22
Hawai'i Island	18	Knight_Barton	1000	-155.252	19.403	2012	1	11897	Metrosideros polymorpha	34	1	0	native	NA	1	10	24.2
Hawai'i Island	18	Knight_Barton	1000	-155.252	19.403	2012	1	11904	Metrosideros polymorpha	34	1	0	native	NA	1	10	15.5
Hawai'i Island	18	Knight_Barton	1000	-155.252	19.403	2012	1	11908	Metrosideros polymorpha	34	1	0	native	NA	1	10	25.5
Hawai'i Island	18	Knight_Barton	1000	-155.252	19.403	2012	1	11911	Metrosideros polymorpha	34	1	0	native	NA	1	10	26.2
Hawai'i Island	18	Knight_Barton	1000	-155.252	19.403	2012	1	11914	Metrosideros polymorpha	34	1	0	native	NA	1	10	33.6
Hawai'i Island	18	Knight_Barton	1000	-155.252	19.403	2012	1	11915	Metrosideros polymorpha	34	1	0	native	NA	1	10	16.2
Hawai'i Island	18	Knight_Barton	1000	-155.252	19.403	2012	1	11917	Metrosideros polymorpha	34	1	0	native	NA	1	10	40.8
Hawai'i Island	18	Knight_Barton	1000	-155.252	19.403	2012	1	11918	Metrosideros polymorpha	34	1	0	native	NA	1	10	39
Hawai'i Island	18	Knight_Barton	1000	-155.252	19.403	2012	1	11919	Metrosideros polymorpha	34	1	0	native	NA	1	10	19.5
Hawai'i Island	18	Knight_Barton	1000	-155.252	19.403	2012	1	11920	Metrosideros polymorpha	34	1	0	native	NA	1	10	38.6
Hawai'i Island	18	Knight_Barton	1000	-155.252	19.403	2012	1	11921	Metrosideros polymorpha	34	1	0	native	NA	1	10	13
Hawai'i Island	18	Knight_Barton	1000	-155.252	19.403	2012	1	11923	Metrosideros polymorpha	34	1	0	native	NA	1	10	19.8
Hawai'i Island	18	Knight_Barton	1000	-155.252	19.403	2012	1	11926	Metrosideros polymorpha	34	1	0	native	NA	1	10	17.7
Hawai'i Island	18	Knight_Barton	1000	-155.252	19.403	2012	1	11891	Myrica faya	33	1	0	alien	1	1	10	35.6
Hawai'i Island	18	Knight_Barton	1000	-155.252	19.403	2012	1	11876	Myrica faya	33	1	0	alien	1	1	10	8.2
Hawai'i Island	18	Knight_Barton	1000	-155.252	19.403	2012	1	11924	Myrica faya	33	1	0	alien	1	1	10	64.5
Hawai'i Island	18	Knight_Barton	1000	-155.252	19.403	2012	1	11889	Myrica faya	33	1	0	alien	1	1	10	17
Hawai'i Island	18	Knight_Barton	1000	-155.252	19.403	2012	1	11879	Myrica faya	33	1	0	alien	1	1	10	36.2
Hawai'i Island	18	Knight_Barton	1000	-155.252	19.403	2012	1	11922	Myrica faya	33	1	0	alien	1	1	10	16.5
Hawai'i Island	18	Knight_Barton	1000	-155.252	19.403	2012	1	11878	Myrica faya	33	1	0	alien	1	1	10	25
Hawai'i Island	18	Knight_Barton	1000	-155.252	19.403	2012	1	11925	Myrica faya	33	1	0	alien	1	1	10	56
Hawai'i Island	18	Knight_Barton	1000	-155.252	19.403	2012	1	11888	Myrica faya	33	1	0	alien	1	1	10	27.8
Hawai'i Island	18	Knight_Barton	1000	-155.252	19.403	2012	1	11872	Myrica faya	33	1	0	alien	1	1	10	22.6
Hawai'i Island	18	Knight_Barton	1000	-155.252	19.403	2012	1	11883	Myrica faya	33	1	0	alien	1	1	10	36.3
Hawai'i Island	18	Knight_Barton	1000	-155.252	19.403	2012	1	11882	Myrica faya	33	1	0	alien	1	1	10	7
Hawai'i Island	18	Knight_Barton	1000	-155.252	19.403	2012	1	11881	Myrica faya	33	1	0	alien	1	1	10	32.3
Hawai'i Island	18	Knight_Barton	1000	-155.252	19.403	2012	1	11902	Myrica faya	33	1	0	alien	1	1	10	14.2
Hawai'i Island	18	Knight_Barton	1000	-155.252	19.403	2012	1	11899	Myrica faya	33	1	0	alien	1	1	10	24
Hawai'i Island	18	Knight_Barton	1000	-155.252	19.403	2012	1	11868	Myrica faya	33	1	0	alien	1	1	10	29.8
Hawai'i Island	18	Knight_Barton	1000	-155.252	19.403	2012	1	11871	Myrica faya	33	1	0	alien	1	1	10	30
Hawai'i Island	18	Knight_Barton	1000	-155.252	19.403	2012	1	11869	Myrica faya	33	1	0	alien	1	1	10	24.3
Hawai'i Island	18	Knight_Barton	1000	-155.252	19.403	2012	1	11896	Myrica faya	33	1	0	alien	1	1	10	32.7
Hawai'i Island	18	Knight_Barton	1000	-155.252	19.403	2012	1	11867	Myrica faya	33	1	0	alien	1	1	10	32.5
Hawai'i Island	18	Knight_Barton	1000	-155.252	19.403	2012	1	11866	Myrica faya	33	1	0	alien	1	1	10	5
Hawai'i Island	18	Knight_Barton	1000	-155.252	19.403	2012	1	11898	Myrica faya	33	1	0	alien	1	1	10	14.9
Hawai'i Island	18	Knight_Barton	1000	-155.252	19.403	2012	1	11857	Myrica faya	33	1	0	alien	1	1	10	33.5
Hawai'i Island	18	Knight_Barton	1000	-155.252	19.403	2012	1	11893	Myrica faya	33	1	0	alien	1	1	10	21
Hawai'i Island	18	Knight_Barton	1000	-155.252	19.403	2012	1	11870	Myrica faya	33	1	0	alien	1	1	10	22.9
Hawai'i Island	18	Knight_Barton	1000	-155.252	19.403	2012	1	11856	Myrica faya	33	1	0	alien	1	1	10	34.5
Hawai'i Island	18	Knight_Barton	1000	-155.252	19.403	2012	1	11906	Myrica faya	33	1	0	alien	1	1	10	32.3
Hawai'i Island	18	Knight_Barton	1000	-155.252	19.403	2012	1	11863	Myrica faya	33	1	0	alien	1	1	10	27.2
Hawai'i Island	18	Knight_Barton	1000	-155.252	19.403	2012	1	11858	Myrica faya	33	1	0	alien	1	1	10	69.7
Hawai'i Island	18	Knight_Barton	1000	-155.252	19.403	2012	1	11910	Myrica faya	33	1	0	alien	1	1	10	26
Hawai'i Island	18	Knight_Barton	1000	-155.252	19.403	2012	1	11901	Myrica faya	33	1	0	alien	1	1	10	39.4
Hawai'i Island	18	Knight_Barton	1000	-155.252	19.403	2012	1	11864	Myrica faya	33	1	0	alien	1	1	10	5.6
Hawai'i Island	18	Knight_Barton	1000	-155.252	19.403	2012	1	11855	Myrica faya	33	1	0	alien	1	1	10	23.4
Hawai'i Island	18	Knight_Barton	1000	-155.252	19.403	2012	1	11862	Myrica faya	33	1	0	alien	1	1	10	31
Hawai'i Island	51	PACN_Hawaii	1000	-155.411	19.49	2011	1	34695	Metrosideros polymorpha	34	1	0	native	NA	1	10	28.2
Hawai'i Island	52	PACN_Hawaii	1000	-155.546	19.311	2011	1	34762	Metrosideros polymorpha	34	1	0	native	NA	1	10	22.1
Hawai'i Island	52	PACN_Hawaii	1000	-155.546	19.311	2011	1	34763	Metrosideros polymorpha	34	1	0	native	NA	1	10	16.6
Hawai'i Island	52	PACN_Hawaii	1000	-155.546	19.311	2011	1	34767	Metrosideros polymorpha	34	1	0	native	NA	1	10	15.3
Hawai'i Island	52	PACN_Hawaii	1000	-155.546	19.311	2011	1	34769	Metrosideros polymorpha	34	1	0	native	NA	1	10	5.2
Hawai'i Island	52	PACN_Hawaii	1000	-155.546	19.311	2011	1	34770	Metrosideros polymorpha	34	1	0	native	NA	1	10	9.7
Hawai'i Island	52	PACN_Hawaii	1000	-155.546	19.311	2011	1	34771	Metrosideros polymorpha	34	1	0	native	NA	1	10	61
Hawai'i Island	52	PACN_Hawaii	1000	-155.546	19.311	2011	1	34774	Metrosideros polymorpha	34	1	0	native	NA	1	10	6.8
Hawai'i Island	52	PACN_Hawaii	1000	-155.546	19.311	2011	1	34776	Metrosideros polymorpha	34	1	0	native	NA	1	10	8.3
Hawai'i Island	52	PACN_Hawaii	1000	-155.546	19.311	2011	1	34777	Metrosideros polymorpha	34	1	0	native	NA	1	10	10
Hawai'i Island	52	PACN_Hawaii	1000	-155.546	19.311	2011	1	34782	Metrosideros polymorpha	34	1	0	native	NA	1	10	36.2
Hawai'i Island	52	PACN_Hawaii	1000	-155.546	19.311	2011	1	34783	Metrosideros polymorpha	34	1	0	native	NA	1	10	6.6
Hawai'i Island	52	PACN_Hawaii	1000	-155.546	19.311	2011	1	34786	Metrosideros polymorpha	34	1	0	native	NA	1	10	7.1
Hawai'i Island	52	PACN_Hawaii	1000	-155.546	19.311	2011	1	34787	Metrosideros polymorpha	34	1	0	native	NA	1	10	9
Hawai'i Island	52	PACN_Hawaii	1000	-155.546	19.311	2011	1	34792	Metrosideros polymorpha	34	1	0	native	NA	1	10	17.1
Hawai'i Island	52	PACN_Hawaii	1000	-155.546	19.311	2011	1	34793	Metrosideros polymorpha	34	1	0	native	NA	1	10	6.4
Hawai'i Island	52	PACN_Hawaii	1000	-155.546	19.311	2011	1	34799	Metrosideros polymorpha	34	1	0	native	NA	1	10	5
Hawai'i Island	52	PACN_Hawaii	1000	-155.546	19.311	2011	1	34800	Metrosideros polymorpha	34	1	0	native	NA	1	10	9.7
Hawai'i Island	52	PACN_Hawaii	1000	-155.546	19.311	2011	1	34801	Metrosideros polymorpha	34	1	0	native	NA	1	10	5.2
Hawai'i Island	52	PACN_Hawaii	1000	-155.546	19.311	2011	1	34806	Metrosideros polymorpha	34	1	0	native	NA	1	10	8.3
Hawai'i Island	52	PACN_Hawaii	1000	-155.546	19.311	2011	1	34766	Metrosideros polymorpha	34	1	0	native	NA	1	10	30.9
Hawai'i Island	52	PACN_Hawaii	1000	-155.546	19.311	2011	1	34768	Metrosideros polymorpha	34	1	0	native	NA	1	10	22.5
Hawai'i Island	52	PACN_Hawaii	1000	-155.546	19.311	2011	1	34778	Metrosideros polymorpha	34	1	0	native	NA	1	10	8.5
Hawai'i Island	52	PACN_Hawaii	1000	-155.546	19.311	2011	1	34781	Metrosideros polymorpha	34	1	0	native	NA	1	10	15.9
Hawai'i Island	52	PACN_Hawaii	1000	-155.546	19.311	2011	1	34784	Metrosideros polymorpha	34	1	0	native	NA	1	10	6
Hawai'i Island	52	PACN_Hawaii	1000	-155.546	19.311	2011	1	34791	Metrosideros polymorpha	34	1	0	native	NA	1	10	5.5
Hawai'i Island	52	PACN_Hawaii	1000	-155.546	19.311	2011	1	34794	Metrosideros polymorpha	34	1	0	native	NA	1	10	15.5
Hawai'i Island	52	PACN_Hawaii	1000	-155.546	19.311	2011	1	34797	Metrosideros polymorpha	34	1	0	native	NA	1	10	9.1
Hawai'i Island	52	PACN_Hawaii	1000	-155.546	19.311	2011	1	34803	Metrosideros polymorpha	34	1	0	native	NA	1	10	16.8
Hawai'i Island	52	PACN_Hawaii	1000	-155.546	19.311	2011	1	34785	Metrosideros polymorpha	34	1	0	native	NA	1	10	7.6
Hawai'i Island	52	PACN_Hawaii	1000	-155.546	19.311	2011	1	34795	Metrosideros polymorpha	34	1	0	native	NA	1	10	7.2
Hawai'i Island	53	PACN_Hawaii	1000	-155.554	19.342	2011	1	34917	Metrosideros polymorpha	34	1	0	native	NA	1	10	33.2
Hawai'i Island	54	PACN_Hawaii	1000	-155.742	19.406	2011	1	36628	Myoporum sandwicense	53	1	0	native	NA	1	10	63.4
Hawai'i Island	54	PACN_Hawaii	1000	-155.742	19.406	2011	1	36623	Sophora chrysophylla	28	1	0	native	NA	1	10	21.2
Hawai'i Island	54	PACN_Hawaii	1000	-155.742	19.406	2011	1	36624	Sophora chrysophylla	28	1	0	native	NA	1	10	8
Hawai'i Island	54	PACN_Hawaii	1000	-155.742	19.406	2011	1	36622	Sophora chrysophylla	28	1	0	native	NA	1	10	14
Hawai'i Island	54	PACN_Hawaii	1000	-155.742	19.406	2011	1	36627	Sophora chrysophylla	28	1	0	native	NA	1	10	21.5
Hawai'i Island	54	PACN_Hawaii	1000	-155.742	19.406	2011	1	36625	Sophora chrysophylla	28	1	0	native	NA	1	10	15.9
Hawai'i Island	54	PACN_Hawaii	1000	-155.742	19.406	2011	1	36629	Sophora chrysophylla	28	1	0	native	NA	1	10	28.2
Hawai'i Island	54	PACN_Hawaii	1000	-155.742	19.406	2011	1	36626	Sophora chrysophylla	28	1	0	native	NA	1	10	46.5
Hawai'i Island	55	PACN_Hawaii	1000	-155.407	19.485	2011	1	34687	Metrosideros polymorpha	34	1	0	native	NA	1	10	46.4
Hawai'i Island	55	PACN_Hawaii	1000	-155.407	19.485	2011	1	34690	Metrosideros polymorpha	34	1	0	native	NA	1	10	29.1
Hawai'i Island	55	PACN_Hawaii	1000	-155.407	19.485	2011	1	34692	Metrosideros polymorpha	34	1	0	native	NA	1	10	9
Hawai'i Island	55	PACN_Hawaii	1000	-155.407	19.485	2011	1	34693	Metrosideros polymorpha	34	1	0	native	NA	1	10	36.8
Hawai'i Island	55	PACN_Hawaii	1000	-155.407	19.485	2011	1	34694	Metrosideros polymorpha	34	1	0	native	NA	1	10	50.6
Hawai'i Island	55	PACN_Hawaii	1000	-155.407	19.485	2011	1	34689	Metrosideros polymorpha	34	1	0	native	NA	1	10	64.1
Hawai'i Island	56	PACN_Hawaii	1000	-155.392	19.49	2011	1	34676	Metrosideros polymorpha	34	1	0	native	NA	1	10	5.8
Hawai'i Island	57	PACN_Hawaii	1000	-155.551	19.332	2011	1	34809	Metrosideros polymorpha	34	1	0	native	NA	1	10	6
Hawai'i Island	57	PACN_Hawaii	1000	-155.551	19.332	2011	1	34810	Metrosideros polymorpha	34	1	0	native	NA	1	10	7.5
Hawai'i Island	57	PACN_Hawaii	1000	-155.551	19.332	2011	1	34814	Metrosideros polymorpha	34	1	0	native	NA	1	10	10.7
Hawai'i Island	57	PACN_Hawaii	1000	-155.551	19.332	2011	1	34815	Metrosideros polymorpha	34	1	0	native	NA	1	10	6.4
Hawai'i Island	57	PACN_Hawaii	1000	-155.551	19.332	2011	1	34816	Metrosideros polymorpha	34	1	0	native	NA	1	10	13.3
Hawai'i Island	57	PACN_Hawaii	1000	-155.551	19.332	2011	1	34829	Metrosideros polymorpha	34	1	0	native	NA	1	10	5.8
Hawai'i Island	57	PACN_Hawaii	1000	-155.551	19.332	2011	1	34831	Metrosideros polymorpha	34	1	0	native	NA	1	10	8.8
Hawai'i Island	57	PACN_Hawaii	1000	-155.551	19.332	2011	1	34835	Metrosideros polymorpha	34	1	0	native	NA	1	10	7
Hawai'i Island	57	PACN_Hawaii	1000	-155.551	19.332	2011	1	34836	Metrosideros polymorpha	34	1	0	native	NA	1	10	17.2
Hawai'i Island	57	PACN_Hawaii	1000	-155.551	19.332	2011	1	34844	Metrosideros polymorpha	34	1	0	native	NA	1	10	9.3
Hawai'i Island	57	PACN_Hawaii	1000	-155.551	19.332	2011	1	34850	Metrosideros polymorpha	34	1	0	native	NA	1	10	5.7
Hawai'i Island	57	PACN_Hawaii	1000	-155.551	19.332	2011	1	34852	Metrosideros polymorpha	34	1	0	native	NA	1	10	7.9
Hawai'i Island	57	PACN_Hawaii	1000	-155.551	19.332	2011	1	34861	Metrosideros polymorpha	34	1	0	native	NA	1	10	6
Hawai'i Island	57	PACN_Hawaii	1000	-155.551	19.332	2011	1	34864	Metrosideros polymorpha	34	1	0	native	NA	1	10	10.2
Hawai'i Island	57	PACN_Hawaii	1000	-155.551	19.332	2011	1	34854	Metrosideros polymorpha	34	1	0	native	NA	1	10	7
Hawai'i Island	57	PACN_Hawaii	1000	-155.551	19.332	2011	1	34812	Metrosideros polymorpha	34	1	0	native	NA	1	10	5.3
Hawai'i Island	57	PACN_Hawaii	1000	-155.551	19.332	2011	1	34821	Metrosideros polymorpha	34	1	0	native	NA	1	10	6
Hawai'i Island	57	PACN_Hawaii	1000	-155.551	19.332	2011	1	34837	Metrosideros polymorpha	34	1	0	native	NA	1	10	9.2
Hawai'i Island	57	PACN_Hawaii	1000	-155.551	19.332	2011	1	34846	Metrosideros polymorpha	34	1	0	native	NA	1	10	5.6
Hawai'i Island	57	PACN_Hawaii	1000	-155.551	19.332	2011	1	34818	Metrosideros polymorpha	34	1	0	native	NA	1	10	5.5
Hawai'i Island	57	PACN_Hawaii	1000	-155.551	19.332	2011	1	34819	Metrosideros polymorpha	34	1	0	native	NA	1	10	9.8
Hawai'i Island	58	PACN_Hawaii	1000	-155.556	19.298	2011	1	34959	Metrosideros polymorpha	34	1	0	native	NA	1	10	70.3
Hawai'i Island	58	PACN_Hawaii	1000	-155.556	19.298	2011	1	34971	Metrosideros polymorpha	34	1	0	native	NA	1	10	9.4
Hawai'i Island	58	PACN_Hawaii	1000	-155.556	19.298	2011	1	34985	Metrosideros polymorpha	34	1	0	native	NA	1	10	63.6
Hawai'i Island	58	PACN_Hawaii	1000	-155.556	19.298	2011	1	34957	Metrosideros polymorpha	34	1	0	native	NA	1	10	28
Hawai'i Island	58	PACN_Hawaii	1000	-155.556	19.298	2011	1	34977	Metrosideros polymorpha	34	1	0	native	NA	1	10	22.6
Hawai'i Island	58	PACN_Hawaii	1000	-155.556	19.298	2011	1	34956	Metrosideros polymorpha	34	1	0	native	NA	1	10	23.8
Hawai'i Island	58	PACN_Hawaii	1000	-155.556	19.298	2011	1	34958	Metrosideros polymorpha	34	1	0	native	NA	1	10	5.5
Hawai'i Island	58	PACN_Hawaii	1000	-155.556	19.298	2011	1	34969	Metrosideros polymorpha	34	1	0	native	NA	1	10	9.9
Hawai'i Island	58	PACN_Hawaii	1000	-155.556	19.298	2011	1	34973	Metrosideros polymorpha	34	1	0	native	NA	1	10	9.4
Hawai'i Island	58	PACN_Hawaii	1000	-155.556	19.298	2011	1	34975	Metrosideros polymorpha	34	1	0	native	NA	1	10	9
Hawai'i Island	58	PACN_Hawaii	1000	-155.556	19.298	2011	1	34978	Metrosideros polymorpha	34	1	0	native	NA	1	10	13.5
Hawai'i Island	58	PACN_Hawaii	1000	-155.556	19.298	2011	1	34982	Metrosideros polymorpha	34	1	0	native	NA	1	10	66.1
Hawai'i Island	58	PACN_Hawaii	1000	-155.556	19.298	2011	1	34983	Metrosideros polymorpha	34	1	0	native	NA	1	10	10.2
Hawai'i Island	58	PACN_Hawaii	1000	-155.556	19.298	2011	1	34984	Metrosideros polymorpha	34	1	0	native	NA	1	10	17.6
Hawai'i Island	58	PACN_Hawaii	1000	-155.556	19.298	2011	1	34989	Metrosideros polymorpha	34	1	0	native	NA	1	10	6.3
Hawai'i Island	58	PACN_Hawaii	1000	-155.556	19.298	2011	1	34954	Metrosideros polymorpha	34	1	0	native	NA	1	10	9.3
Hawai'i Island	58	PACN_Hawaii	1000	-155.556	19.298	2011	1	34952	Metrosideros polymorpha	34	1	0	native	NA	1	10	7.1
Hawai'i Island	58	PACN_Hawaii	1000	-155.556	19.298	2011	1	34953	Metrosideros polymorpha	34	1	0	native	NA	1	10	21.6
Hawai'i Island	58	PACN_Hawaii	1000	-155.556	19.298	2011	1	34955	Metrosideros polymorpha	34	1	0	native	NA	1	10	6.3
Hawai'i Island	58	PACN_Hawaii	1000	-155.556	19.298	2011	1	34963	Metrosideros polymorpha	34	1	0	native	NA	1	10	6.1
Hawai'i Island	58	PACN_Hawaii	1000	-155.556	19.298	2011	1	34965	Metrosideros polymorpha	34	1	0	native	NA	1	10	59.1
Hawai'i Island	58	PACN_Hawaii	1000	-155.556	19.298	2011	1	34967	Metrosideros polymorpha	34	1	0	native	NA	1	10	8.5
Hawai'i Island	58	PACN_Hawaii	1000	-155.556	19.298	2011	1	34968	Metrosideros polymorpha	34	1	0	native	NA	1	10	9.7
Hawai'i Island	58	PACN_Hawaii	1000	-155.556	19.298	2011	1	34980	Metrosideros polymorpha	34	1	0	native	NA	1	10	5.1
Hawai'i Island	58	PACN_Hawaii	1000	-155.556	19.298	2011	1	34981	Metrosideros polymorpha	34	1	0	native	NA	1	10	38.1
Hawai'i Island	58	PACN_Hawaii	1000	-155.556	19.298	2011	1	34960	Metrosideros polymorpha	34	1	0	native	NA	1	10	49.3
Hawai'i Island	59	PACN_Hawaii	1000	-155.574	19.296	2011	1	35230	Metrosideros polymorpha	34	1	0	native	NA	1	10	40.3
Hawai'i Island	59	PACN_Hawaii	1000	-155.574	19.296	2011	1	35232	Metrosideros polymorpha	34	1	0	native	NA	1	10	38.7
Hawai'i Island	59	PACN_Hawaii	1000	-155.574	19.296	2011	1	35233	Metrosideros polymorpha	34	1	0	native	NA	1	10	16.3
Hawai'i Island	59	PACN_Hawaii	1000	-155.574	19.296	2011	1	35236	Metrosideros polymorpha	34	1	0	native	NA	1	10	58.7
Hawai'i Island	59	PACN_Hawaii	1000	-155.574	19.296	2011	1	35237	Metrosideros polymorpha	34	1	0	native	NA	1	10	6.3
Hawai'i Island	59	PACN_Hawaii	1000	-155.574	19.296	2011	1	35239	Metrosideros polymorpha	34	1	0	native	NA	1	10	124.6
Hawai'i Island	59	PACN_Hawaii	1000	-155.574	19.296	2011	1	35242	Metrosideros polymorpha	34	1	0	native	NA	1	10	43.5
Hawai'i Island	59	PACN_Hawaii	1000	-155.574	19.296	2011	1	35246	Metrosideros polymorpha	34	1	0	native	NA	1	10	69.6
Hawai'i Island	59	PACN_Hawaii	1000	-155.574	19.296	2011	1	35249	Metrosideros polymorpha	34	1	0	native	NA	1	10	8.8
Hawai'i Island	59	PACN_Hawaii	1000	-155.574	19.296	2011	1	35231	Metrosideros polymorpha	34	1	0	native	NA	1	10	6.9
Hawai'i Island	59	PACN_Hawaii	1000	-155.574	19.296	2011	1	35235	Metrosideros polymorpha	34	1	0	native	NA	1	10	7.9
Hawai'i Island	59	PACN_Hawaii	1000	-155.574	19.296	2011	1	35229	Metrosideros polymorpha	34	1	0	native	NA	1	10	17.6
Hawai'i Island	59	PACN_Hawaii	1000	-155.574	19.296	2011	1	35238	Metrosideros polymorpha	34	1	0	native	NA	1	10	15.3
Hawai'i Island	59	PACN_Hawaii	1000	-155.574	19.296	2011	1	35241	Metrosideros polymorpha	34	1	0	native	NA	1	10	30.2
Hawai'i Island	59	PACN_Hawaii	1000	-155.574	19.296	2011	1	35244	Metrosideros polymorpha	34	1	0	native	NA	1	10	39.2
Hawai'i Island	59	PACN_Hawaii	1000	-155.574	19.296	2011	1	35245	Metrosideros polymorpha	34	1	0	native	NA	1	10	14.7
Hawai'i Island	59	PACN_Hawaii	1000	-155.574	19.296	2011	1	35254	Metrosideros polymorpha	34	1	0	native	NA	1	10	61.6
Hawai'i Island	60	PACN_Hawaii	1000	-155.561	19.302	2011	1	35046	Metrosideros polymorpha	34	1	0	native	NA	1	10	6
Hawai'i Island	60	PACN_Hawaii	1000	-155.561	19.302	2011	1	35087	Metrosideros polymorpha	34	1	0	native	NA	1	10	5.3
Hawai'i Island	60	PACN_Hawaii	1000	-155.561	19.302	2011	1	35091	Metrosideros polymorpha	34	1	0	native	NA	1	10	7.6
Hawai'i Island	60	PACN_Hawaii	1000	-155.561	19.302	2011	1	35103	Metrosideros polymorpha	34	1	0	native	NA	1	10	5.9
Hawai'i Island	60	PACN_Hawaii	1000	-155.561	19.302	2011	1	35055	Metrosideros polymorpha	34	1	0	native	NA	1	10	5.4
Hawai'i Island	60	PACN_Hawaii	1000	-155.561	19.302	2011	1	35060	Metrosideros polymorpha	34	1	0	native	NA	1	10	9
Hawai'i Island	60	PACN_Hawaii	1000	-155.561	19.302	2011	1	35084	Metrosideros polymorpha	34	1	0	native	NA	1	10	18.6
Hawai'i Island	60	PACN_Hawaii	1000	-155.561	19.302	2011	1	35115	Metrosideros polymorpha	34	1	0	native	NA	1	10	6.4
Hawai'i Island	60	PACN_Hawaii	1000	-155.561	19.302	2011	1	35077	Metrosideros polymorpha	34	1	0	native	NA	1	10	45.7
Hawai'i Island	60	PACN_Hawaii	1000	-155.561	19.302	2011	1	35089	Metrosideros polymorpha	34	1	0	native	NA	1	10	5.7
Hawai'i Island	60	PACN_Hawaii	1000	-155.561	19.302	2011	1	35116	Metrosideros polymorpha	34	1	0	native	NA	1	10	7.2
Hawai'i Island	60	PACN_Hawaii	1000	-155.561	19.302	2011	1	35051	Metrosideros polymorpha	34	1	0	native	NA	1	10	9.1
Hawai'i Island	60	PACN_Hawaii	1000	-155.561	19.302	2011	1	35052	Metrosideros polymorpha	34	1	0	native	NA	1	10	10
Hawai'i Island	60	PACN_Hawaii	1000	-155.561	19.302	2011	1	35061	Metrosideros polymorpha	34	1	0	native	NA	1	10	6.6
Hawai'i Island	60	PACN_Hawaii	1000	-155.561	19.302	2011	1	35079	Metrosideros polymorpha	34	1	0	native	NA	1	10	12.4
Hawai'i Island	60	PACN_Hawaii	1000	-155.561	19.302	2011	1	35080	Metrosideros polymorpha	34	1	0	native	NA	1	10	5.1
Hawai'i Island	60	PACN_Hawaii	1000	-155.561	19.302	2011	1	35101	Metrosideros polymorpha	34	1	0	native	NA	1	10	5.9
Hawai'i Island	60	PACN_Hawaii	1000	-155.561	19.302	2011	1	35102	Metrosideros polymorpha	34	1	0	native	NA	1	10	7.9
Hawai'i Island	60	PACN_Hawaii	1000	-155.561	19.302	2011	1	35104	Metrosideros polymorpha	34	1	0	native	NA	1	10	7.5
Hawai'i Island	60	PACN_Hawaii	1000	-155.561	19.302	2011	1	35117	Metrosideros polymorpha	34	1	0	native	NA	1	10	10.5
Hawai'i Island	60	PACN_Hawaii	1000	-155.561	19.302	2011	1	35120	Metrosideros polymorpha	34	1	0	native	NA	1	10	8.7
Hawai'i Island	60	PACN_Hawaii	1000	-155.561	19.302	2011	1	35033	Metrosideros polymorpha	34	1	0	native	NA	1	10	23.7
Hawai'i Island	60	PACN_Hawaii	1000	-155.561	19.302	2011	1	35059	Metrosideros polymorpha	34	1	0	native	NA	1	10	6.7
Hawai'i Island	60	PACN_Hawaii	1000	-155.561	19.302	2011	1	35034	Metrosideros polymorpha	34	1	0	native	NA	1	10	6.9
Hawai'i Island	60	PACN_Hawaii	1000	-155.561	19.302	2011	1	35042	Metrosideros polymorpha	34	1	0	native	NA	1	10	6.1
Hawai'i Island	60	PACN_Hawaii	1000	-155.561	19.302	2011	1	35069	Metrosideros polymorpha	34	1	0	native	NA	1	10	6.9
Hawai'i Island	60	PACN_Hawaii	1000	-155.561	19.302	2011	1	35056	Metrosideros polymorpha	34	1	0	native	NA	1	10	6
Hawai'i Island	60	PACN_Hawaii	1000	-155.561	19.302	2011	1	35076	Metrosideros polymorpha	34	1	0	native	NA	1	10	5.3
Hawai'i Island	60	PACN_Hawaii	1000	-155.561	19.302	2011	1	35035	Metrosideros polymorpha	34	1	0	native	NA	1	10	5.9
Hawai'i Island	60	PACN_Hawaii	1000	-155.561	19.302	2011	1	35063	Metrosideros polymorpha	34	1	0	native	NA	1	10	8.7
Hawai'i Island	60	PACN_Hawaii	1000	-155.561	19.302	2011	1	35068	Metrosideros polymorpha	34	1	0	native	NA	1	10	9.9
Hawai'i Island	60	PACN_Hawaii	1000	-155.561	19.302	2011	1	35048	Metrosideros polymorpha	34	1	0	native	NA	1	10	99.9
Hawai'i Island	60	PACN_Hawaii	1000	-155.561	19.302	2011	1	35088	Metrosideros polymorpha	34	1	0	native	NA	1	10	5
Hawai'i Island	60	PACN_Hawaii	1000	-155.561	19.302	2011	1	35094	Metrosideros polymorpha	34	1	0	native	NA	1	10	8.1
Hawai'i Island	61	PACN_Hawaii	1000	-155.601	19.267	2011	1	35627	Metrosideros polymorpha	34	1	0	native	NA	1	10	6.8
Hawai'i Island	61	PACN_Hawaii	1000	-155.601	19.267	2011	1	35630	Metrosideros polymorpha	34	1	0	native	NA	1	10	13.4
Hawai'i Island	61	PACN_Hawaii	1000	-155.601	19.267	2011	1	35643	Metrosideros polymorpha	34	1	0	native	NA	1	10	10.8
Hawai'i Island	61	PACN_Hawaii	1000	-155.601	19.267	2011	1	35646	Metrosideros polymorpha	34	1	0	native	NA	1	10	19.3
Hawai'i Island	61	PACN_Hawaii	1000	-155.601	19.267	2011	1	35648	Metrosideros polymorpha	34	1	0	native	NA	1	10	84.9
Hawai'i Island	61	PACN_Hawaii	1000	-155.601	19.267	2011	1	35626	Metrosideros polymorpha	34	1	0	native	NA	1	10	6.5
Hawai'i Island	61	PACN_Hawaii	1000	-155.601	19.267	2011	1	35644	Metrosideros polymorpha	34	1	0	native	NA	1	10	17.8
Hawai'i Island	61	PACN_Hawaii	1000	-155.601	19.267	2011	1	35628	Metrosideros polymorpha	34	1	0	native	NA	1	10	32.1
Hawai'i Island	61	PACN_Hawaii	1000	-155.601	19.267	2011	1	35629	Metrosideros polymorpha	34	1	0	native	NA	1	10	9.2
Hawai'i Island	61	PACN_Hawaii	1000	-155.601	19.267	2011	1	35635	Metrosideros polymorpha	34	1	0	native	NA	1	10	30.1
Hawai'i Island	61	PACN_Hawaii	1000	-155.601	19.267	2011	1	35636	Metrosideros polymorpha	34	1	0	native	NA	1	10	14.6
Hawai'i Island	61	PACN_Hawaii	1000	-155.601	19.267	2011	1	35642	Metrosideros polymorpha	34	1	0	native	NA	1	10	36.8
Hawai'i Island	61	PACN_Hawaii	1000	-155.601	19.267	2011	1	35645	Metrosideros polymorpha	34	1	0	native	NA	1	10	28.6
Hawai'i Island	61	PACN_Hawaii	1000	-155.601	19.267	2011	1	35657	Metrosideros polymorpha	34	1	0	native	NA	1	10	6.6
Hawai'i Island	61	PACN_Hawaii	1000	-155.601	19.267	2011	1	35656	Metrosideros polymorpha	34	1	0	native	NA	1	10	5
Hawai'i Island	61	PACN_Hawaii	1000	-155.601	19.267	2011	1	35651	Metrosideros polymorpha	34	1	0	native	NA	1	10	29.9
Hawai'i Island	61	PACN_Hawaii	1000	-155.601	19.267	2011	1	35647	Metrosideros polymorpha	34	1	0	native	NA	1	10	6.3
Hawai'i Island	62	PACN_Hawaii	1000	-155.527	19.329	2011	1	34697	Metrosideros polymorpha	34	1	0	native	NA	1	10	14
Hawai'i Island	62	PACN_Hawaii	1000	-155.527	19.329	2011	1	34698	Metrosideros polymorpha	34	1	0	native	NA	1	10	14
Hawai'i Island	62	PACN_Hawaii	1000	-155.527	19.329	2011	1	34699	Metrosideros polymorpha	34	1	0	native	NA	1	10	5.4
Hawai'i Island	62	PACN_Hawaii	1000	-155.527	19.329	2011	1	34700	Metrosideros polymorpha	34	1	0	native	NA	1	10	9.1
Hawai'i Island	62	PACN_Hawaii	1000	-155.527	19.329	2011	1	34701	Metrosideros polymorpha	34	1	0	native	NA	1	10	28.2
Hawai'i Island	62	PACN_Hawaii	1000	-155.527	19.329	2011	1	34702	Metrosideros polymorpha	34	1	0	native	NA	1	10	22.4
Hawai'i Island	62	PACN_Hawaii	1000	-155.527	19.329	2011	1	34704	Metrosideros polymorpha	34	1	0	native	NA	1	10	23.7
Hawai'i Island	62	PACN_Hawaii	1000	-155.527	19.329	2011	1	34705	Metrosideros polymorpha	34	1	0	native	NA	1	10	5.6
Hawai'i Island	62	PACN_Hawaii	1000	-155.527	19.329	2011	1	34707	Metrosideros polymorpha	34	1	0	native	NA	1	10	5.3
Hawai'i Island	62	PACN_Hawaii	1000	-155.527	19.329	2011	1	34709	Metrosideros polymorpha	34	1	0	native	NA	1	10	7.8
Hawai'i Island	62	PACN_Hawaii	1000	-155.527	19.329	2011	1	34714	Metrosideros polymorpha	34	1	0	native	NA	1	10	10.9
Hawai'i Island	62	PACN_Hawaii	1000	-155.527	19.329	2011	1	34718	Metrosideros polymorpha	34	1	0	native	NA	1	10	8.8
Hawai'i Island	62	PACN_Hawaii	1000	-155.527	19.329	2011	1	34722	Metrosideros polymorpha	34	1	0	native	NA	1	10	6.6
Hawai'i Island	62	PACN_Hawaii	1000	-155.527	19.329	2011	1	34723	Metrosideros polymorpha	34	1	0	native	NA	1	10	7.6
Hawai'i Island	62	PACN_Hawaii	1000	-155.527	19.329	2011	1	34725	Metrosideros polymorpha	34	1	0	native	NA	1	10	8.1
Hawai'i Island	62	PACN_Hawaii	1000	-155.527	19.329	2011	1	34728	Metrosideros polymorpha	34	1	0	native	NA	1	10	9.9
Hawai'i Island	62	PACN_Hawaii	1000	-155.527	19.329	2011	1	34729	Metrosideros polymorpha	34	1	0	native	NA	1	10	12
Hawai'i Island	62	PACN_Hawaii	1000	-155.527	19.329	2011	1	34730	Metrosideros polymorpha	34	1	0	native	NA	1	10	5.3
Hawai'i Island	62	PACN_Hawaii	1000	-155.527	19.329	2011	1	34731	Metrosideros polymorpha	34	1	0	native	NA	1	10	6.1
Hawai'i Island	62	PACN_Hawaii	1000	-155.527	19.329	2011	1	34733	Metrosideros polymorpha	34	1	0	native	NA	1	10	35.8
Hawai'i Island	62	PACN_Hawaii	1000	-155.527	19.329	2011	1	34734	Metrosideros polymorpha	34	1	0	native	NA	1	10	11.8
Hawai'i Island	62	PACN_Hawaii	1000	-155.527	19.329	2011	1	34735	Metrosideros polymorpha	34	1	0	native	NA	1	10	21
Hawai'i Island	62	PACN_Hawaii	1000	-155.527	19.329	2011	1	34737	Metrosideros polymorpha	34	1	0	native	NA	1	10	8.7
Hawai'i Island	62	PACN_Hawaii	1000	-155.527	19.329	2011	1	34743	Metrosideros polymorpha	34	1	0	native	NA	1	10	6.6
Hawai'i Island	62	PACN_Hawaii	1000	-155.527	19.329	2011	1	34745	Metrosideros polymorpha	34	1	0	native	NA	1	10	28
Hawai'i Island	62	PACN_Hawaii	1000	-155.527	19.329	2011	1	34747	Metrosideros polymorpha	34	1	0	native	NA	1	10	7.2
Hawai'i Island	62	PACN_Hawaii	1000	-155.527	19.329	2011	1	34748	Metrosideros polymorpha	34	1	0	native	NA	1	10	5.2
Hawai'i Island	62	PACN_Hawaii	1000	-155.527	19.329	2011	1	34756	Metrosideros polymorpha	34	1	0	native	NA	1	10	22.9
Hawai'i Island	62	PACN_Hawaii	1000	-155.527	19.329	2011	1	34757	Metrosideros polymorpha	34	1	0	native	NA	1	10	8
Hawai'i Island	62	PACN_Hawaii	1000	-155.527	19.329	2011	1	34758	Metrosideros polymorpha	34	1	0	native	NA	1	10	8.7
Hawai'i Island	62	PACN_Hawaii	1000	-155.527	19.329	2011	1	34759	Metrosideros polymorpha	34	1	0	native	NA	1	10	9.8
Hawai'i Island	62	PACN_Hawaii	1000	-155.527	19.329	2011	1	34706	Metrosideros polymorpha	34	1	0	native	NA	1	10	8.2
Hawai'i Island	62	PACN_Hawaii	1000	-155.527	19.329	2011	1	34720	Metrosideros polymorpha	34	1	0	native	NA	1	10	7.4
Hawai'i Island	62	PACN_Hawaii	1000	-155.527	19.329	2011	1	34749	Metrosideros polymorpha	34	1	0	native	NA	1	10	5.8
Hawai'i Island	62	PACN_Hawaii	1000	-155.527	19.329	2011	1	34750	Metrosideros polymorpha	34	1	0	native	NA	1	10	7.4
Hawai'i Island	62	PACN_Hawaii	1000	-155.527	19.329	2011	1	34752	Metrosideros polymorpha	34	1	0	native	NA	1	10	6.4
Hawai'i Island	62	PACN_Hawaii	1000	-155.527	19.329	2011	1	34755	Metrosideros polymorpha	34	1	0	native	NA	1	10	37.2
Hawai'i Island	62	PACN_Hawaii	1000	-155.527	19.329	2011	1	34736	Metrosideros polymorpha	34	1	0	native	NA	1	10	17.5
Hawai'i Island	63	PACN_Hawaii	1000	-155.555	19.349	2011	1	34951	Metrosideros polymorpha	34	1	0	native	NA	1	10	47.1
Hawai'i Island	64	PACN_Hawaii	1000	-155.404	19.513	2011	1	34677	Metrosideros polymorpha	34	1	0	native	NA	1	10	74.2
Hawai'i Island	64	PACN_Hawaii	1000	-155.404	19.513	2011	1	34678	Metrosideros polymorpha	34	1	0	native	NA	1	10	7
Hawai'i Island	64	PACN_Hawaii	1000	-155.404	19.513	2011	1	34679	Metrosideros polymorpha	34	1	0	native	NA	1	10	20.8
Hawai'i Island	64	PACN_Hawaii	1000	-155.404	19.513	2011	1	34680	Metrosideros polymorpha	34	1	0	native	NA	1	10	49.2
Hawai'i Island	64	PACN_Hawaii	1000	-155.404	19.513	2011	1	34681	Metrosideros polymorpha	34	1	0	native	NA	1	10	16.4
Hawai'i Island	64	PACN_Hawaii	1000	-155.404	19.513	2011	1	34683	Metrosideros polymorpha	34	1	0	native	NA	1	10	30.7
Hawai'i Island	65	PACN_Hawaii	1000	-155.74	19.394	2011	1	36614	Sophora chrysophylla	28	1	0	native	NA	1	10	16.9
Hawai'i Island	65	PACN_Hawaii	1000	-155.74	19.394	2011	1	36613	Sophora chrysophylla	28	1	0	native	NA	1	10	29.1
Hawai'i Island	65	PACN_Hawaii	1000	-155.74	19.394	2011	1	36618	Sophora chrysophylla	28	1	0	native	NA	1	10	25.8
Hawai'i Island	65	PACN_Hawaii	1000	-155.74	19.394	2011	1	36616	Sophora chrysophylla	28	1	0	native	NA	1	10	23.7
Hawai'i Island	65	PACN_Hawaii	1000	-155.74	19.394	2011	1	36619	Sophora chrysophylla	28	1	0	native	NA	1	10	141
Hawai'i Island	65	PACN_Hawaii	1000	-155.74	19.394	2011	1	36621	Sophora chrysophylla	28	1	0	native	NA	1	10	50.9
Hawai'i Island	65	PACN_Hawaii	1000	-155.74	19.394	2011	1	36617	Sophora chrysophylla	28	1	0	native	NA	1	10	16.3
Hawai'i Island	65	PACN_Hawaii	1000	-155.74	19.394	2011	1	36620	Sophora chrysophylla	28	1	0	native	NA	1	10	29.2
Hawai'i Island	65	PACN_Hawaii	1000	-155.74	19.394	2011	1	36615	Sophora chrysophylla	28	1	0	native	NA	1	10	24.8
Hawai'i Island	66	PACN_Hawaii	1000	-155.552	19.327	2011	1	34870	Metrosideros polymorpha	34	1	0	native	NA	1	10	42.6
Hawai'i Island	66	PACN_Hawaii	1000	-155.552	19.327	2011	1	34871	Metrosideros polymorpha	34	1	0	native	NA	1	10	26.9
Hawai'i Island	66	PACN_Hawaii	1000	-155.552	19.327	2011	1	34873	Metrosideros polymorpha	34	1	0	native	NA	1	10	8.5
Hawai'i Island	66	PACN_Hawaii	1000	-155.552	19.327	2011	1	34880	Metrosideros polymorpha	34	1	0	native	NA	1	10	14.8
Hawai'i Island	66	PACN_Hawaii	1000	-155.552	19.327	2011	1	34888	Metrosideros polymorpha	34	1	0	native	NA	1	10	9.6
Hawai'i Island	66	PACN_Hawaii	1000	-155.552	19.327	2011	1	34898	Metrosideros polymorpha	34	1	0	native	NA	1	10	8.7
Hawai'i Island	66	PACN_Hawaii	1000	-155.552	19.327	2011	1	34902	Metrosideros polymorpha	34	1	0	native	NA	1	10	15
Hawai'i Island	66	PACN_Hawaii	1000	-155.552	19.327	2011	1	34903	Metrosideros polymorpha	34	1	0	native	NA	1	10	53.3
Hawai'i Island	66	PACN_Hawaii	1000	-155.552	19.327	2011	1	34908	Metrosideros polymorpha	34	1	0	native	NA	1	10	23
Hawai'i Island	66	PACN_Hawaii	1000	-155.552	19.327	2011	1	34910	Metrosideros polymorpha	34	1	0	native	NA	1	10	7.6
Hawai'i Island	66	PACN_Hawaii	1000	-155.552	19.327	2011	1	34912	Metrosideros polymorpha	34	1	0	native	NA	1	10	13.9
Hawai'i Island	66	PACN_Hawaii	1000	-155.552	19.327	2011	1	34913	Metrosideros polymorpha	34	1	0	native	NA	1	10	11.8
Hawai'i Island	66	PACN_Hawaii	1000	-155.552	19.327	2011	1	34899	Metrosideros polymorpha	34	1	0	native	NA	1	10	17.2
Hawai'i Island	66	PACN_Hawaii	1000	-155.552	19.327	2011	1	34915	Metrosideros polymorpha	34	1	0	native	NA	1	10	35.1
Hawai'i Island	66	PACN_Hawaii	1000	-155.552	19.327	2011	1	34895	Metrosideros polymorpha	34	1	0	native	NA	1	10	46.5
Hawai'i Island	66	PACN_Hawaii	1000	-155.552	19.327	2011	1	34896	Metrosideros polymorpha	34	1	0	native	NA	1	10	7.5
Hawai'i Island	66	PACN_Hawaii	1000	-155.552	19.327	2011	1	34874	Metrosideros polymorpha	34	1	0	native	NA	1	10	38.2
Hawai'i Island	66	PACN_Hawaii	1000	-155.552	19.327	2011	1	34884	Metrosideros polymorpha	34	1	0	native	NA	1	10	14.2
Hawai'i Island	66	PACN_Hawaii	1000	-155.552	19.327	2011	1	34885	Metrosideros polymorpha	34	1	0	native	NA	1	10	17.3
Hawai'i Island	66	PACN_Hawaii	1000	-155.552	19.327	2011	1	34886	Metrosideros polymorpha	34	1	0	native	NA	1	10	7
Hawai'i Island	66	PACN_Hawaii	1000	-155.552	19.327	2011	1	34890	Metrosideros polymorpha	34	1	0	native	NA	1	10	8.8
Hawai'i Island	66	PACN_Hawaii	1000	-155.552	19.327	2011	1	34877	Metrosideros polymorpha	34	1	0	native	NA	1	10	12
Hawai'i Island	66	PACN_Hawaii	1000	-155.552	19.327	2011	1	34879	Metrosideros polymorpha	34	1	0	native	NA	1	10	21.3
Hawai'i Island	66	PACN_Hawaii	1000	-155.552	19.327	2011	1	34881	Metrosideros polymorpha	34	1	0	native	NA	1	10	101
Hawai'i Island	66	PACN_Hawaii	1000	-155.552	19.327	2011	1	34883	Metrosideros polymorpha	34	1	0	native	NA	1	10	52.6
Hawai'i Island	66	PACN_Hawaii	1000	-155.552	19.327	2011	1	34891	Metrosideros polymorpha	34	1	0	native	NA	1	10	9.5
Hawai'i Island	66	PACN_Hawaii	1000	-155.552	19.327	2011	1	34892	Metrosideros polymorpha	34	1	0	native	NA	1	10	40.8
Hawai'i Island	66	PACN_Hawaii	1000	-155.552	19.327	2011	1	34893	Metrosideros polymorpha	34	1	0	native	NA	1	10	14.3
Hawai'i Island	66	PACN_Hawaii	1000	-155.552	19.327	2011	1	34894	Metrosideros polymorpha	34	1	0	native	NA	1	10	36.5
Hawai'i Island	66	PACN_Hawaii	1000	-155.552	19.327	2011	1	34897	Metrosideros polymorpha	34	1	0	native	NA	1	10	9.2
Hawai'i Island	66	PACN_Hawaii	1000	-155.552	19.327	2011	1	34900	Metrosideros polymorpha	34	1	0	native	NA	1	10	9.8
Hawai'i Island	66	PACN_Hawaii	1000	-155.552	19.327	2011	1	34905	Metrosideros polymorpha	34	1	0	native	NA	1	10	14.3
Hawai'i Island	66	PACN_Hawaii	1000	-155.552	19.327	2011	1	34906	Metrosideros polymorpha	34	1	0	native	NA	1	10	43.9
Hawai'i Island	66	PACN_Hawaii	1000	-155.552	19.327	2011	1	34909	Metrosideros polymorpha	34	1	0	native	NA	1	10	16.3
Hawai'i Island	66	PACN_Hawaii	1000	-155.552	19.327	2011	1	34914	Metrosideros polymorpha	34	1	0	native	NA	1	10	24.3
Hawai'i Island	66	PACN_Hawaii	1000	-155.552	19.327	2011	1	34872	Metrosideros polymorpha	34	1	0	native	NA	1	10	28
Hawai'i Island	66	PACN_Hawaii	1000	-155.552	19.327	2011	1	34875	Metrosideros polymorpha	34	1	0	native	NA	1	10	6.3
Hawai'i Island	66	PACN_Hawaii	1000	-155.552	19.327	2011	1	34904	Metrosideros polymorpha	34	1	0	native	NA	1	10	21.2
Hawai'i Island	67	PACN_Hawaii	1000	-155.583	19.275	2011	1	35416	Metrosideros polymorpha	34	1	0	native	NA	1	10	26.9
Hawai'i Island	67	PACN_Hawaii	1000	-155.583	19.275	2011	1	35417	Metrosideros polymorpha	34	1	0	native	NA	1	10	5.9
Hawai'i Island	67	PACN_Hawaii	1000	-155.583	19.275	2011	1	35418	Metrosideros polymorpha	34	1	0	native	NA	1	10	36.9
Hawai'i Island	67	PACN_Hawaii	1000	-155.583	19.275	2011	1	35425	Metrosideros polymorpha	34	1	0	native	NA	1	10	10.4
Hawai'i Island	67	PACN_Hawaii	1000	-155.583	19.275	2011	1	35427	Metrosideros polymorpha	34	1	0	native	NA	1	10	31.1
Hawai'i Island	67	PACN_Hawaii	1000	-155.583	19.275	2011	1	35428	Metrosideros polymorpha	34	1	0	native	NA	1	10	9
Hawai'i Island	67	PACN_Hawaii	1000	-155.583	19.275	2011	1	35430	Metrosideros polymorpha	34	1	0	native	NA	1	10	8.4
Hawai'i Island	67	PACN_Hawaii	1000	-155.583	19.275	2011	1	35431	Metrosideros polymorpha	34	1	0	native	NA	1	10	8.4
Hawai'i Island	67	PACN_Hawaii	1000	-155.583	19.275	2011	1	35432	Metrosideros polymorpha	34	1	0	native	NA	1	10	20.7
Hawai'i Island	67	PACN_Hawaii	1000	-155.583	19.275	2011	1	35434	Metrosideros polymorpha	34	1	0	native	NA	1	10	7.3
Hawai'i Island	67	PACN_Hawaii	1000	-155.583	19.275	2011	1	35442	Metrosideros polymorpha	34	1	0	native	NA	1	10	31.4
Hawai'i Island	67	PACN_Hawaii	1000	-155.583	19.275	2011	1	35443	Metrosideros polymorpha	34	1	0	native	NA	1	10	20.2
Hawai'i Island	67	PACN_Hawaii	1000	-155.583	19.275	2011	1	35446	Metrosideros polymorpha	34	1	0	native	NA	1	10	17
Hawai'i Island	67	PACN_Hawaii	1000	-155.583	19.275	2011	1	35447	Metrosideros polymorpha	34	1	0	native	NA	1	10	8
Hawai'i Island	67	PACN_Hawaii	1000	-155.583	19.275	2011	1	35452	Metrosideros polymorpha	34	1	0	native	NA	1	10	15.7
Hawai'i Island	67	PACN_Hawaii	1000	-155.583	19.275	2011	1	35453	Metrosideros polymorpha	34	1	0	native	NA	1	10	11.4
Hawai'i Island	67	PACN_Hawaii	1000	-155.583	19.275	2011	1	35454	Metrosideros polymorpha	34	1	0	native	NA	1	10	9
Hawai'i Island	67	PACN_Hawaii	1000	-155.583	19.275	2011	1	35456	Metrosideros polymorpha	34	1	0	native	NA	1	10	9.3
Hawai'i Island	67	PACN_Hawaii	1000	-155.583	19.275	2011	1	35458	Metrosideros polymorpha	34	1	0	native	NA	1	10	38.1
Hawai'i Island	67	PACN_Hawaii	1000	-155.583	19.275	2011	1	35460	Metrosideros polymorpha	34	1	0	native	NA	1	10	8.9
Hawai'i Island	67	PACN_Hawaii	1000	-155.583	19.275	2011	1	35461	Metrosideros polymorpha	34	1	0	native	NA	1	10	23.9
Hawai'i Island	67	PACN_Hawaii	1000	-155.583	19.275	2011	1	35463	Metrosideros polymorpha	34	1	0	native	NA	1	10	11.9
Hawai'i Island	67	PACN_Hawaii	1000	-155.583	19.275	2011	1	35464	Metrosideros polymorpha	34	1	0	native	NA	1	10	10.6
Hawai'i Island	67	PACN_Hawaii	1000	-155.583	19.275	2011	1	35465	Metrosideros polymorpha	34	1	0	native	NA	1	10	38.1
Hawai'i Island	67	PACN_Hawaii	1000	-155.583	19.275	2011	1	35467	Metrosideros polymorpha	34	1	0	native	NA	1	10	31.7
Hawai'i Island	67	PACN_Hawaii	1000	-155.583	19.275	2011	1	35468	Metrosideros polymorpha	34	1	0	native	NA	1	10	8.2
Hawai'i Island	67	PACN_Hawaii	1000	-155.583	19.275	2011	1	35469	Metrosideros polymorpha	34	1	0	native	NA	1	10	13.2
Hawai'i Island	67	PACN_Hawaii	1000	-155.583	19.275	2011	1	35471	Metrosideros polymorpha	34	1	0	native	NA	1	10	5.2
Hawai'i Island	67	PACN_Hawaii	1000	-155.583	19.275	2011	1	35475	Metrosideros polymorpha	34	1	0	native	NA	1	10	7.6
Hawai'i Island	67	PACN_Hawaii	1000	-155.583	19.275	2011	1	35476	Metrosideros polymorpha	34	1	0	native	NA	1	10	8.6
Hawai'i Island	67	PACN_Hawaii	1000	-155.583	19.275	2011	1	35477	Metrosideros polymorpha	34	1	0	native	NA	1	10	18.6
Hawai'i Island	67	PACN_Hawaii	1000	-155.583	19.275	2011	1	35478	Metrosideros polymorpha	34	1	0	native	NA	1	10	8.7
Hawai'i Island	67	PACN_Hawaii	1000	-155.583	19.275	2011	1	35479	Metrosideros polymorpha	34	1	0	native	NA	1	10	42.1
Hawai'i Island	67	PACN_Hawaii	1000	-155.583	19.275	2011	1	35480	Metrosideros polymorpha	34	1	0	native	NA	1	10	10.8
Hawai'i Island	67	PACN_Hawaii	1000	-155.583	19.275	2011	1	35482	Metrosideros polymorpha	34	1	0	native	NA	1	10	19.2
Hawai'i Island	67	PACN_Hawaii	1000	-155.583	19.275	2011	1	35489	Metrosideros polymorpha	34	1	0	native	NA	1	10	8
Hawai'i Island	67	PACN_Hawaii	1000	-155.583	19.275	2011	1	35490	Metrosideros polymorpha	34	1	0	native	NA	1	10	8
Hawai'i Island	67	PACN_Hawaii	1000	-155.583	19.275	2011	1	35492	Metrosideros polymorpha	34	1	0	native	NA	1	10	26.6
Hawai'i Island	67	PACN_Hawaii	1000	-155.583	19.275	2011	1	35494	Metrosideros polymorpha	34	1	0	native	NA	1	10	13.3
Hawai'i Island	67	PACN_Hawaii	1000	-155.583	19.275	2011	1	35498	Metrosideros polymorpha	34	1	0	native	NA	1	10	21
Hawai'i Island	67	PACN_Hawaii	1000	-155.583	19.275	2011	1	35499	Metrosideros polymorpha	34	1	0	native	NA	1	10	36.6
Hawai'i Island	67	PACN_Hawaii	1000	-155.583	19.275	2011	1	35501	Metrosideros polymorpha	34	1	0	native	NA	1	10	10.1
Hawai'i Island	67	PACN_Hawaii	1000	-155.583	19.275	2011	1	35504	Metrosideros polymorpha	34	1	0	native	NA	1	10	54.3
Hawai'i Island	67	PACN_Hawaii	1000	-155.583	19.275	2011	1	35420	Metrosideros polymorpha	34	1	0	native	NA	1	10	5.9
Hawai'i Island	67	PACN_Hawaii	1000	-155.583	19.275	2011	1	35506	Metrosideros polymorpha	34	1	0	native	NA	1	10	34.8
Hawai'i Island	67	PACN_Hawaii	1000	-155.583	19.275	2011	1	35451	Metrosideros polymorpha	34	1	0	native	NA	1	10	7.1
Hawai'i Island	67	PACN_Hawaii	1000	-155.583	19.275	2011	1	35502	Metrosideros polymorpha	34	1	0	native	NA	1	10	39.8
Hawai'i Island	67	PACN_Hawaii	1000	-155.583	19.275	2011	1	35450	Metrosideros polymorpha	34	1	0	native	NA	1	10	14.2
Hawai'i Island	67	PACN_Hawaii	1000	-155.583	19.275	2011	1	35462	Metrosideros polymorpha	34	1	0	native	NA	1	10	9.2
Hawai'i Island	67	PACN_Hawaii	1000	-155.583	19.275	2011	1	35472	Metrosideros polymorpha	34	1	0	native	NA	1	10	11.5
Hawai'i Island	67	PACN_Hawaii	1000	-155.583	19.275	2011	1	35474	Metrosideros polymorpha	34	1	0	native	NA	1	10	17.1
Hawai'i Island	67	PACN_Hawaii	1000	-155.583	19.275	2011	1	35493	Metrosideros polymorpha	34	1	0	native	NA	1	10	23.9
Hawai'i Island	67	PACN_Hawaii	1000	-155.583	19.275	2011	1	35495	Metrosideros polymorpha	34	1	0	native	NA	1	10	9.4
Hawai'i Island	67	PACN_Hawaii	1000	-155.583	19.275	2011	1	35496	Metrosideros polymorpha	34	1	0	native	NA	1	10	14.4
Hawai'i Island	67	PACN_Hawaii	1000	-155.583	19.275	2011	1	35497	Metrosideros polymorpha	34	1	0	native	NA	1	10	10.5
Hawai'i Island	67	PACN_Hawaii	1000	-155.583	19.275	2011	1	35500	Metrosideros polymorpha	34	1	0	native	NA	1	10	5.7
Hawai'i Island	68	PACN_Hawaii	1000	-155.565	19.31	2011	1	35225	Metrosideros polymorpha	34	1	0	native	NA	1	10	59.1
Hawai'i Island	68	PACN_Hawaii	1000	-155.565	19.31	2011	1	35224	Metrosideros polymorpha	34	1	0	native	NA	1	10	6.7
Hawai'i Island	68	PACN_Hawaii	1000	-155.565	19.31	2011	1	35226	Metrosideros polymorpha	34	1	0	native	NA	1	10	6.8
Hawai'i Island	68	PACN_Hawaii	1000	-155.565	19.31	2011	1	35219	Metrosideros polymorpha	34	1	0	native	NA	1	10	181
Hawai'i Island	68	PACN_Hawaii	1000	-155.565	19.31	2011	1	35220	Metrosideros polymorpha	34	1	0	native	NA	1	10	7.5
Hawai'i Island	68	PACN_Hawaii	1000	-155.565	19.31	2011	1	35221	Metrosideros polymorpha	34	1	0	native	NA	1	10	46.4
Hawai'i Island	68	PACN_Hawaii	1000	-155.565	19.31	2011	1	35223	Metrosideros polymorpha	34	1	0	native	NA	1	10	37.4
Hawai'i Island	68	PACN_Hawaii	1000	-155.565	19.31	2011	1	35228	Metrosideros polymorpha	34	1	0	native	NA	1	10	5
Hawai'i Island	69	PACN_Hawaii	1000	-155.56	19.308	2011	1	34994	Metrosideros polymorpha	34	1	0	native	NA	1	10	38.1
Hawai'i Island	69	PACN_Hawaii	1000	-155.56	19.308	2011	1	35007	Metrosideros polymorpha	34	1	0	native	NA	1	10	47
Hawai'i Island	69	PACN_Hawaii	1000	-155.56	19.308	2011	1	35011	Metrosideros polymorpha	34	1	0	native	NA	1	10	21.1
Hawai'i Island	69	PACN_Hawaii	1000	-155.56	19.308	2011	1	35003	Metrosideros polymorpha	34	1	0	native	NA	1	10	65.4
Hawai'i Island	69	PACN_Hawaii	1000	-155.56	19.308	2011	1	35017	Metrosideros polymorpha	34	1	0	native	NA	1	10	6.9
Hawai'i Island	69	PACN_Hawaii	1000	-155.56	19.308	2011	1	35023	Metrosideros polymorpha	34	1	0	native	NA	1	10	9.8
Hawai'i Island	69	PACN_Hawaii	1000	-155.56	19.308	2011	1	34997	Metrosideros polymorpha	34	1	0	native	NA	1	10	14.5
Hawai'i Island	69	PACN_Hawaii	1000	-155.56	19.308	2011	1	35027	Metrosideros polymorpha	34	1	0	native	NA	1	10	9.9
Hawai'i Island	69	PACN_Hawaii	1000	-155.56	19.308	2011	1	35008	Metrosideros polymorpha	34	1	0	native	NA	1	10	36.6
Hawai'i Island	69	PACN_Hawaii	1000	-155.56	19.308	2011	1	35013	Metrosideros polymorpha	34	1	0	native	NA	1	10	6.3
Hawai'i Island	69	PACN_Hawaii	1000	-155.56	19.308	2011	1	35014	Metrosideros polymorpha	34	1	0	native	NA	1	10	31.3
Hawai'i Island	69	PACN_Hawaii	1000	-155.56	19.308	2011	1	34999	Metrosideros polymorpha	34	1	0	native	NA	1	10	6.6
Hawai'i Island	70	PACN_Hawaii	1000	-155.554	19.338	2011	1	34947	Metrosideros polymorpha	34	1	0	native	NA	1	10	51.3
Hawai'i Island	70	PACN_Hawaii	1000	-155.554	19.338	2011	1	34949	Metrosideros polymorpha	34	1	0	native	NA	1	10	8.6
Hawai'i Island	70	PACN_Hawaii	1000	-155.554	19.338	2011	1	34932	Metrosideros polymorpha	34	1	0	native	NA	1	10	17.7
Hawai'i Island	70	PACN_Hawaii	1000	-155.554	19.338	2011	1	34937	Metrosideros polymorpha	34	1	0	native	NA	1	10	25.7
Hawai'i Island	70	PACN_Hawaii	1000	-155.554	19.338	2011	1	34924	Metrosideros polymorpha	34	1	0	native	NA	1	10	5.8
Hawai'i Island	70	PACN_Hawaii	1000	-155.554	19.338	2011	1	34927	Metrosideros polymorpha	34	1	0	native	NA	1	10	7.6
Hawai'i Island	70	PACN_Hawaii	1000	-155.554	19.338	2011	1	34938	Metrosideros polymorpha	34	1	0	native	NA	1	10	67.8
Hawai'i Island	70	PACN_Hawaii	1000	-155.554	19.338	2011	1	34940	Metrosideros polymorpha	34	1	0	native	NA	1	10	9.7
Hawai'i Island	70	PACN_Hawaii	1000	-155.554	19.338	2011	1	34943	Metrosideros polymorpha	34	1	0	native	NA	1	10	9
Hawai'i Island	70	PACN_Hawaii	1000	-155.554	19.338	2011	1	34944	Metrosideros polymorpha	34	1	0	native	NA	1	10	8
Hawai'i Island	70	PACN_Hawaii	1000	-155.554	19.338	2011	1	34948	Metrosideros polymorpha	34	1	0	native	NA	1	10	8.7
Hawai'i Island	70	PACN_Hawaii	1000	-155.554	19.338	2011	1	34928	Metrosideros polymorpha	34	1	0	native	NA	1	10	23.6
Hawai'i Island	71	PACN_Hawaii	1000	-155.592	19.255	2011	1	35553	Cheirodendron trigynum	6	1	0	native	NA	1	10	11.7
Hawai'i Island	71	PACN_Hawaii	1000	-155.592	19.255	2011	1	35518	Cheirodendron trigynum	6	1	0	native	NA	1	10	15.5
Hawai'i Island	71	PACN_Hawaii	1000	-155.592	19.255	2011	1	35560	Cheirodendron trigynum	6	1	0	native	NA	1	10	20.2
Hawai'i Island	71	PACN_Hawaii	1000	-155.592	19.255	2011	1	35552	Cheirodendron trigynum	6	1	0	native	NA	1	10	11
Hawai'i Island	71	PACN_Hawaii	1000	-155.592	19.255	2011	1	35568	Cheirodendron trigynum	6	1	0	native	NA	1	10	12.5
Hawai'i Island	71	PACN_Hawaii	1000	-155.592	19.255	2011	1	35590	Cheirodendron trigynum	6	1	0	native	NA	1	40	NA
Hawai'i Island	71	PACN_Hawaii	1000	-155.592	19.255	2011	1	35513	Cibotium glaucum	14	0	0	native	NA	1	40	23.5
Hawai'i Island	71	PACN_Hawaii	1000	-155.592	19.255	2011	1	35509	Cibotium glaucum	14	0	0	native	NA	1	40	26.5
Hawai'i Island	71	PACN_Hawaii	1000	-155.592	19.255	2011	1	35510	Cibotium glaucum	14	0	0	native	NA	1	40	25.4
Hawai'i Island	71	PACN_Hawaii	1000	-155.592	19.255	2011	1	35512	Cibotium glaucum	14	0	0	native	NA	1	40	25.5
Hawai'i Island	71	PACN_Hawaii	1000	-155.592	19.255	2011	1	35525	Cibotium glaucum	14	0	0	native	NA	1	40	24
Hawai'i Island	71	PACN_Hawaii	1000	-155.592	19.255	2011	1	35546	Cibotium glaucum	14	0	0	native	NA	1	40	25
Hawai'i Island	71	PACN_Hawaii	1000	-155.592	19.255	2011	1	35545	Cibotium glaucum	14	0	0	native	NA	1	40	21
Hawai'i Island	71	PACN_Hawaii	1000	-155.592	19.255	2011	1	35531	Coprosma spp.	47	1	0	native	NA	1	10	13.6
Hawai'i Island	71	PACN_Hawaii	1000	-155.592	19.255	2011	1	35547	Ilex anomala	5	1	0	native	NA	1	10	42.3
Hawai'i Island	71	PACN_Hawaii	1000	-155.592	19.255	2011	1	35542	Ilex anomala	5	1	0	native	NA	1	10	15.4
Hawai'i Island	71	PACN_Hawaii	1000	-155.592	19.255	2011	1	35541	Ilex anomala	5	1	0	native	NA	1	10	12.4
Hawai'i Island	71	PACN_Hawaii	1000	-155.592	19.255	2011	1	35554	Ilex anomala	5	1	0	native	NA	1	10	30.5
Hawai'i Island	71	PACN_Hawaii	1000	-155.592	19.255	2011	1	35532	Ilex anomala	5	1	0	native	NA	1	10	12.1
Hawai'i Island	71	PACN_Hawaii	1000	-155.592	19.255	2011	1	35536	Ilex anomala	5	1	0	native	NA	1	10	20.9
Hawai'i Island	71	PACN_Hawaii	1000	-155.592	19.255	2011	1	35537	Ilex anomala	5	1	0	native	NA	1	10	23.2
Hawai'i Island	71	PACN_Hawaii	1000	-155.592	19.255	2011	1	35514	Ilex anomala	5	1	0	native	NA	1	10	37.5
Hawai'i Island	71	PACN_Hawaii	1000	-155.592	19.255	2011	1	35564	Ilex anomala	5	1	0	native	NA	1	10	12.3
Hawai'i Island	71	PACN_Hawaii	1000	-155.592	19.255	2011	1	35569	Ilex anomala	5	1	0	native	NA	1	10	15.9
Hawai'i Island	71	PACN_Hawaii	1000	-155.592	19.255	2011	1	35529	Ilex anomala	5	1	0	native	NA	1	10	43.5
Hawai'i Island	71	PACN_Hawaii	1000	-155.592	19.255	2011	1	35563	Ilex anomala	5	1	0	native	NA	1	10	20.8
Hawai'i Island	71	PACN_Hawaii	1000	-155.592	19.255	2011	1	35571	Ilex anomala	5	1	0	native	NA	1	10	38.5
Hawai'i Island	71	PACN_Hawaii	1000	-155.592	19.255	2011	1	35578	Ilex anomala	5	1	0	native	NA	1	40	NA
Hawai'i Island	71	PACN_Hawaii	1000	-155.592	19.255	2011	1	35522	Ilex anomala	5	1	0	native	NA	1	10	17.4
Hawai'i Island	71	PACN_Hawaii	1000	-155.592	19.255	2011	1	35519	Ilex anomala	5	1	0	native	NA	1	10	15.5
Hawai'i Island	71	PACN_Hawaii	1000	-155.592	19.255	2011	1	35524	Ilex anomala	5	1	0	native	NA	1	10	10
Hawai'i Island	71	PACN_Hawaii	1000	-155.592	19.255	2011	1	35523	Ilex anomala	5	1	0	native	NA	1	10	36.3
Hawai'i Island	71	PACN_Hawaii	1000	-155.592	19.255	2011	1	35521	Ilex anomala	5	1	0	native	NA	1	10	14.4
Hawai'i Island	71	PACN_Hawaii	1000	-155.592	19.255	2011	1	35562	Kadua affinis	47	1	0	native	NA	1	10	12.2
Hawai'i Island	71	PACN_Hawaii	1000	-155.592	19.255	2011	1	35511	Metrosideros polymorpha	34	1	0	native	NA	1	10	65.1
Hawai'i Island	71	PACN_Hawaii	1000	-155.592	19.255	2011	1	35516	Metrosideros polymorpha	34	1	0	native	NA	1	10	15.7
Hawai'i Island	71	PACN_Hawaii	1000	-155.592	19.255	2011	1	35517	Metrosideros polymorpha	34	1	0	native	NA	1	10	25
Hawai'i Island	71	PACN_Hawaii	1000	-155.592	19.255	2011	1	35528	Metrosideros polymorpha	34	1	0	native	NA	1	10	14.4
Hawai'i Island	71	PACN_Hawaii	1000	-155.592	19.255	2011	1	35533	Metrosideros polymorpha	34	1	0	native	NA	1	10	33.4
Hawai'i Island	71	PACN_Hawaii	1000	-155.592	19.255	2011	1	35535	Metrosideros polymorpha	34	1	0	native	NA	1	10	26.5
Hawai'i Island	71	PACN_Hawaii	1000	-155.592	19.255	2011	1	35543	Metrosideros polymorpha	34	1	0	native	NA	1	10	13.6
Hawai'i Island	71	PACN_Hawaii	1000	-155.592	19.255	2011	1	35549	Metrosideros polymorpha	34	1	0	native	NA	1	10	30.9
Hawai'i Island	71	PACN_Hawaii	1000	-155.592	19.255	2011	1	35556	Metrosideros polymorpha	34	1	0	native	NA	1	10	29.1
Hawai'i Island	71	PACN_Hawaii	1000	-155.592	19.255	2011	1	35584	Metrosideros polymorpha	34	1	0	native	NA	1	40	NA
Hawai'i Island	71	PACN_Hawaii	1000	-155.592	19.255	2011	1	35586	Metrosideros polymorpha	34	1	0	native	NA	1	40	NA
Hawai'i Island	71	PACN_Hawaii	1000	-155.592	19.255	2011	1	35559	Metrosideros polymorpha	34	1	0	native	NA	1	10	131.1
Hawai'i Island	71	PACN_Hawaii	1000	-155.592	19.255	2011	1	35579	Metrosideros polymorpha	34	1	0	native	NA	1	40	NA
Hawai'i Island	71	PACN_Hawaii	1000	-155.592	19.255	2011	1	35585	Metrosideros polymorpha	34	1	0	native	NA	1	40	NA
Hawai'i Island	71	PACN_Hawaii	1000	-155.592	19.255	2011	1	35551	Metrosideros polymorpha	34	1	0	native	NA	1	10	63.1
Hawai'i Island	71	PACN_Hawaii	1000	-155.592	19.255	2011	1	35557	Metrosideros polymorpha	34	1	0	native	NA	1	10	17
Hawai'i Island	71	PACN_Hawaii	1000	-155.592	19.255	2011	1	35558	Metrosideros polymorpha	34	1	0	native	NA	1	10	18.6
Hawai'i Island	71	PACN_Hawaii	1000	-155.592	19.255	2011	1	35587	Metrosideros polymorpha	34	1	0	native	NA	1	40	NA
Hawai'i Island	71	PACN_Hawaii	1000	-155.592	19.255	2011	1	35544	Metrosideros polymorpha	34	1	0	native	NA	1	10	22.9
Hawai'i Island	71	PACN_Hawaii	1000	-155.592	19.255	2011	1	35515	Metrosideros polymorpha	34	1	0	native	NA	1	10	37.5
Hawai'i Island	71	PACN_Hawaii	1000	-155.592	19.255	2011	1	35520	Metrosideros polymorpha	34	1	0	native	NA	1	10	27.8
Hawai'i Island	71	PACN_Hawaii	1000	-155.592	19.255	2011	1	35526	Metrosideros polymorpha	34	1	0	native	NA	1	10	44.9
Hawai'i Island	71	PACN_Hawaii	1000	-155.592	19.255	2011	1	35527	Metrosideros polymorpha	34	1	0	native	NA	1	10	10
Hawai'i Island	71	PACN_Hawaii	1000	-155.592	19.255	2011	1	35530	Metrosideros polymorpha	34	1	0	native	NA	1	10	10.3
Hawai'i Island	71	PACN_Hawaii	1000	-155.592	19.255	2011	1	35538	Metrosideros polymorpha	34	1	0	native	NA	1	10	15.5
Hawai'i Island	71	PACN_Hawaii	1000	-155.592	19.255	2011	1	35540	Metrosideros polymorpha	34	1	0	native	NA	1	10	52.3
Hawai'i Island	71	PACN_Hawaii	1000	-155.592	19.255	2011	1	35548	Metrosideros polymorpha	34	1	0	native	NA	1	10	25.2
Hawai'i Island	71	PACN_Hawaii	1000	-155.592	19.255	2011	1	35561	Metrosideros polymorpha	34	1	0	native	NA	1	10	13.8
Hawai'i Island	71	PACN_Hawaii	1000	-155.592	19.255	2011	1	35566	Metrosideros polymorpha	34	1	0	native	NA	1	10	29.5
Hawai'i Island	71	PACN_Hawaii	1000	-155.592	19.255	2011	1	35572	Metrosideros polymorpha	34	1	0	native	NA	1	40	NA
Hawai'i Island	71	PACN_Hawaii	1000	-155.592	19.255	2011	1	35573	Metrosideros polymorpha	34	1	0	native	NA	1	40	NA
Hawai'i Island	71	PACN_Hawaii	1000	-155.592	19.255	2011	1	35577	Metrosideros polymorpha	34	1	0	native	NA	1	40	NA
Hawai'i Island	71	PACN_Hawaii	1000	-155.592	19.255	2011	1	35550	Metrosideros polymorpha	34	1	0	native	NA	1	10	62.8
Hawai'i Island	71	PACN_Hawaii	1000	-155.592	19.255	2011	1	35567	Metrosideros polymorpha	34	1	0	native	NA	1	10	28.7
Hawai'i Island	71	PACN_Hawaii	1000	-155.592	19.255	2011	1	35539	Metrosideros polymorpha	34	1	0	native	NA	1	10	14.5
Hawai'i Island	71	PACN_Hawaii	1000	-155.592	19.255	2011	1	35574	Metrosideros polymorpha	34	1	0	native	NA	1	40	NA
Hawai'i Island	71	PACN_Hawaii	1000	-155.592	19.255	2011	1	35565	Metrosideros polymorpha	34	1	0	native	NA	1	10	16.4
Hawai'i Island	71	PACN_Hawaii	1000	-155.592	19.255	2011	1	35534	Myrsine lessertiana	43	1	0	native	NA	1	10	13.4
Hawai'i Island	71	PACN_Hawaii	1000	-155.592	19.255	2011	1	35555	Myrsine lessertiana	43	1	0	native	NA	1	10	11.9
Hawai'i Island	71	PACN_Hawaii	1000	-155.592	19.255	2011	1	35570	Myrsine sandwicensis	43	1	0	native	NA	1	10	17.3
Hawai'i Island	72	PACN_Hawaii	1000	-155.684	19.143	2011	1	36567	Coprosma spp.	47	1	0	native	NA	1	10	19.2
Hawai'i Island	72	PACN_Hawaii	1000	-155.684	19.143	2011	1	36565	Metrosideros polymorpha	34	1	0	native	NA	1	10	63
Hawai'i Island	72	PACN_Hawaii	1000	-155.684	19.143	2011	1	36566	Metrosideros polymorpha	34	1	0	native	NA	1	10	54
Hawai'i Island	72	PACN_Hawaii	1000	-155.684	19.143	2011	1	36568	Metrosideros polymorpha	34	1	0	native	NA	1	10	33.5
Hawai'i Island	72	PACN_Hawaii	1000	-155.684	19.143	2011	1	36569	Metrosideros polymorpha	34	1	0	native	NA	1	10	23.3
Hawai'i Island	72	PACN_Hawaii	1000	-155.684	19.143	2011	1	36570	Metrosideros polymorpha	34	1	0	native	NA	1	10	15.3
Hawai'i Island	72	PACN_Hawaii	1000	-155.684	19.143	2011	1	36571	Metrosideros polymorpha	34	1	0	native	NA	1	10	24.5
Hawai'i Island	72	PACN_Hawaii	1000	-155.684	19.143	2011	1	36572	Metrosideros polymorpha	34	1	0	native	NA	1	10	71
Hawai'i Island	73	PACN_Hawaii	1000	-155.68	19.122	2011	1	36440	Cheirodendron trigynum	6	1	0	native	NA	1	10	19.3
Hawai'i Island	73	PACN_Hawaii	1000	-155.68	19.122	2011	1	36439	Cheirodendron trigynum	6	1	0	native	NA	1	10	27.6
Hawai'i Island	73	PACN_Hawaii	1000	-155.68	19.122	2011	1	36430	Cheirodendron trigynum	6	1	0	native	NA	1	10	24.5
Hawai'i Island	73	PACN_Hawaii	1000	-155.68	19.122	2011	1	36453	Cheirodendron trigynum	6	1	0	native	NA	1	10	22.6
Hawai'i Island	73	PACN_Hawaii	1000	-155.68	19.122	2011	1	36425	Cheirodendron trigynum	6	1	0	native	NA	1	10	41.6
Hawai'i Island	73	PACN_Hawaii	1000	-155.68	19.122	2011	1	36452	Cheirodendron trigynum	6	1	0	native	NA	1	10	34.3
Hawai'i Island	73	PACN_Hawaii	1000	-155.68	19.122	2011	1	36431	Cibotium glaucum	14	0	0	native	NA	1	40	17
Hawai'i Island	73	PACN_Hawaii	1000	-155.68	19.122	2011	1	36432	Cibotium glaucum	14	0	0	native	NA	1	40	32
Hawai'i Island	73	PACN_Hawaii	1000	-155.68	19.122	2011	1	36447	Cibotium glaucum	14	0	0	native	NA	1	40	32
Hawai'i Island	73	PACN_Hawaii	1000	-155.68	19.122	2011	1	36444	Cibotium glaucum	14	0	0	native	NA	1	40	22
Hawai'i Island	73	PACN_Hawaii	1000	-155.68	19.122	2011	1	36446	Cibotium glaucum	14	0	0	native	NA	1	40	25
Hawai'i Island	73	PACN_Hawaii	1000	-155.68	19.122	2011	1	36436	Metrosideros polymorpha	34	1	0	native	NA	1	10	10.1
Hawai'i Island	73	PACN_Hawaii	1000	-155.68	19.122	2011	1	36441	Metrosideros polymorpha	34	1	0	native	NA	1	10	36.8
Hawai'i Island	73	PACN_Hawaii	1000	-155.68	19.122	2011	1	36445	Metrosideros polymorpha	34	1	0	native	NA	1	10	14.4
Hawai'i Island	73	PACN_Hawaii	1000	-155.68	19.122	2011	1	36462	Metrosideros polymorpha	34	1	0	native	NA	1	40	NA
Hawai'i Island	73	PACN_Hawaii	1000	-155.68	19.122	2011	1	36427	Metrosideros polymorpha	34	1	0	native	NA	1	10	17.6
Hawai'i Island	73	PACN_Hawaii	1000	-155.68	19.122	2011	1	36429	Metrosideros polymorpha	34	1	0	native	NA	1	10	36.4
Hawai'i Island	73	PACN_Hawaii	1000	-155.68	19.122	2011	1	36435	Metrosideros polymorpha	34	1	0	native	NA	1	10	13.7
Hawai'i Island	73	PACN_Hawaii	1000	-155.68	19.122	2011	1	36438	Metrosideros polymorpha	34	1	0	native	NA	1	10	18.2
Hawai'i Island	73	PACN_Hawaii	1000	-155.68	19.122	2011	1	36443	Metrosideros polymorpha	34	1	0	native	NA	1	10	10.7
Hawai'i Island	73	PACN_Hawaii	1000	-155.68	19.122	2011	1	36448	Metrosideros polymorpha	34	1	0	native	NA	1	10	18.8
Hawai'i Island	73	PACN_Hawaii	1000	-155.68	19.122	2011	1	36454	Metrosideros polymorpha	34	1	0	native	NA	1	10	44.2
Hawai'i Island	73	PACN_Hawaii	1000	-155.68	19.122	2011	1	36456	Metrosideros polymorpha	34	1	0	native	NA	1	40	NA
Hawai'i Island	73	PACN_Hawaii	1000	-155.68	19.122	2011	1	36457	Metrosideros polymorpha	34	1	0	native	NA	1	40	NA
Hawai'i Island	73	PACN_Hawaii	1000	-155.68	19.122	2011	1	36459	Metrosideros polymorpha	34	1	0	native	NA	1	40	NA
Hawai'i Island	73	PACN_Hawaii	1000	-155.68	19.122	2011	1	36426	Metrosideros polymorpha	34	1	0	native	NA	1	10	12
Hawai'i Island	73	PACN_Hawaii	1000	-155.68	19.122	2011	1	36428	Metrosideros polymorpha	34	1	0	native	NA	1	10	24
Hawai'i Island	73	PACN_Hawaii	1000	-155.68	19.122	2011	1	36433	Metrosideros polymorpha	34	1	0	native	NA	1	10	12.5
Hawai'i Island	73	PACN_Hawaii	1000	-155.68	19.122	2011	1	36434	Metrosideros polymorpha	34	1	0	native	NA	1	10	69.8
Hawai'i Island	73	PACN_Hawaii	1000	-155.68	19.122	2011	1	36442	Metrosideros polymorpha	34	1	0	native	NA	1	10	26
Hawai'i Island	73	PACN_Hawaii	1000	-155.68	19.122	2011	1	36450	Metrosideros polymorpha	34	1	0	native	NA	1	10	10.3
Hawai'i Island	73	PACN_Hawaii	1000	-155.68	19.122	2011	1	36451	Metrosideros polymorpha	34	1	0	native	NA	1	10	11.1
Hawai'i Island	73	PACN_Hawaii	1000	-155.68	19.122	2011	1	36461	Metrosideros polymorpha	34	1	0	native	NA	1	40	NA
Hawai'i Island	73	PACN_Hawaii	1000	-155.68	19.122	2011	1	36458	Metrosideros polymorpha	34	1	0	native	NA	1	40	NA
Hawai'i Island	73	PACN_Hawaii	1000	-155.68	19.122	2011	1	36449	Metrosideros polymorpha	34	1	0	native	NA	1	10	16.4
Hawai'i Island	73	PACN_Hawaii	1000	-155.68	19.122	2011	1	36437	Myrsine lessertiana	43	1	0	native	NA	1	10	10.2
Hawai'i Island	73	PACN_Hawaii	1000	-155.68	19.122	2011	1	36455	Perrottetia sandwicensis	20	1	0	native	NA	1	10	11.8
Hawai'i Island	74	PACN_Hawaii	1000	-155.679	19.104	2011	1	36401	Cibotium glaucum	14	0	0	native	NA	1	40	14.8
Hawai'i Island	74	PACN_Hawaii	1000	-155.679	19.104	2011	1	36397	Cibotium glaucum	14	0	0	native	NA	1	40	26
Hawai'i Island	74	PACN_Hawaii	1000	-155.679	19.104	2011	1	36394	Cibotium glaucum	14	0	0	native	NA	1	40	21.6
Hawai'i Island	74	PACN_Hawaii	1000	-155.679	19.104	2011	1	36399	Cibotium glaucum	14	0	0	native	NA	1	40	12
Hawai'i Island	74	PACN_Hawaii	1000	-155.679	19.104	2011	1	36388	Metrosideros polymorpha	34	1	0	native	NA	1	10	10.9
Hawai'i Island	74	PACN_Hawaii	1000	-155.679	19.104	2011	1	36390	Metrosideros polymorpha	34	1	0	native	NA	1	10	34
Hawai'i Island	74	PACN_Hawaii	1000	-155.679	19.104	2011	1	36392	Metrosideros polymorpha	34	1	0	native	NA	1	10	12.1
Hawai'i Island	74	PACN_Hawaii	1000	-155.679	19.104	2011	1	36395	Metrosideros polymorpha	34	1	0	native	NA	1	10	26
Hawai'i Island	74	PACN_Hawaii	1000	-155.679	19.104	2011	1	36389	Metrosideros polymorpha	34	1	0	native	NA	1	10	87.9
Hawai'i Island	74	PACN_Hawaii	1000	-155.679	19.104	2011	1	36391	Metrosideros polymorpha	34	1	0	native	NA	1	10	34.7
Hawai'i Island	74	PACN_Hawaii	1000	-155.679	19.104	2011	1	36393	Metrosideros polymorpha	34	1	0	native	NA	1	10	10.9
Hawai'i Island	74	PACN_Hawaii	1000	-155.679	19.104	2011	1	36396	Metrosideros polymorpha	34	1	0	native	NA	1	10	55.3
Hawai'i Island	74	PACN_Hawaii	1000	-155.679	19.104	2011	1	36398	Metrosideros polymorpha	34	1	0	native	NA	1	10	39.8
Hawai'i Island	74	PACN_Hawaii	1000	-155.679	19.104	2011	1	36400	Metrosideros polymorpha	34	1	0	native	NA	1	10	19
Hawai'i Island	74	PACN_Hawaii	1000	-155.679	19.104	2011	1	36402	Metrosideros polymorpha	34	1	0	native	NA	1	40	NA
Hawai'i Island	74	PACN_Hawaii	1000	-155.679	19.104	2011	1	36410	Metrosideros polymorpha	34	1	0	native	NA	1	40	NA
Hawai'i Island	74	PACN_Hawaii	1000	-155.679	19.104	2011	1	36405	Perrottetia sandwicensis	20	1	0	native	NA	1	40	NA
Hawai'i Island	75	PACN_Hawaii	1000	-155.681	19.124	2011	1	36478	Cheirodendron trigynum	6	1	0	native	NA	1	10	28.1
Hawai'i Island	75	PACN_Hawaii	1000	-155.681	19.124	2011	1	36508	Cheirodendron trigynum	6	1	0	native	NA	1	10	10.8
Hawai'i Island	75	PACN_Hawaii	1000	-155.681	19.124	2011	1	36506	Cheirodendron trigynum	6	1	0	native	NA	1	10	20.3
Hawai'i Island	75	PACN_Hawaii	1000	-155.681	19.124	2011	1	36503	Cheirodendron trigynum	6	1	0	native	NA	1	10	15.3
Hawai'i Island	75	PACN_Hawaii	1000	-155.681	19.124	2011	1	36541	Cheirodendron trigynum	6	1	0	native	NA	1	40	NA
Hawai'i Island	75	PACN_Hawaii	1000	-155.681	19.124	2011	1	36501	Cheirodendron trigynum	6	1	0	native	NA	1	10	29
Hawai'i Island	75	PACN_Hawaii	1000	-155.681	19.124	2011	1	36498	Cheirodendron trigynum	6	1	0	native	NA	1	10	10.2
Hawai'i Island	75	PACN_Hawaii	1000	-155.681	19.124	2011	1	36502	Cheirodendron trigynum	6	1	0	native	NA	1	10	21.4
Hawai'i Island	75	PACN_Hawaii	1000	-155.681	19.124	2011	1	36484	Cheirodendron trigynum	6	1	0	native	NA	1	10	11
Hawai'i Island	75	PACN_Hawaii	1000	-155.681	19.124	2011	1	36499	Cheirodendron trigynum	6	1	0	native	NA	1	10	27.7
Hawai'i Island	75	PACN_Hawaii	1000	-155.681	19.124	2011	1	36497	Cheirodendron trigynum	6	1	0	native	NA	1	10	37.2
Hawai'i Island	75	PACN_Hawaii	1000	-155.681	19.124	2011	1	36492	Cheirodendron trigynum	6	1	0	native	NA	1	10	25.3
Hawai'i Island	75	PACN_Hawaii	1000	-155.681	19.124	2011	1	36483	Cheirodendron trigynum	6	1	0	native	NA	1	10	35.2
Hawai'i Island	75	PACN_Hawaii	1000	-155.681	19.124	2011	1	36482	Cibotium spp.	14	0	0	native	NA	1	40	24
Hawai'i Island	75	PACN_Hawaii	1000	-155.681	19.124	2011	1	36477	Metrosideros polymorpha	34	1	0	native	NA	1	10	11.3
Hawai'i Island	75	PACN_Hawaii	1000	-155.681	19.124	2011	1	36479	Metrosideros polymorpha	34	1	0	native	NA	1	10	125
Hawai'i Island	75	PACN_Hawaii	1000	-155.681	19.124	2011	1	36480	Metrosideros polymorpha	34	1	0	native	NA	1	10	24
Hawai'i Island	75	PACN_Hawaii	1000	-155.681	19.124	2011	1	36481	Metrosideros polymorpha	34	1	0	native	NA	1	10	22.5
Hawai'i Island	75	PACN_Hawaii	1000	-155.681	19.124	2011	1	36488	Metrosideros polymorpha	34	1	0	native	NA	1	10	14.3
Hawai'i Island	75	PACN_Hawaii	1000	-155.681	19.124	2011	1	36489	Metrosideros polymorpha	34	1	0	native	NA	1	10	23.9
Hawai'i Island	75	PACN_Hawaii	1000	-155.681	19.124	2011	1	36491	Metrosideros polymorpha	34	1	0	native	NA	1	10	13.2
Hawai'i Island	75	PACN_Hawaii	1000	-155.681	19.124	2011	1	36494	Metrosideros polymorpha	34	1	0	native	NA	1	10	39.8
Hawai'i Island	75	PACN_Hawaii	1000	-155.681	19.124	2011	1	36496	Metrosideros polymorpha	34	1	0	native	NA	1	10	14.6
Hawai'i Island	75	PACN_Hawaii	1000	-155.681	19.124	2011	1	36500	Metrosideros polymorpha	34	1	0	native	NA	1	10	27.1
Hawai'i Island	75	PACN_Hawaii	1000	-155.681	19.124	2011	1	36505	Metrosideros polymorpha	34	1	0	native	NA	1	10	40.3
Hawai'i Island	75	PACN_Hawaii	1000	-155.681	19.124	2011	1	36507	Metrosideros polymorpha	34	1	0	native	NA	1	10	10.8
Hawai'i Island	75	PACN_Hawaii	1000	-155.681	19.124	2011	1	36510	Metrosideros polymorpha	34	1	0	native	NA	1	10	54.7
Hawai'i Island	75	PACN_Hawaii	1000	-155.681	19.124	2011	1	36511	Metrosideros polymorpha	34	1	0	native	NA	1	10	11.3
Hawai'i Island	75	PACN_Hawaii	1000	-155.681	19.124	2011	1	36544	Metrosideros polymorpha	34	1	0	native	NA	1	40	NA
Hawai'i Island	75	PACN_Hawaii	1000	-155.681	19.124	2011	1	36548	Metrosideros polymorpha	34	1	0	native	NA	1	40	NA
Hawai'i Island	75	PACN_Hawaii	1000	-155.681	19.124	2011	1	36549	Metrosideros polymorpha	34	1	0	native	NA	1	40	NA
Hawai'i Island	75	PACN_Hawaii	1000	-155.681	19.124	2011	1	36490	Metrosideros polymorpha	34	1	0	native	NA	1	10	32.5
Hawai'i Island	75	PACN_Hawaii	1000	-155.681	19.124	2011	1	36537	Metrosideros polymorpha	34	1	0	native	NA	1	40	NA
Hawai'i Island	75	PACN_Hawaii	1000	-155.681	19.124	2011	1	36485	Metrosideros polymorpha	34	1	0	native	NA	1	10	20.9
Hawai'i Island	75	PACN_Hawaii	1000	-155.681	19.124	2011	1	36486	Metrosideros polymorpha	34	1	0	native	NA	1	10	23.4
Hawai'i Island	75	PACN_Hawaii	1000	-155.681	19.124	2011	1	36487	Metrosideros polymorpha	34	1	0	native	NA	1	10	15.6
Hawai'i Island	75	PACN_Hawaii	1000	-155.681	19.124	2011	1	36493	Metrosideros polymorpha	34	1	0	native	NA	1	10	15.3
Hawai'i Island	75	PACN_Hawaii	1000	-155.681	19.124	2011	1	36495	Metrosideros polymorpha	34	1	0	native	NA	1	10	100
Hawai'i Island	75	PACN_Hawaii	1000	-155.681	19.124	2011	1	36504	Metrosideros polymorpha	34	1	0	native	NA	1	10	10.6
Hawai'i Island	75	PACN_Hawaii	1000	-155.681	19.124	2011	1	36509	Metrosideros polymorpha	34	1	0	native	NA	1	10	26.8
Hawai'i Island	75	PACN_Hawaii	1000	-155.681	19.124	2011	1	36542	Metrosideros polymorpha	34	1	0	native	NA	1	40	NA
Hawai'i Island	76	PACN_Hawaii	1000	-155.68	19.108	2011	1	36415	Cibotium glaucum	14	0	0	native	NA	1	40	32.5
Hawai'i Island	76	PACN_Hawaii	1000	-155.68	19.108	2011	1	36414	Metrosideros polymorpha	34	1	0	native	NA	1	10	53.2
Hawai'i Island	76	PACN_Hawaii	1000	-155.68	19.108	2011	1	36420	Metrosideros polymorpha	34	1	0	native	NA	1	10	68.2
Hawai'i Island	76	PACN_Hawaii	1000	-155.68	19.108	2011	1	36416	Metrosideros polymorpha	34	1	0	native	NA	1	10	10.6
Hawai'i Island	76	PACN_Hawaii	1000	-155.68	19.108	2011	1	36417	Metrosideros polymorpha	34	1	0	native	NA	1	10	32.7
Hawai'i Island	76	PACN_Hawaii	1000	-155.68	19.108	2011	1	36418	Metrosideros polymorpha	34	1	0	native	NA	1	10	21.4
Hawai'i Island	76	PACN_Hawaii	1000	-155.68	19.108	2011	1	36419	Metrosideros polymorpha	34	1	0	native	NA	1	10	41.6
Hawai'i Island	76	PACN_Hawaii	1000	-155.68	19.108	2011	1	36421	Metrosideros polymorpha	34	1	0	native	NA	1	10	29.9
Hawai'i Island	76	PACN_Hawaii	1000	-155.68	19.108	2011	1	36422	Metrosideros polymorpha	34	1	0	native	NA	1	10	11.3
Hawai'i Island	77	PACN_Hawaii	1000	-155.682	19.133	2011	1	36556	Cheirodendron trigynum	6	1	0	native	NA	1	10	40
Hawai'i Island	77	PACN_Hawaii	1000	-155.682	19.133	2011	1	36552	Cheirodendron trigynum	6	1	0	native	NA	1	10	19.4
Hawai'i Island	77	PACN_Hawaii	1000	-155.682	19.133	2011	1	36555	Cheirodendron trigynum	6	1	0	native	NA	1	10	67
Hawai'i Island	77	PACN_Hawaii	1000	-155.682	19.133	2011	1	36550	Metrosideros polymorpha	34	1	0	native	NA	1	10	10.1
Hawai'i Island	77	PACN_Hawaii	1000	-155.682	19.133	2011	1	36553	Metrosideros polymorpha	34	1	0	native	NA	1	10	29.8
Hawai'i Island	77	PACN_Hawaii	1000	-155.682	19.133	2011	1	36554	Metrosideros polymorpha	34	1	0	native	NA	1	10	42.7
Hawai'i Island	77	PACN_Hawaii	1000	-155.682	19.133	2011	1	36557	Metrosideros polymorpha	34	1	0	native	NA	1	10	118
Hawai'i Island	77	PACN_Hawaii	1000	-155.682	19.133	2011	1	36551	Metrosideros polymorpha	34	1	0	native	NA	1	10	17.6
Hawai'i Island	78	PACN_Hawaii	1000	-155.58	19.266	2011	1	35391	Cheirodendron trigynum	6	1	0	native	NA	1	10	19.6
Hawai'i Island	78	PACN_Hawaii	1000	-155.58	19.266	2011	1	35339	Cheirodendron trigynum	6	1	0	native	NA	1	10	11.5
Hawai'i Island	78	PACN_Hawaii	1000	-155.58	19.266	2011	1	35412	Cheirodendron trigynum	6	1	0	native	NA	1	40	NA
Hawai'i Island	78	PACN_Hawaii	1000	-155.58	19.266	2011	1	35369	Cheirodendron trigynum	6	1	0	native	NA	1	10	10.5
Hawai'i Island	78	PACN_Hawaii	1000	-155.58	19.266	2011	1	35408	Cheirodendron trigynum	6	1	0	native	NA	1	40	NA
Hawai'i Island	78	PACN_Hawaii	1000	-155.58	19.266	2011	1	35340	Ilex anomala	5	1	0	native	NA	1	10	25.5
Hawai'i Island	78	PACN_Hawaii	1000	-155.58	19.266	2011	1	35389	Ilex anomala	5	1	0	native	NA	1	10	36.7
Hawai'i Island	78	PACN_Hawaii	1000	-155.58	19.266	2011	1	35377	Ilex anomala	5	1	0	native	NA	1	10	26.5
Hawai'i Island	78	PACN_Hawaii	1000	-155.58	19.266	2011	1	35376	Ilex anomala	5	1	0	native	NA	1	10	29.1
Hawai'i Island	78	PACN_Hawaii	1000	-155.58	19.266	2011	1	35370	Ilex anomala	5	1	0	native	NA	1	10	11
Hawai'i Island	78	PACN_Hawaii	1000	-155.58	19.266	2011	1	35366	Ilex anomala	5	1	0	native	NA	1	10	51.2
Hawai'i Island	78	PACN_Hawaii	1000	-155.58	19.266	2011	1	35397	Ilex anomala	5	1	0	native	NA	1	10	32
Hawai'i Island	78	PACN_Hawaii	1000	-155.58	19.266	2011	1	35343	Ilex anomala	5	1	0	native	NA	1	10	30.4
Hawai'i Island	78	PACN_Hawaii	1000	-155.58	19.266	2011	1	35360	Ilex anomala	5	1	0	native	NA	1	10	25.6
Hawai'i Island	78	PACN_Hawaii	1000	-155.58	19.266	2011	1	35355	Ilex anomala	5	1	0	native	NA	1	10	13.5
Hawai'i Island	78	PACN_Hawaii	1000	-155.58	19.266	2011	1	35335	Metrosideros polymorpha	34	1	0	native	NA	1	10	93.3
Hawai'i Island	78	PACN_Hawaii	1000	-155.58	19.266	2011	1	35336	Metrosideros polymorpha	34	1	0	native	NA	1	10	26.4
Hawai'i Island	78	PACN_Hawaii	1000	-155.58	19.266	2011	1	35337	Metrosideros polymorpha	34	1	0	native	NA	1	10	21.6
Hawai'i Island	78	PACN_Hawaii	1000	-155.58	19.266	2011	1	35341	Metrosideros polymorpha	34	1	0	native	NA	1	10	39.2
Hawai'i Island	78	PACN_Hawaii	1000	-155.58	19.266	2011	1	35344	Metrosideros polymorpha	34	1	0	native	NA	1	10	16.6
Hawai'i Island	78	PACN_Hawaii	1000	-155.58	19.266	2011	1	35345	Metrosideros polymorpha	34	1	0	native	NA	1	10	29.4
Hawai'i Island	78	PACN_Hawaii	1000	-155.58	19.266	2011	1	35352	Metrosideros polymorpha	34	1	0	native	NA	1	10	53.5
Hawai'i Island	78	PACN_Hawaii	1000	-155.58	19.266	2011	1	35357	Metrosideros polymorpha	34	1	0	native	NA	1	10	35.8
Hawai'i Island	78	PACN_Hawaii	1000	-155.58	19.266	2011	1	35359	Metrosideros polymorpha	34	1	0	native	NA	1	10	17.9
Hawai'i Island	78	PACN_Hawaii	1000	-155.58	19.266	2011	1	35362	Metrosideros polymorpha	34	1	0	native	NA	1	10	38
Hawai'i Island	78	PACN_Hawaii	1000	-155.58	19.266	2011	1	35363	Metrosideros polymorpha	34	1	0	native	NA	1	10	25
Hawai'i Island	78	PACN_Hawaii	1000	-155.58	19.266	2011	1	35364	Metrosideros polymorpha	34	1	0	native	NA	1	10	65.5
Hawai'i Island	78	PACN_Hawaii	1000	-155.58	19.266	2011	1	35365	Metrosideros polymorpha	34	1	0	native	NA	1	10	16.9
Hawai'i Island	78	PACN_Hawaii	1000	-155.58	19.266	2011	1	35367	Metrosideros polymorpha	34	1	0	native	NA	1	10	16
Hawai'i Island	78	PACN_Hawaii	1000	-155.58	19.266	2011	1	35368	Metrosideros polymorpha	34	1	0	native	NA	1	10	16.7
Hawai'i Island	78	PACN_Hawaii	1000	-155.58	19.266	2011	1	35372	Metrosideros polymorpha	34	1	0	native	NA	1	10	13.2
Hawai'i Island	78	PACN_Hawaii	1000	-155.58	19.266	2011	1	35375	Metrosideros polymorpha	34	1	0	native	NA	1	10	87.3
Hawai'i Island	78	PACN_Hawaii	1000	-155.58	19.266	2011	1	35380	Metrosideros polymorpha	34	1	0	native	NA	1	10	15.4
Hawai'i Island	78	PACN_Hawaii	1000	-155.58	19.266	2011	1	35381	Metrosideros polymorpha	34	1	0	native	NA	1	10	28.6
Hawai'i Island	78	PACN_Hawaii	1000	-155.58	19.266	2011	1	35382	Metrosideros polymorpha	34	1	0	native	NA	1	10	29
Hawai'i Island	78	PACN_Hawaii	1000	-155.58	19.266	2011	1	35384	Metrosideros polymorpha	34	1	0	native	NA	1	10	20.8
Hawai'i Island	78	PACN_Hawaii	1000	-155.58	19.266	2011	1	35386	Metrosideros polymorpha	34	1	0	native	NA	1	10	31.6
Hawai'i Island	78	PACN_Hawaii	1000	-155.58	19.266	2011	1	35387	Metrosideros polymorpha	34	1	0	native	NA	1	10	10
Hawai'i Island	78	PACN_Hawaii	1000	-155.58	19.266	2011	1	35388	Metrosideros polymorpha	34	1	0	native	NA	1	10	13.1
Hawai'i Island	78	PACN_Hawaii	1000	-155.58	19.266	2011	1	35393	Metrosideros polymorpha	34	1	0	native	NA	1	10	14.8
Hawai'i Island	78	PACN_Hawaii	1000	-155.58	19.266	2011	1	35395	Metrosideros polymorpha	34	1	0	native	NA	1	10	34.7
Hawai'i Island	78	PACN_Hawaii	1000	-155.58	19.266	2011	1	35396	Metrosideros polymorpha	34	1	0	native	NA	1	10	24.7
Hawai'i Island	78	PACN_Hawaii	1000	-155.58	19.266	2011	1	35398	Metrosideros polymorpha	34	1	0	native	NA	1	10	13
Hawai'i Island	78	PACN_Hawaii	1000	-155.58	19.266	2011	1	35399	Metrosideros polymorpha	34	1	0	native	NA	1	10	28.8
Hawai'i Island	78	PACN_Hawaii	1000	-155.58	19.266	2011	1	35402	Metrosideros polymorpha	34	1	0	native	NA	1	10	14.6
Hawai'i Island	78	PACN_Hawaii	1000	-155.58	19.266	2011	1	35404	Metrosideros polymorpha	34	1	0	native	NA	1	10	51.9
Hawai'i Island	78	PACN_Hawaii	1000	-155.58	19.266	2011	1	35405	Metrosideros polymorpha	34	1	0	native	NA	1	10	27
Hawai'i Island	78	PACN_Hawaii	1000	-155.58	19.266	2011	1	35406	Metrosideros polymorpha	34	1	0	native	NA	1	10	27.5
Hawai'i Island	78	PACN_Hawaii	1000	-155.58	19.266	2011	1	35409	Metrosideros polymorpha	34	1	0	native	NA	1	40	NA
Hawai'i Island	78	PACN_Hawaii	1000	-155.58	19.266	2011	1	35410	Metrosideros polymorpha	34	1	0	native	NA	1	40	NA
Hawai'i Island	78	PACN_Hawaii	1000	-155.58	19.266	2011	1	35413	Metrosideros polymorpha	34	1	0	native	NA	1	40	NA
Hawai'i Island	78	PACN_Hawaii	1000	-155.58	19.266	2011	1	35394	Metrosideros polymorpha	34	1	0	native	NA	1	10	19.5
Hawai'i Island	78	PACN_Hawaii	1000	-155.58	19.266	2011	1	35331	Metrosideros polymorpha	34	1	0	native	NA	1	10	26.2
Hawai'i Island	78	PACN_Hawaii	1000	-155.58	19.266	2011	1	35332	Metrosideros polymorpha	34	1	0	native	NA	1	10	35.4
Hawai'i Island	78	PACN_Hawaii	1000	-155.58	19.266	2011	1	35400	Metrosideros polymorpha	34	1	0	native	NA	1	10	31
Hawai'i Island	78	PACN_Hawaii	1000	-155.58	19.266	2011	1	35333	Metrosideros polymorpha	34	1	0	native	NA	1	10	18
Hawai'i Island	78	PACN_Hawaii	1000	-155.58	19.266	2011	1	35334	Metrosideros polymorpha	34	1	0	native	NA	1	10	22.2
Hawai'i Island	78	PACN_Hawaii	1000	-155.58	19.266	2011	1	35338	Metrosideros polymorpha	34	1	0	native	NA	1	10	74.5
Hawai'i Island	78	PACN_Hawaii	1000	-155.58	19.266	2011	1	35342	Metrosideros polymorpha	34	1	0	native	NA	1	10	16.2
Hawai'i Island	78	PACN_Hawaii	1000	-155.58	19.266	2011	1	35346	Metrosideros polymorpha	34	1	0	native	NA	1	10	26.6
Hawai'i Island	78	PACN_Hawaii	1000	-155.58	19.266	2011	1	35347	Metrosideros polymorpha	34	1	0	native	NA	1	10	57.4
Hawai'i Island	78	PACN_Hawaii	1000	-155.58	19.266	2011	1	35348	Metrosideros polymorpha	34	1	0	native	NA	1	10	10.3
Hawai'i Island	78	PACN_Hawaii	1000	-155.58	19.266	2011	1	35350	Metrosideros polymorpha	34	1	0	native	NA	1	10	30
Hawai'i Island	78	PACN_Hawaii	1000	-155.58	19.266	2011	1	35351	Metrosideros polymorpha	34	1	0	native	NA	1	10	29.5
Hawai'i Island	78	PACN_Hawaii	1000	-155.58	19.266	2011	1	35353	Metrosideros polymorpha	34	1	0	native	NA	1	10	15.3
Hawai'i Island	78	PACN_Hawaii	1000	-155.58	19.266	2011	1	35356	Metrosideros polymorpha	34	1	0	native	NA	1	10	34.3
Hawai'i Island	78	PACN_Hawaii	1000	-155.58	19.266	2011	1	35361	Metrosideros polymorpha	34	1	0	native	NA	1	10	10.3
Hawai'i Island	78	PACN_Hawaii	1000	-155.58	19.266	2011	1	35371	Metrosideros polymorpha	34	1	0	native	NA	1	10	11.2
Hawai'i Island	78	PACN_Hawaii	1000	-155.58	19.266	2011	1	35373	Metrosideros polymorpha	34	1	0	native	NA	1	10	16.1
Hawai'i Island	78	PACN_Hawaii	1000	-155.58	19.266	2011	1	35378	Metrosideros polymorpha	34	1	0	native	NA	1	10	22.1
Hawai'i Island	78	PACN_Hawaii	1000	-155.58	19.266	2011	1	35383	Metrosideros polymorpha	34	1	0	native	NA	1	10	29.2
Hawai'i Island	78	PACN_Hawaii	1000	-155.58	19.266	2011	1	35385	Metrosideros polymorpha	34	1	0	native	NA	1	10	65.2
Hawai'i Island	78	PACN_Hawaii	1000	-155.58	19.266	2011	1	35390	Metrosideros polymorpha	34	1	0	native	NA	1	10	42
Hawai'i Island	78	PACN_Hawaii	1000	-155.58	19.266	2011	1	35392	Metrosideros polymorpha	34	1	0	native	NA	1	10	24.5
Hawai'i Island	78	PACN_Hawaii	1000	-155.58	19.266	2011	1	35401	Metrosideros polymorpha	34	1	0	native	NA	1	10	20.1
Hawai'i Island	78	PACN_Hawaii	1000	-155.58	19.266	2011	1	35403	Metrosideros polymorpha	34	1	0	native	NA	1	10	31.7
Hawai'i Island	78	PACN_Hawaii	1000	-155.58	19.266	2011	1	35374	Metrosideros polymorpha	34	1	0	native	NA	1	10	15.5
Hawai'i Island	78	PACN_Hawaii	1000	-155.58	19.266	2011	1	35354	Metrosideros polymorpha	34	1	0	native	NA	1	10	14.5
Hawai'i Island	78	PACN_Hawaii	1000	-155.58	19.266	2011	1	35379	Metrosideros polymorpha	34	1	0	native	NA	1	10	21.4
Hawai'i Island	78	PACN_Hawaii	1000	-155.58	19.266	2011	1	35349	Metrosideros polymorpha	34	1	0	native	NA	1	10	46.7
Hawai'i Island	78	PACN_Hawaii	1000	-155.58	19.266	2011	1	35358	Myrsine lessertiana	43	1	0	native	NA	1	10	14.2
Hawai'i Island	79	PACN_Hawaii	1000	-155.604	19.245	2011	1	35696	Cheirodendron trigynum	6	1	0	native	NA	1	10	14.4
Hawai'i Island	79	PACN_Hawaii	1000	-155.604	19.245	2011	1	35699	Cheirodendron trigynum	6	1	0	native	NA	1	10	17
Hawai'i Island	79	PACN_Hawaii	1000	-155.604	19.245	2011	1	35679	Cheirodendron trigynum	6	1	0	native	NA	1	10	12
Hawai'i Island	79	PACN_Hawaii	1000	-155.604	19.245	2011	1	35673	Cheirodendron trigynum	6	1	0	native	NA	1	10	10
Hawai'i Island	79	PACN_Hawaii	1000	-155.604	19.245	2011	1	35686	Cibotium glaucum	14	0	0	native	NA	1	40	19.4
Hawai'i Island	79	PACN_Hawaii	1000	-155.604	19.245	2011	1	35685	Cibotium glaucum	14	0	0	native	NA	1	40	13.2
Hawai'i Island	79	PACN_Hawaii	1000	-155.604	19.245	2011	1	35697	Coprosma spp.	47	1	0	native	NA	1	10	13.5
Hawai'i Island	79	PACN_Hawaii	1000	-155.604	19.245	2011	1	35703	Ilex anomala	5	1	0	native	NA	1	10	11.5
Hawai'i Island	79	PACN_Hawaii	1000	-155.604	19.245	2011	1	35692	Ilex anomala	5	1	0	native	NA	1	10	15.4
Hawai'i Island	79	PACN_Hawaii	1000	-155.604	19.245	2011	1	35683	Ilex anomala	5	1	0	native	NA	1	10	20.7
Hawai'i Island	79	PACN_Hawaii	1000	-155.604	19.245	2011	1	35670	Ilex anomala	5	1	0	native	NA	1	10	26.9
Hawai'i Island	79	PACN_Hawaii	1000	-155.604	19.245	2011	1	35662	Ilex anomala	5	1	0	native	NA	1	10	12.1
Hawai'i Island	79	PACN_Hawaii	1000	-155.604	19.245	2011	1	35668	Ilex anomala	5	1	0	native	NA	1	10	15.9
Hawai'i Island	79	PACN_Hawaii	1000	-155.604	19.245	2011	1	35666	Metrosideros polymorpha	34	1	0	native	NA	1	10	61.9
Hawai'i Island	79	PACN_Hawaii	1000	-155.604	19.245	2011	1	35677	Metrosideros polymorpha	34	1	0	native	NA	1	10	19.7
Hawai'i Island	79	PACN_Hawaii	1000	-155.604	19.245	2011	1	35680	Metrosideros polymorpha	34	1	0	native	NA	1	10	90.5
Hawai'i Island	79	PACN_Hawaii	1000	-155.604	19.245	2011	1	35687	Metrosideros polymorpha	34	1	0	native	NA	1	10	91.6
Hawai'i Island	79	PACN_Hawaii	1000	-155.604	19.245	2011	1	35700	Metrosideros polymorpha	34	1	0	native	NA	1	10	30.8
Hawai'i Island	79	PACN_Hawaii	1000	-155.604	19.245	2011	1	35701	Metrosideros polymorpha	34	1	0	native	NA	1	10	19
Hawai'i Island	79	PACN_Hawaii	1000	-155.604	19.245	2011	1	35702	Metrosideros polymorpha	34	1	0	native	NA	1	10	97.5
Hawai'i Island	79	PACN_Hawaii	1000	-155.604	19.245	2011	1	35706	Metrosideros polymorpha	34	1	0	native	NA	1	10	15
Hawai'i Island	79	PACN_Hawaii	1000	-155.604	19.245	2011	1	35695	Metrosideros polymorpha	34	1	0	native	NA	1	10	69.7
Hawai'i Island	79	PACN_Hawaii	1000	-155.604	19.245	2011	1	35688	Metrosideros polymorpha	34	1	0	native	NA	1	10	34.2
Hawai'i Island	79	PACN_Hawaii	1000	-155.604	19.245	2011	1	35690	Metrosideros polymorpha	34	1	0	native	NA	1	10	19.6
Hawai'i Island	79	PACN_Hawaii	1000	-155.604	19.245	2011	1	35698	Metrosideros polymorpha	34	1	0	native	NA	1	10	15.6
Hawai'i Island	79	PACN_Hawaii	1000	-155.604	19.245	2011	1	35694	Metrosideros polymorpha	34	1	0	native	NA	1	10	36.5
Hawai'i Island	79	PACN_Hawaii	1000	-155.604	19.245	2011	1	35674	Metrosideros polymorpha	34	1	0	native	NA	1	10	115.9
Hawai'i Island	79	PACN_Hawaii	1000	-155.604	19.245	2011	1	35675	Metrosideros polymorpha	34	1	0	native	NA	1	10	45.2
Hawai'i Island	79	PACN_Hawaii	1000	-155.604	19.245	2011	1	35691	Metrosideros polymorpha	34	1	0	native	NA	1	10	46.2
Hawai'i Island	79	PACN_Hawaii	1000	-155.604	19.245	2011	1	35711	Metrosideros polymorpha	34	1	0	native	NA	1	40	NA
Hawai'i Island	79	PACN_Hawaii	1000	-155.604	19.245	2011	1	35704	Metrosideros polymorpha	34	1	0	native	NA	1	10	58.3
Hawai'i Island	79	PACN_Hawaii	1000	-155.604	19.245	2011	1	35678	Metrosideros polymorpha	34	1	0	native	NA	1	10	42.3
Hawai'i Island	79	PACN_Hawaii	1000	-155.604	19.245	2011	1	35676	Metrosideros polymorpha	34	1	0	native	NA	1	10	20.3
Hawai'i Island	79	PACN_Hawaii	1000	-155.604	19.245	2011	1	35693	Metrosideros polymorpha	34	1	0	native	NA	1	10	61.2
Hawai'i Island	79	PACN_Hawaii	1000	-155.604	19.245	2011	1	35663	Metrosideros polymorpha	34	1	0	native	NA	1	10	108
Hawai'i Island	79	PACN_Hawaii	1000	-155.604	19.245	2011	1	35707	Metrosideros polymorpha	34	1	0	native	NA	1	40	NA
Hawai'i Island	79	PACN_Hawaii	1000	-155.604	19.245	2011	1	35667	Metrosideros polymorpha	34	1	0	native	NA	1	10	75.3
Hawai'i Island	79	PACN_Hawaii	1000	-155.604	19.245	2011	1	35708	Myrsine lessertiana	43	1	0	native	NA	1	40	NA
Hawai'i Island	79	PACN_Hawaii	1000	-155.604	19.245	2011	1	35709	Myrsine lessertiana	43	1	0	native	NA	1	40	NA
Hawai'i Island	79	PACN_Hawaii	1000	-155.604	19.245	2011	1	35705	Myrsine lessertiana	43	1	0	native	NA	1	10	11.2
Hawai'i Island	79	PACN_Hawaii	1000	-155.604	19.245	2011	1	35710	Myrsine lessertiana	43	1	0	native	NA	1	40	NA
Hawai'i Island	79	PACN_Hawaii	1000	-155.604	19.245	2011	1	35689	Myrsine lessertiana	43	1	0	native	NA	1	10	13.4
Hawai'i Island	79	PACN_Hawaii	1000	-155.604	19.245	2011	1	35716	Myrsine lessertiana	43	1	0	native	NA	1	40	NA
Hawai'i Island	79	PACN_Hawaii	1000	-155.604	19.245	2011	1	35684	Myrsine lessertiana	43	1	0	native	NA	1	10	10.5
Hawai'i Island	79	PACN_Hawaii	1000	-155.604	19.245	2011	1	35664	Myrsine lessertiana	43	1	0	native	NA	1	10	13.4
Hawai'i Island	79	PACN_Hawaii	1000	-155.604	19.245	2011	1	35682	Myrsine lessertiana	43	1	0	native	NA	1	10	12.1
Hawai'i Island	79	PACN_Hawaii	1000	-155.604	19.245	2011	1	35665	Myrsine lessertiana	43	1	0	native	NA	1	10	12.5
Hawai'i Island	79	PACN_Hawaii	1000	-155.604	19.245	2011	1	35671	Myrsine lessertiana	43	1	0	native	NA	1	10	13.2
Hawai'i Island	79	PACN_Hawaii	1000	-155.604	19.245	2011	1	35672	Myrsine lessertiana	43	1	0	native	NA	1	10	16.2
Hawai'i Island	79	PACN_Hawaii	1000	-155.604	19.245	2011	1	35681	Myrsine lessertiana	43	1	0	native	NA	1	10	10.7
Hawai'i Island	79	PACN_Hawaii	1000	-155.604	19.245	2011	1	35661	Myrsine lessertiana	43	1	0	native	NA	1	10	15.4
Hawai'i Island	79	PACN_Hawaii	1000	-155.604	19.245	2011	1	35669	Myrsine lessertiana	43	1	0	native	NA	1	10	11.8
Hawai'i Island	79	PACN_Hawaii	1000	-155.604	19.245	2011	1	35659	Myrsine lessertiana	43	1	0	native	NA	1	10	11.5
Hawai'i Island	79	PACN_Hawaii	1000	-155.604	19.245	2011	1	35660	Myrsine lessertiana	43	1	0	native	NA	1	10	20.5
Hawai'i Island	80	PACN_Hawaii	1000	-155.664	19.191	2011	1	36156	Metrosideros polymorpha	34	1	0	native	NA	1	10	15.3
Hawai'i Island	80	PACN_Hawaii	1000	-155.664	19.191	2011	1	36157	Metrosideros polymorpha	34	1	0	native	NA	1	10	19.5
Hawai'i Island	80	PACN_Hawaii	1000	-155.664	19.191	2011	1	36161	Metrosideros polymorpha	34	1	0	native	NA	1	10	28.5
Hawai'i Island	80	PACN_Hawaii	1000	-155.664	19.191	2011	1	36162	Metrosideros polymorpha	34	1	0	native	NA	1	10	29.3
Hawai'i Island	80	PACN_Hawaii	1000	-155.664	19.191	2011	1	36163	Metrosideros polymorpha	34	1	0	native	NA	1	10	10.4
Hawai'i Island	80	PACN_Hawaii	1000	-155.664	19.191	2011	1	36164	Metrosideros polymorpha	34	1	0	native	NA	1	10	32.4
Hawai'i Island	80	PACN_Hawaii	1000	-155.664	19.191	2011	1	36166	Metrosideros polymorpha	34	1	0	native	NA	1	10	33
Hawai'i Island	80	PACN_Hawaii	1000	-155.664	19.191	2011	1	36168	Metrosideros polymorpha	34	1	0	native	NA	1	10	10.6
Hawai'i Island	80	PACN_Hawaii	1000	-155.664	19.191	2011	1	36169	Metrosideros polymorpha	34	1	0	native	NA	1	10	28.6
Hawai'i Island	80	PACN_Hawaii	1000	-155.664	19.191	2011	1	36172	Metrosideros polymorpha	34	1	0	native	NA	1	10	16.1
Hawai'i Island	80	PACN_Hawaii	1000	-155.664	19.191	2011	1	36173	Metrosideros polymorpha	34	1	0	native	NA	1	10	14.1
Hawai'i Island	80	PACN_Hawaii	1000	-155.664	19.191	2011	1	36174	Metrosideros polymorpha	34	1	0	native	NA	1	10	11.2
Hawai'i Island	80	PACN_Hawaii	1000	-155.664	19.191	2011	1	36176	Metrosideros polymorpha	34	1	0	native	NA	1	10	30.3
Hawai'i Island	80	PACN_Hawaii	1000	-155.664	19.191	2011	1	36177	Metrosideros polymorpha	34	1	0	native	NA	1	10	20.8
Hawai'i Island	80	PACN_Hawaii	1000	-155.664	19.191	2011	1	36178	Metrosideros polymorpha	34	1	0	native	NA	1	10	19.6
Hawai'i Island	80	PACN_Hawaii	1000	-155.664	19.191	2011	1	36179	Metrosideros polymorpha	34	1	0	native	NA	1	10	17.2
Hawai'i Island	80	PACN_Hawaii	1000	-155.664	19.191	2011	1	36180	Metrosideros polymorpha	34	1	0	native	NA	1	10	17.7
Hawai'i Island	80	PACN_Hawaii	1000	-155.664	19.191	2011	1	36181	Metrosideros polymorpha	34	1	0	native	NA	1	10	32
Hawai'i Island	80	PACN_Hawaii	1000	-155.664	19.191	2011	1	36182	Metrosideros polymorpha	34	1	0	native	NA	1	10	16.4
Hawai'i Island	80	PACN_Hawaii	1000	-155.664	19.191	2011	1	36184	Metrosideros polymorpha	34	1	0	native	NA	1	10	19.8
Hawai'i Island	80	PACN_Hawaii	1000	-155.664	19.191	2011	1	36185	Metrosideros polymorpha	34	1	0	native	NA	1	10	12.2
Hawai'i Island	80	PACN_Hawaii	1000	-155.664	19.191	2011	1	36186	Metrosideros polymorpha	34	1	0	native	NA	1	10	13.4
Hawai'i Island	80	PACN_Hawaii	1000	-155.664	19.191	2011	1	36188	Metrosideros polymorpha	34	1	0	native	NA	1	10	32.2
Hawai'i Island	80	PACN_Hawaii	1000	-155.664	19.191	2011	1	36192	Metrosideros polymorpha	34	1	0	native	NA	1	10	27.4
Hawai'i Island	80	PACN_Hawaii	1000	-155.664	19.191	2011	1	36193	Metrosideros polymorpha	34	1	0	native	NA	1	10	32.3
Hawai'i Island	80	PACN_Hawaii	1000	-155.664	19.191	2011	1	36194	Metrosideros polymorpha	34	1	0	native	NA	1	10	31.9
Hawai'i Island	80	PACN_Hawaii	1000	-155.664	19.191	2011	1	36195	Metrosideros polymorpha	34	1	0	native	NA	1	10	18.6
Hawai'i Island	80	PACN_Hawaii	1000	-155.664	19.191	2011	1	36196	Metrosideros polymorpha	34	1	0	native	NA	1	10	10.1
Hawai'i Island	80	PACN_Hawaii	1000	-155.664	19.191	2011	1	36197	Metrosideros polymorpha	34	1	0	native	NA	1	10	47.7
Hawai'i Island	80	PACN_Hawaii	1000	-155.664	19.191	2011	1	36198	Metrosideros polymorpha	34	1	0	native	NA	1	10	13.2
Hawai'i Island	80	PACN_Hawaii	1000	-155.664	19.191	2011	1	36199	Metrosideros polymorpha	34	1	0	native	NA	1	10	18.8
Hawai'i Island	80	PACN_Hawaii	1000	-155.664	19.191	2011	1	36200	Metrosideros polymorpha	34	1	0	native	NA	1	10	12.6
Hawai'i Island	80	PACN_Hawaii	1000	-155.664	19.191	2011	1	36201	Metrosideros polymorpha	34	1	0	native	NA	1	10	10.7
Hawai'i Island	80	PACN_Hawaii	1000	-155.664	19.191	2011	1	36202	Metrosideros polymorpha	34	1	0	native	NA	1	10	42.9
Hawai'i Island	80	PACN_Hawaii	1000	-155.664	19.191	2011	1	36206	Metrosideros polymorpha	34	1	0	native	NA	1	10	20.8
Hawai'i Island	80	PACN_Hawaii	1000	-155.664	19.191	2011	1	36208	Metrosideros polymorpha	34	1	0	native	NA	1	10	17.3
Hawai'i Island	80	PACN_Hawaii	1000	-155.664	19.191	2011	1	36210	Metrosideros polymorpha	34	1	0	native	NA	1	10	19.4
Hawai'i Island	80	PACN_Hawaii	1000	-155.664	19.191	2011	1	36214	Metrosideros polymorpha	34	1	0	native	NA	1	10	13.3
Hawai'i Island	80	PACN_Hawaii	1000	-155.664	19.191	2011	1	36215	Metrosideros polymorpha	34	1	0	native	NA	1	10	17.5
Hawai'i Island	80	PACN_Hawaii	1000	-155.664	19.191	2011	1	36216	Metrosideros polymorpha	34	1	0	native	NA	1	10	58.9
Hawai'i Island	80	PACN_Hawaii	1000	-155.664	19.191	2011	1	36217	Metrosideros polymorpha	34	1	0	native	NA	1	10	10.3
Hawai'i Island	80	PACN_Hawaii	1000	-155.664	19.191	2011	1	36218	Metrosideros polymorpha	34	1	0	native	NA	1	10	16.3
Hawai'i Island	80	PACN_Hawaii	1000	-155.664	19.191	2011	1	36219	Metrosideros polymorpha	34	1	0	native	NA	1	10	46.2
Hawai'i Island	80	PACN_Hawaii	1000	-155.664	19.191	2011	1	36245	Metrosideros polymorpha	34	1	0	native	NA	1	40	NA
Hawai'i Island	80	PACN_Hawaii	1000	-155.664	19.191	2011	1	36246	Metrosideros polymorpha	34	1	0	native	NA	1	40	NA
Hawai'i Island	80	PACN_Hawaii	1000	-155.664	19.191	2011	1	36247	Metrosideros polymorpha	34	1	0	native	NA	1	40	NA
Hawai'i Island	80	PACN_Hawaii	1000	-155.664	19.191	2011	1	36248	Metrosideros polymorpha	34	1	0	native	NA	1	40	NA
Hawai'i Island	80	PACN_Hawaii	1000	-155.664	19.191	2011	1	36258	Metrosideros polymorpha	34	1	0	native	NA	1	40	NA
Hawai'i Island	80	PACN_Hawaii	1000	-155.664	19.191	2011	1	36265	Metrosideros polymorpha	34	1	0	native	NA	1	40	NA
Hawai'i Island	80	PACN_Hawaii	1000	-155.664	19.191	2011	1	36212	Metrosideros polymorpha	34	1	0	native	NA	1	10	17.6
Hawai'i Island	80	PACN_Hawaii	1000	-155.664	19.191	2011	1	36158	Metrosideros polymorpha	34	1	0	native	NA	1	10	26.1
Hawai'i Island	80	PACN_Hawaii	1000	-155.664	19.191	2011	1	36167	Metrosideros polymorpha	34	1	0	native	NA	1	10	48.5
Hawai'i Island	80	PACN_Hawaii	1000	-155.664	19.191	2011	1	36211	Metrosideros polymorpha	34	1	0	native	NA	1	10	11.7
Hawai'i Island	80	PACN_Hawaii	1000	-155.664	19.191	2011	1	36213	Metrosideros polymorpha	34	1	0	native	NA	1	10	18.5
Hawai'i Island	80	PACN_Hawaii	1000	-155.664	19.191	2011	1	36155	Metrosideros polymorpha	34	1	0	native	NA	1	10	15.9
Hawai'i Island	80	PACN_Hawaii	1000	-155.664	19.191	2011	1	36170	Metrosideros polymorpha	34	1	0	native	NA	1	10	16.3
Hawai'i Island	80	PACN_Hawaii	1000	-155.664	19.191	2011	1	36171	Metrosideros polymorpha	34	1	0	native	NA	1	10	15
Hawai'i Island	80	PACN_Hawaii	1000	-155.664	19.191	2011	1	36183	Metrosideros polymorpha	34	1	0	native	NA	1	10	19.1
Hawai'i Island	80	PACN_Hawaii	1000	-155.664	19.191	2011	1	36187	Metrosideros polymorpha	34	1	0	native	NA	1	10	23.9
Hawai'i Island	80	PACN_Hawaii	1000	-155.664	19.191	2011	1	36189	Metrosideros polymorpha	34	1	0	native	NA	1	10	22.4
Hawai'i Island	80	PACN_Hawaii	1000	-155.664	19.191	2011	1	36190	Metrosideros polymorpha	34	1	0	native	NA	1	10	11.1
Hawai'i Island	80	PACN_Hawaii	1000	-155.664	19.191	2011	1	36191	Metrosideros polymorpha	34	1	0	native	NA	1	10	17.1
Hawai'i Island	80	PACN_Hawaii	1000	-155.664	19.191	2011	1	36205	Metrosideros polymorpha	34	1	0	native	NA	1	10	17.7
Hawai'i Island	80	PACN_Hawaii	1000	-155.664	19.191	2011	1	36165	Metrosideros polymorpha	34	1	0	native	NA	1	10	35.4
Hawai'i Island	80	PACN_Hawaii	1000	-155.664	19.191	2011	1	36160	Metrosideros polymorpha	34	1	0	native	NA	1	10	12.2
Hawai'i Island	80	PACN_Hawaii	1000	-155.664	19.191	2011	1	36175	Metrosideros polymorpha	34	1	0	native	NA	1	10	16.6
Hawai'i Island	80	PACN_Hawaii	1000	-155.664	19.191	2011	1	36203	Metrosideros polymorpha	34	1	0	native	NA	1	10	14
Hawai'i Island	80	PACN_Hawaii	1000	-155.664	19.191	2011	1	36204	Metrosideros polymorpha	34	1	0	native	NA	1	10	20.4
Hawai'i Island	80	PACN_Hawaii	1000	-155.664	19.191	2011	1	36207	Metrosideros polymorpha	34	1	0	native	NA	1	10	31.5
Hawai'i Island	80	PACN_Hawaii	1000	-155.664	19.191	2011	1	36209	Metrosideros polymorpha	34	1	0	native	NA	1	10	20.1
Hawai'i Island	80	PACN_Hawaii	1000	-155.664	19.191	2011	1	36159	Metrosideros polymorpha	34	1	0	native	NA	1	10	14.1
Hawai'i Island	81	PACN_Hawaii	1000	-155.608	19.24	2011	1	35787	Cheirodendron trigynum	6	1	0	native	NA	1	10	11.8
[truncated: 41,591 more rows]
